# Supplementary material for: A Transcriptome Meta-Analysis Proposes Novel Biological Roles for the Antifungal Protein AnAFP in Aspergillus niger
Source: PubMed Central journal article supplement (PMC5106034; doi:10.1371/journal.pone.0165755), 2016-11-11

S4A Fig

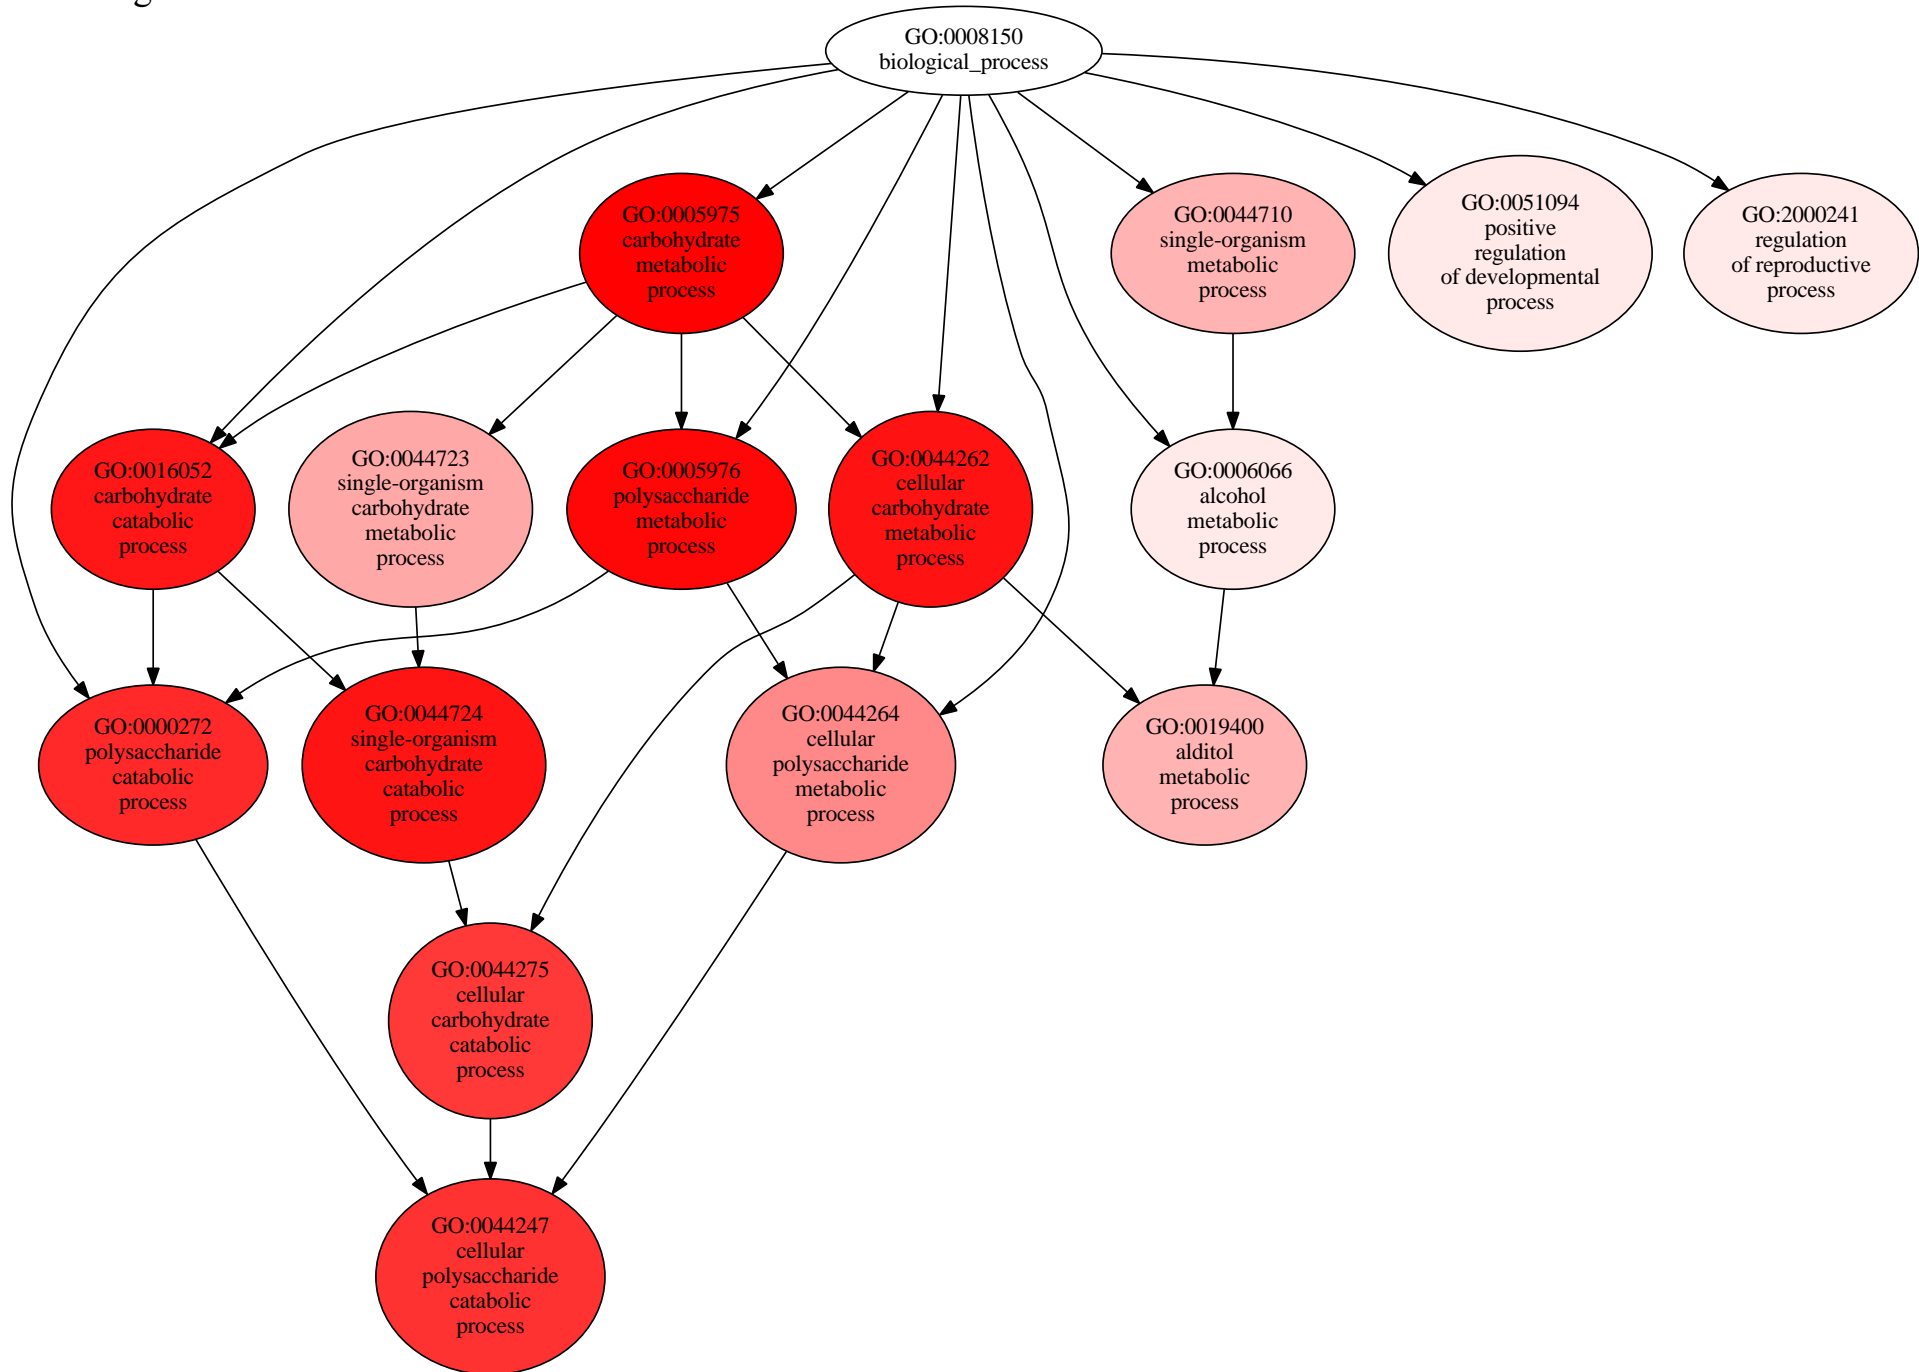

S4B Fig

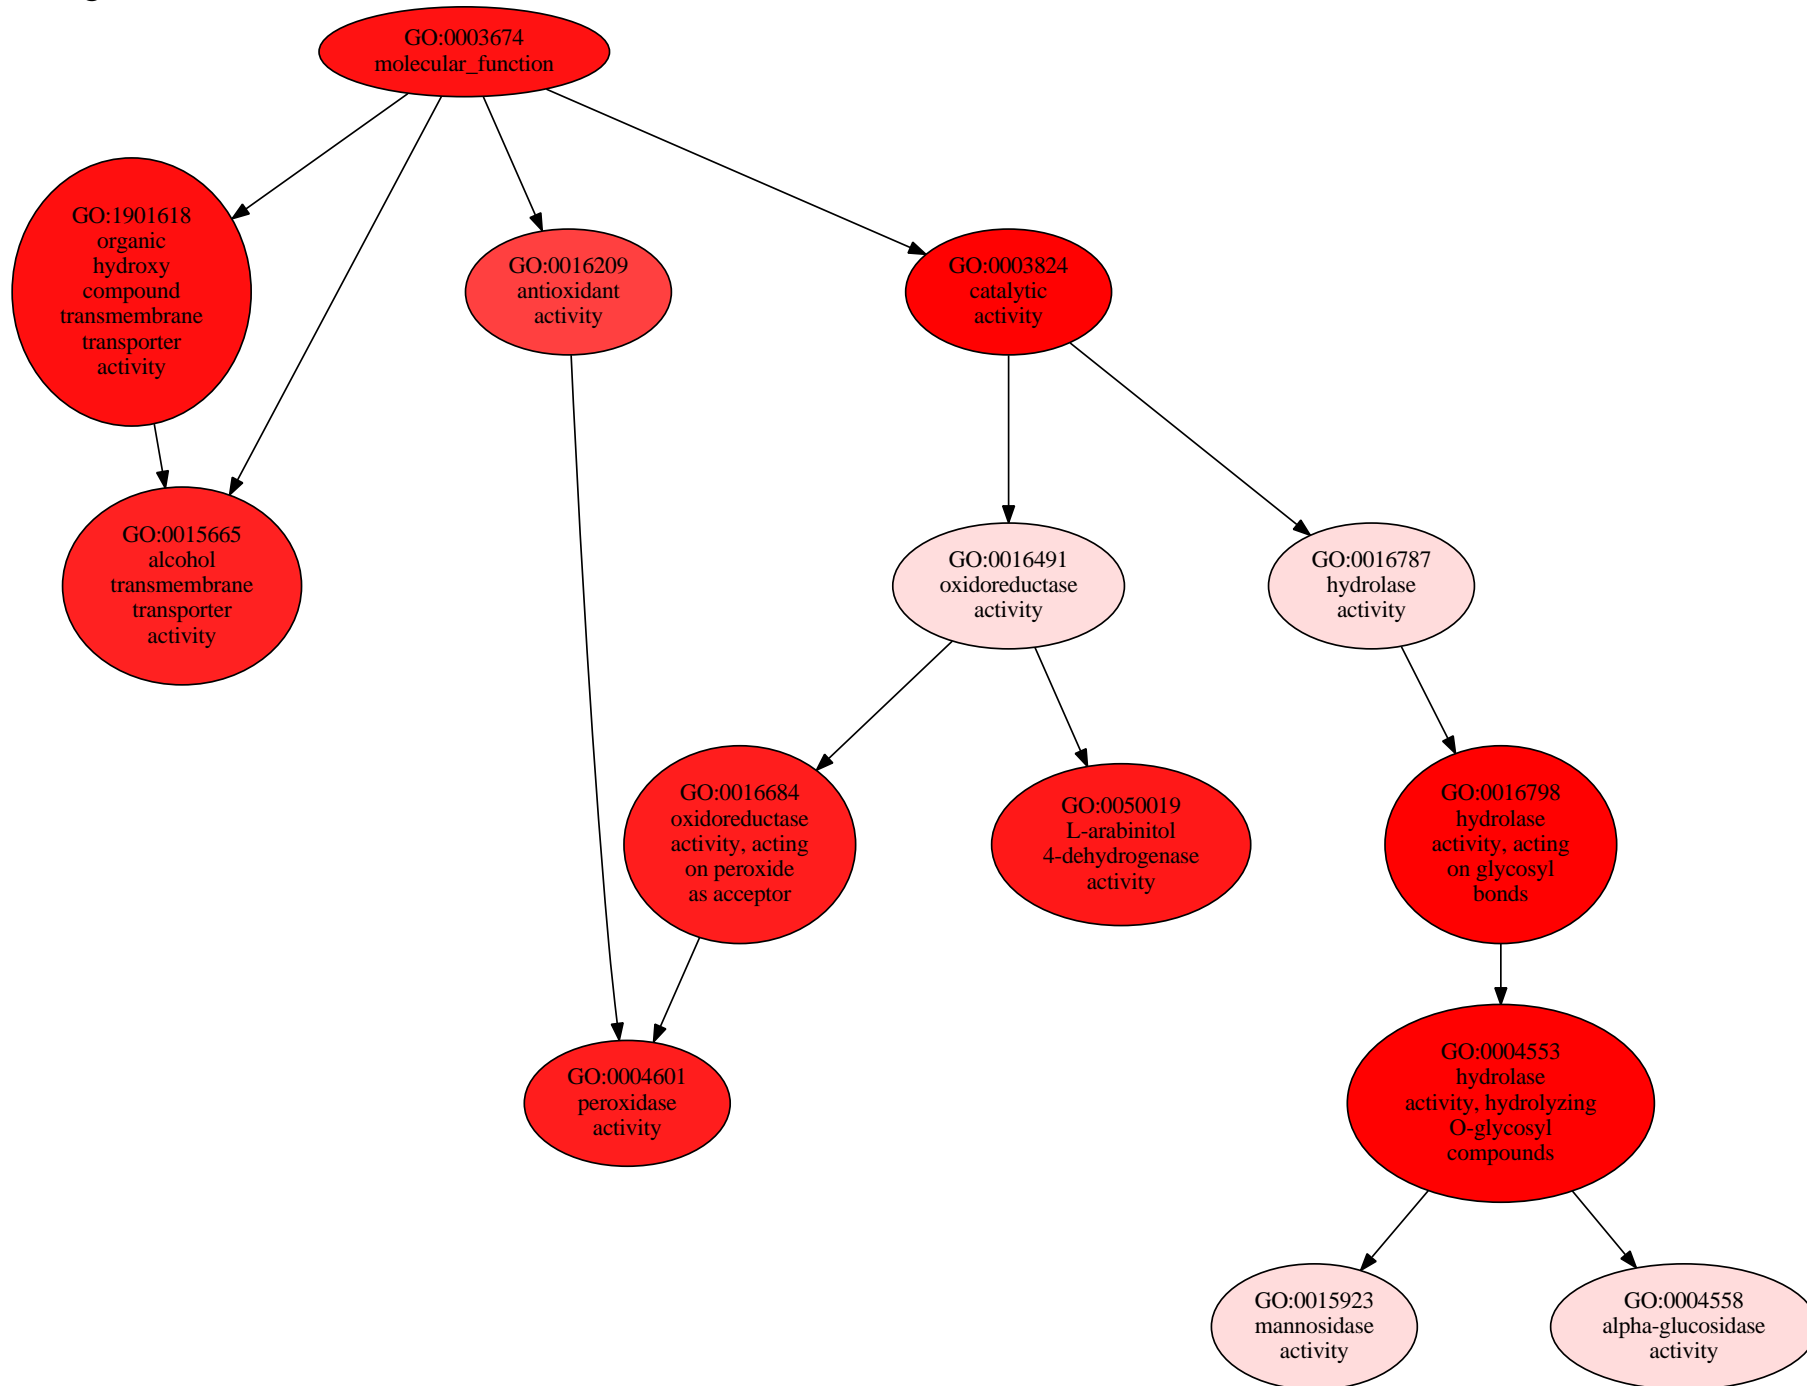

S4C Fig

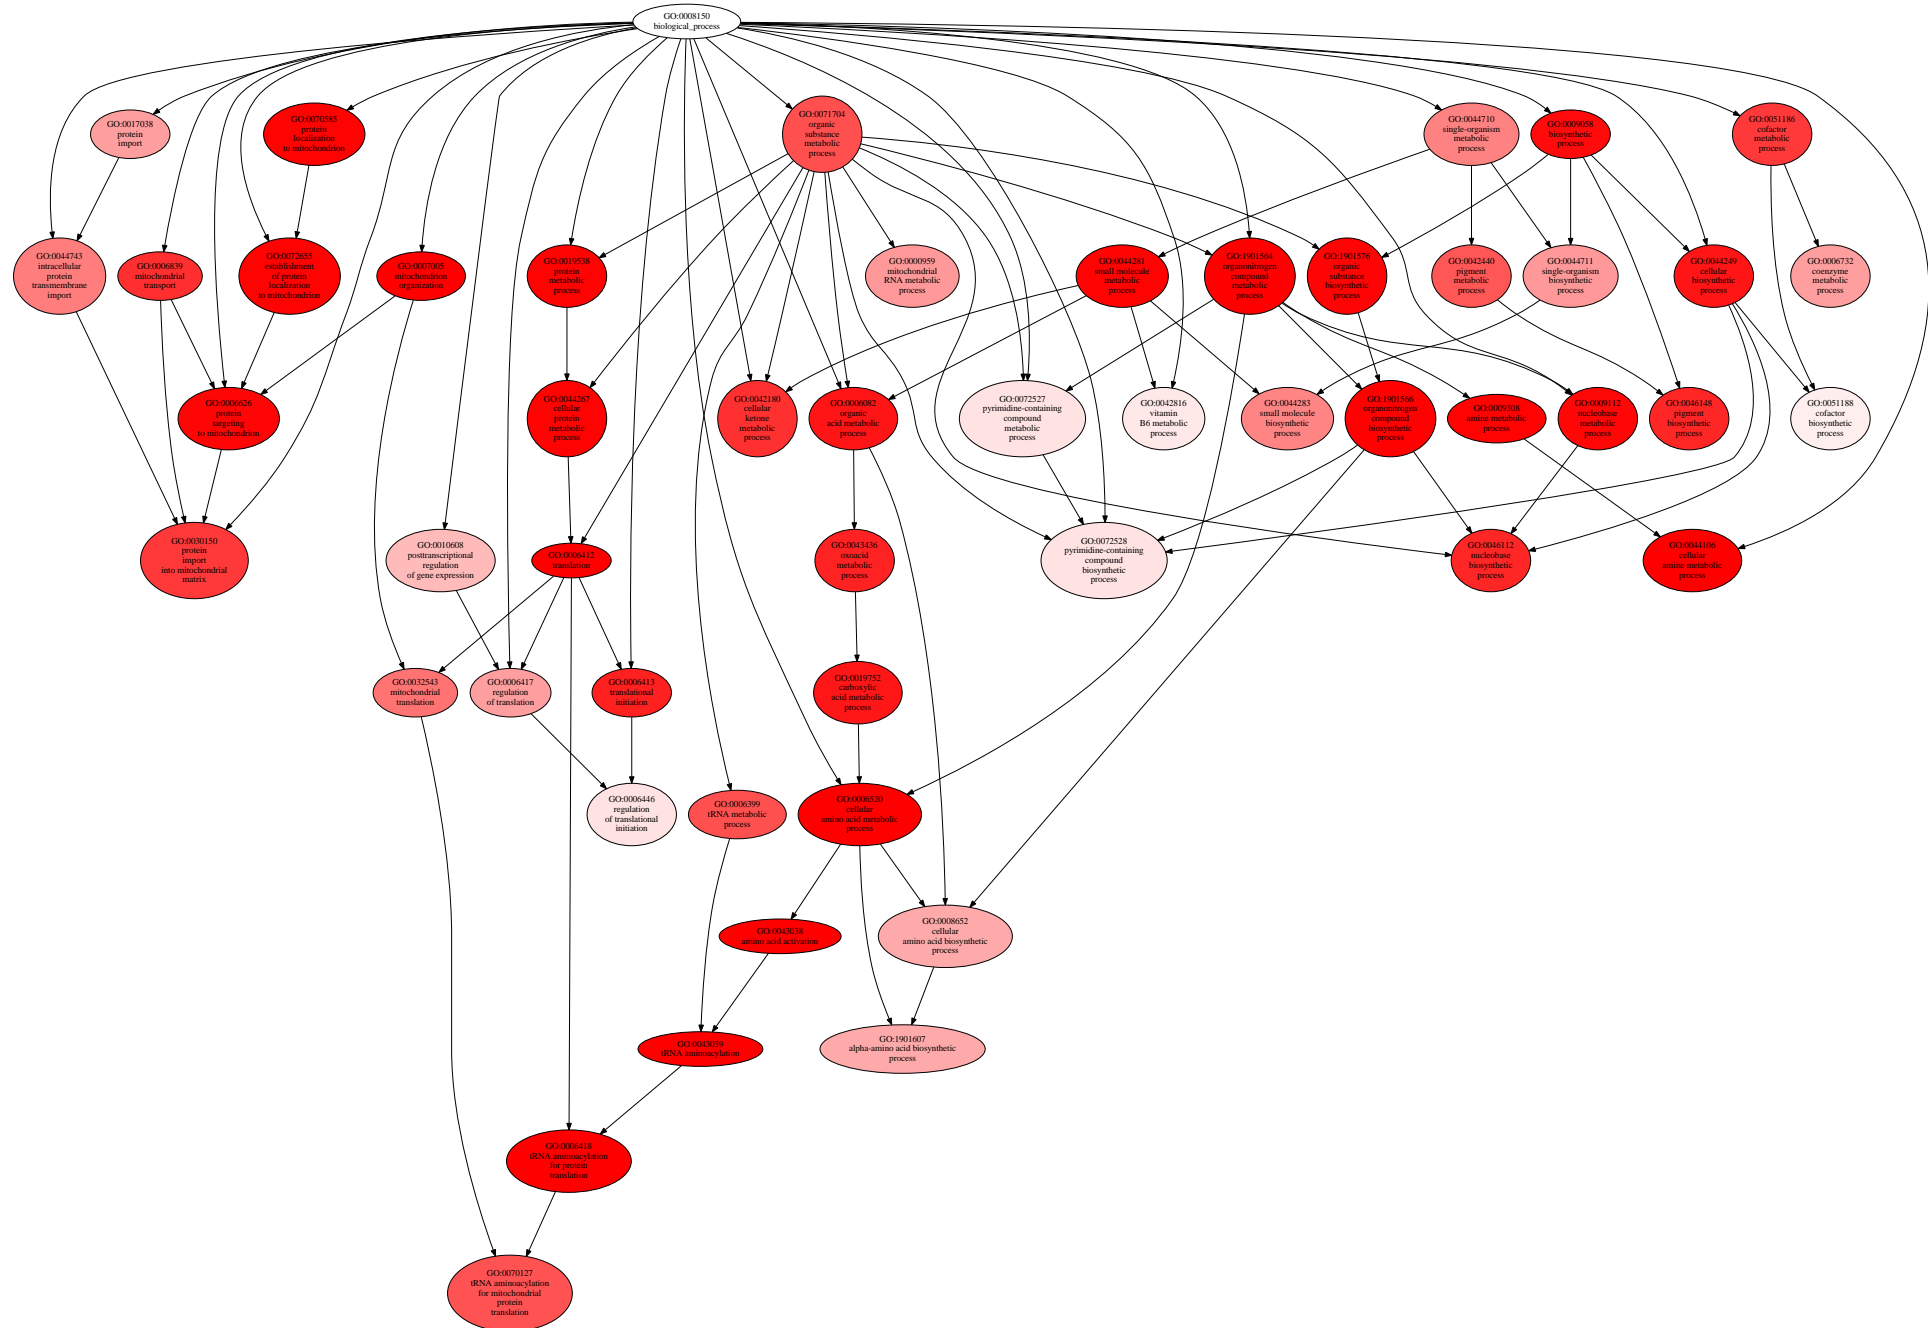

S4D Fig

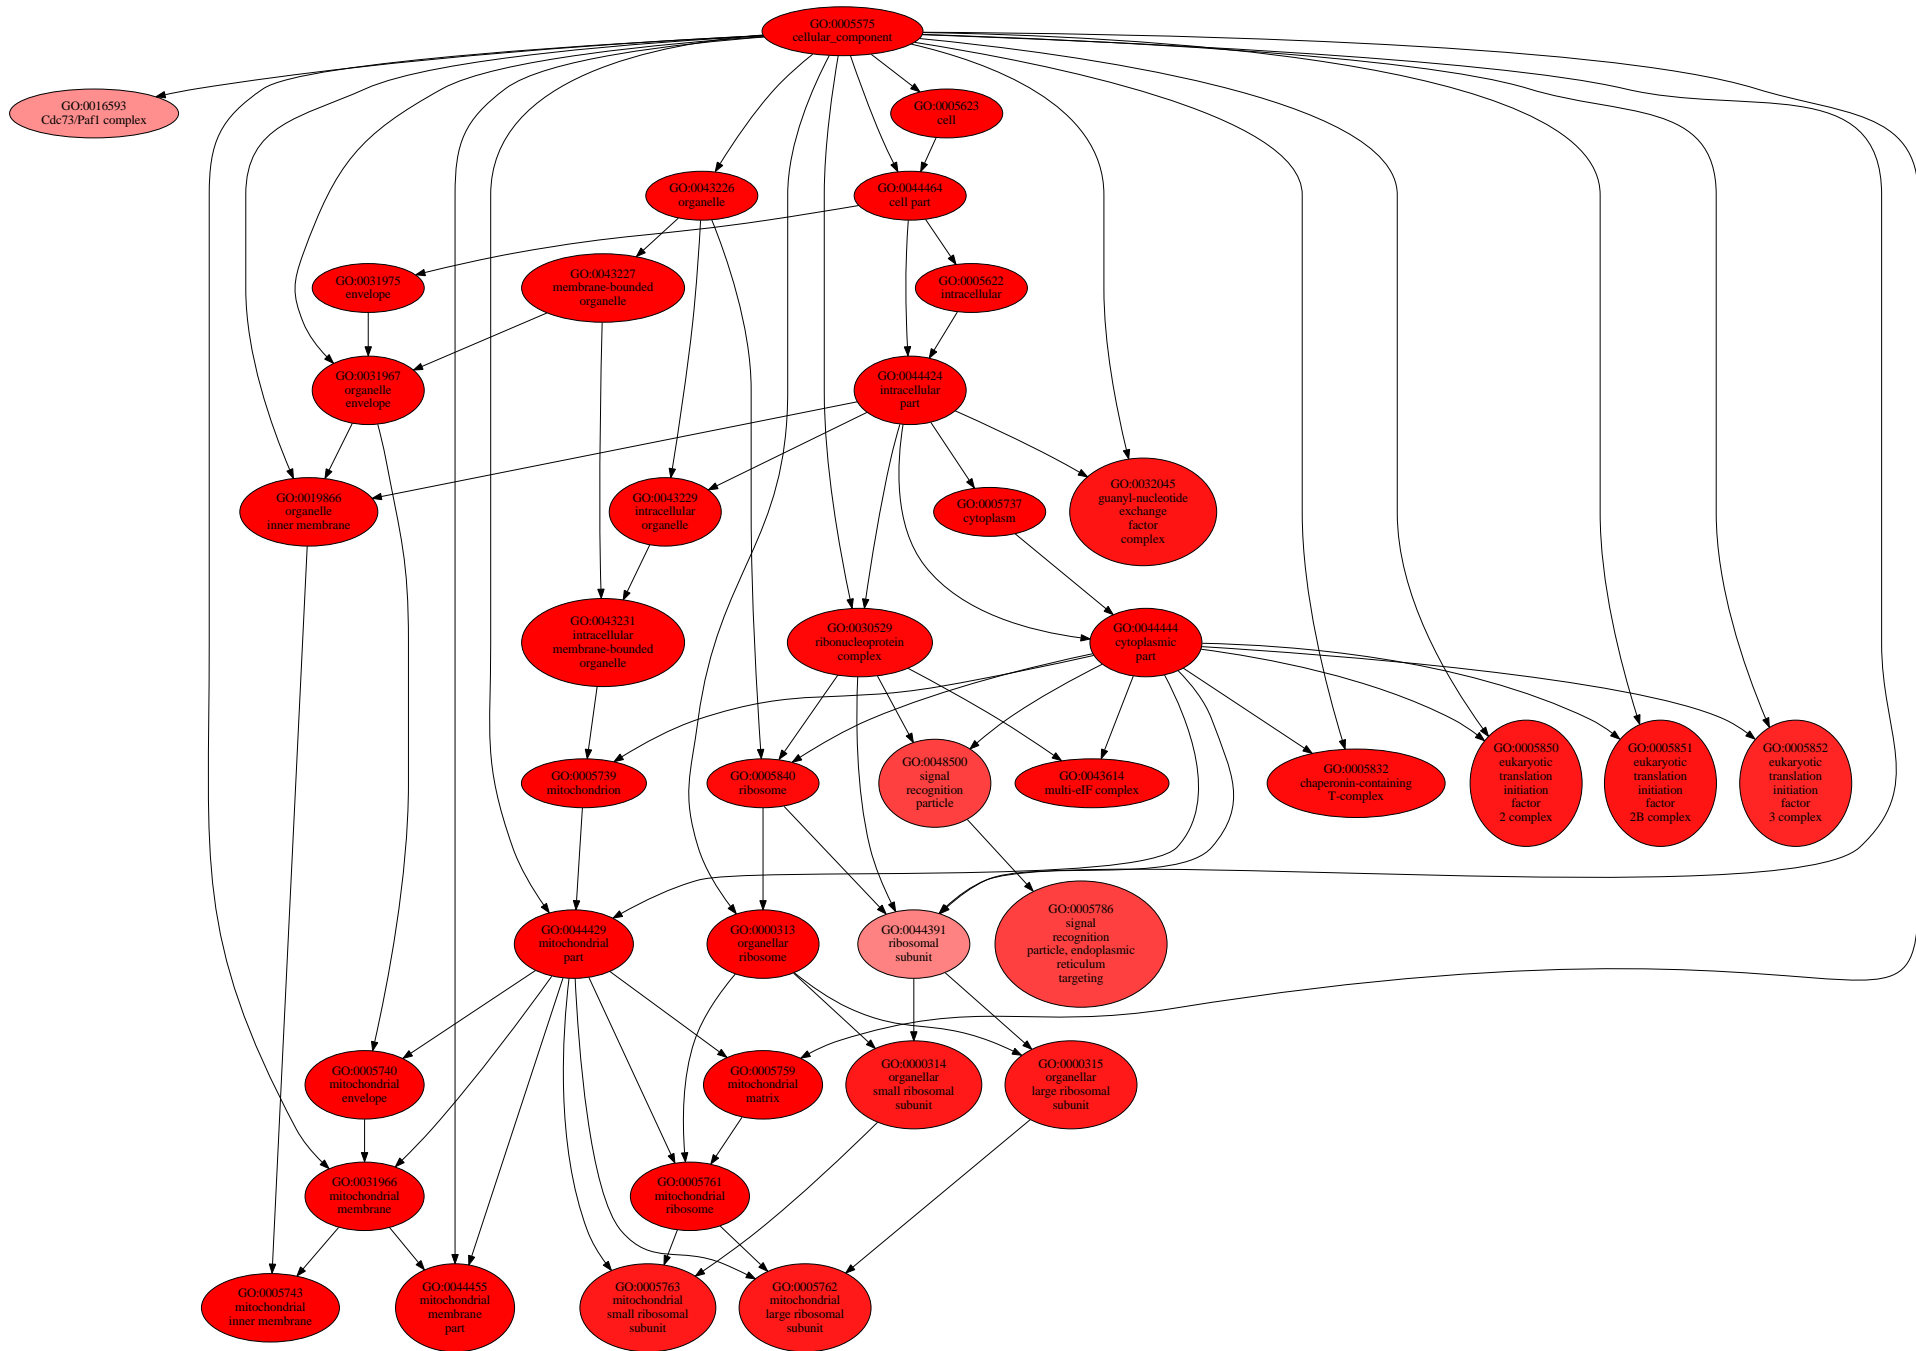

S4E Fig

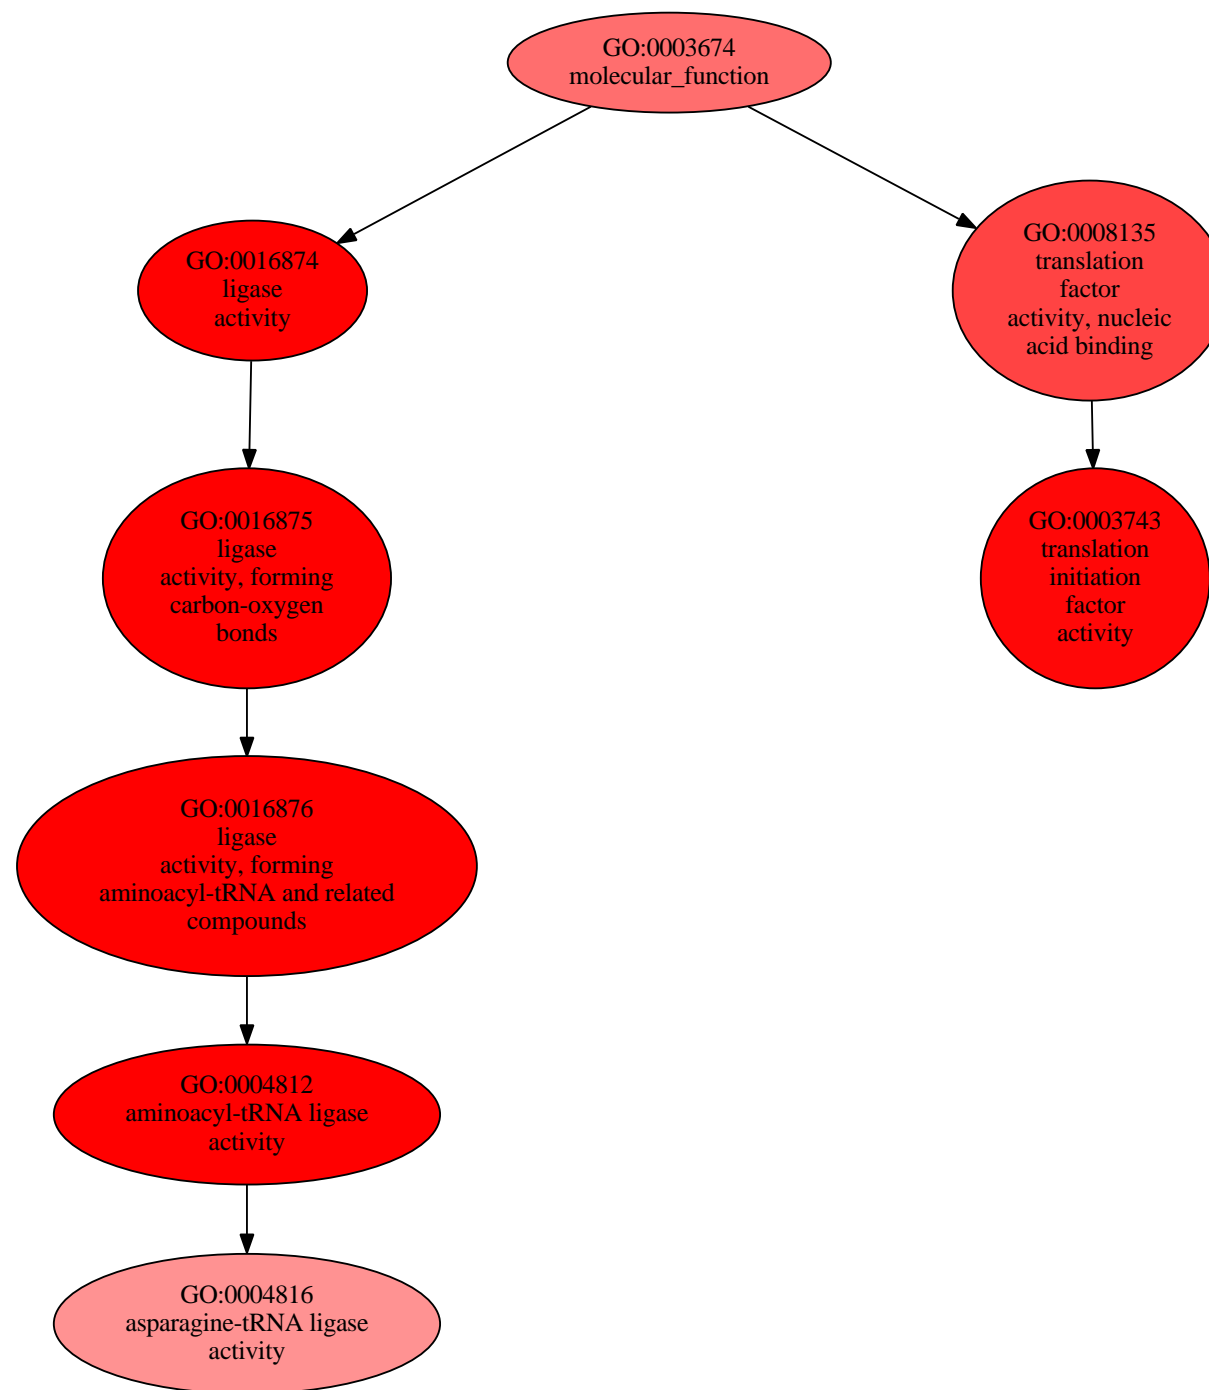

Supplement: pone.0165755.s004.pdf [file pone.0165755.s004.pdf]
