# Supplementary material for: A Transcriptome Meta-Analysis Proposes Novel Biological Roles for the Antifungal Protein AnAFP in Aspergillus niger
Source: PubMed Central journal article supplement (PMC5106034; doi:10.1371/journal.pone.0165755), 2016-11-11
Supplement: pone.0165755.s006.pdf [file pone.0165755.s006.pdf]

S1 Table

| ID condition | ID chip | GEO series* | Expression level, AU | SD Expression level | Publication / Remark                                                                                                                                                                                          |                                                                                         |
|--------------|---------|-------------|----------------------|---------------------|---------------------------------------------------------------------------------------------------------------------------------------------------------------------------------------------------------------|-----------------------------------------------------------------------------------------|
| 1            | 1       | GSE42258    | 53,7                 | 17,9                | Kwon MJ, et al. The transcriptomic signature of RacA activation and inactivation provides new insights into the morphogenetic network of <i>Aspergillus niger</i> . PLoS One 2013;8(7):e68946.                |                                                                                         |
|              | 2       | GSE42258    |                      |                     |                                                                                                                                                                                                               |                                                                                         |
|              | 3       | GSE42258    |                      |                     |                                                                                                                                                                                                               |                                                                                         |
| 2            | 4       | GSE42258    | 611,0                | 118,5               |                                                                                                                                                                                                               |                                                                                         |
|              | 5       | GSE42258    |                      |                     |                                                                                                                                                                                                               |                                                                                         |
| 3            | 6       | GSE42258    | 386,5                | 5,7                 |                                                                                                                                                                                                               |                                                                                         |
|              | 7       | GSE42258    |                      |                     |                                                                                                                                                                                                               |                                                                                         |
| 4            | 8       | GSE42258    | 481,5                | 47,1                |                                                                                                                                                                                                               |                                                                                         |
|              | 9       | GSE42258    |                      |                     |                                                                                                                                                                                                               |                                                                                         |
| 5            | 10      | GSE42258    | 1219,8               | 786,8               |                                                                                                                                                                                                               |                                                                                         |
|              | 11      | GSE42258    |                      |                     |                                                                                                                                                                                                               |                                                                                         |
| 6            | 12      | GSE42258    | 29,2                 | 0,5                 |                                                                                                                                                                                                               |                                                                                         |
|              | 13      | GSE42258    |                      |                     |                                                                                                                                                                                                               |                                                                                         |
|              | 14      | GSE42258    |                      |                     |                                                                                                                                                                                                               |                                                                                         |
| 7            | 15      |             | 42,6                 | 18,9                |                                                                                                                                                                                                               |                                                                                         |
|              | 16      |             |                      |                     |                                                                                                                                                                                                               |                                                                                         |
| 8            | 17      |             | 29,9                 | 5,9                 | Additional own unplished data to Kwon MJ, et al. 2013                                                                                                                                                         |                                                                                         |
|              | 18      |             |                      |                     |                                                                                                                                                                                                               |                                                                                         |
| 9            | 19      |             | 30,1                 | 0,3                 |                                                                                                                                                                                                               |                                                                                         |
|              | 20      |             |                      |                     |                                                                                                                                                                                                               |                                                                                         |
| 10           | 21      | GSE17641    | 26,2                 | 5,5                 |                                                                                                                                                                                                               |                                                                                         |
|              | 22      | GSE17641    |                      |                     |                                                                                                                                                                                                               |                                                                                         |
| 11           | 23      | GSE17641    | 27,0                 | 0,9                 | Meyer V, et al. Reconstruction of signaling networks regulating fungal morphogenesis by transcriptomics. Eukaryot Cell 2009 Nov;8(11):1677-91.                                                                |                                                                                         |
|              | 24      | GSE17641    |                      |                     |                                                                                                                                                                                                               |                                                                                         |
|              | 25      | GSE17641    |                      |                     |                                                                                                                                                                                                               |                                                                                         |
|              | 26      | GSE17641    |                      |                     |                                                                                                                                                                                                               |                                                                                         |
| 12           | 27      | GSE56471    | 27,0                 | 3,8                 |                                                                                                                                                                                                               |                                                                                         |
|              | 28      | GSE56471    |                      |                     |                                                                                                                                                                                                               |                                                                                         |
| 13           | 29      | GSE56471    | 26,7                 | 3,6                 |                                                                                                                                                                                                               |                                                                                         |
|              | 30      | GSE56471    |                      |                     |                                                                                                                                                                                                               |                                                                                         |
| 14           | 31      | GSE56471    | 25,1                 | 0,7                 | Fiedler M, et al. The capacity of <i>Aspergillus niger</i> to sense and respond to cell wall stress requires at least three transcription factors: RlmA, MsnA AND CrzA. Fungal Biol Biotechnol 2014, 1(5).    |                                                                                         |
|              | 32      | GSE56471    |                      |                     |                                                                                                                                                                                                               |                                                                                         |
| 15           | 33      | GSE56471    | 27,2                 | 3,7                 |                                                                                                                                                                                                               |                                                                                         |
|              | 34      | GSE56471    |                      |                     |                                                                                                                                                                                                               |                                                                                         |
| 16           | 35      | GSE56471    | 26,8                 | 0,3                 |                                                                                                                                                                                                               |                                                                                         |
|              | 36      | GSE56471    |                      |                     |                                                                                                                                                                                                               |                                                                                         |
| 17           | 37      | GSE56471    | 24,3                 | 1,6                 |                                                                                                                                                                                                               |                                                                                         |
|              | 38      | GSE56471    |                      |                     |                                                                                                                                                                                                               |                                                                                         |
| 18           | 39      | GSE56471    | 26,4                 | 2,2                 |                                                                                                                                                                                                               |                                                                                         |
|              | 40      | GSE56471    |                      |                     |                                                                                                                                                                                                               |                                                                                         |
| 19           | 41      | GSE56471    | 26,2                 | 9,7                 |                                                                                                                                                                                                               |                                                                                         |
|              | 42      | GSE56471    |                      |                     |                                                                                                                                                                                                               |                                                                                         |
| 20           | 43      |             | 26,7                 | 1,1                 |                                                                                                                                                                                                               | Additional own unplished data to Fiedler M, et al. 2014; testing of AFP and caspofungin |
|              | 44      |             |                      |                     |                                                                                                                                                                                                               |                                                                                         |
| 21           | 45      |             | 31,7                 | 5,5                 |                                                                                                                                                                                                               |                                                                                         |
|              | 46      |             |                      |                     |                                                                                                                                                                                                               |                                                                                         |
| 22           | 47      |             | 257,2                | 96,3                |                                                                                                                                                                                                               |                                                                                         |
|              | 48      |             |                      |                     |                                                                                                                                                                                                               |                                                                                         |
| 23           | 49      |             | 209,8                | 80,2                |                                                                                                                                                                                                               |                                                                                         |
|              | 50      |             |                      |                     |                                                                                                                                                                                                               |                                                                                         |
| 24           | 51      |             | 194,3                | 56,9                | Jørgensen TR, et al. Transcriptomic comparison of <i>Aspergillus niger</i> growing on two different sugars reveals coordinated regulation of the secretory pathway. BMC Genomics 2009, 10:44.                 |                                                                                         |
|              | 52      |             |                      |                     |                                                                                                                                                                                                               |                                                                                         |
| 25           | 53      |             | 138,4                | 18,4                |                                                                                                                                                                                                               |                                                                                         |
|              | 54      |             |                      |                     |                                                                                                                                                                                                               |                                                                                         |
| 26           | 55      |             | 24,4                 | 1,4                 |                                                                                                                                                                                                               |                                                                                         |
|              | 56      |             |                      |                     |                                                                                                                                                                                                               |                                                                                         |
| 27           | 57      |             | 25,9                 | 0,6                 |                                                                                                                                                                                                               |                                                                                         |
|              | 58      |             |                      |                     |                                                                                                                                                                                                               |                                                                                         |
| 28           | 59      |             | 24,4                 | 1,4                 |                                                                                                                                                                                                               |                                                                                         |
|              | 60      |             |                      |                     |                                                                                                                                                                                                               |                                                                                         |
| 29           | 61      |             | 28,2                 | 3,8                 | Yuan XL, et al. Identification of InuR, a new Zn(II)2Cys6 transcriptional activator involved in the regulation of inulinolytic genes in <i>Aspergillus niger</i> . Mol Genet Genomics. 2008 Jan;279(1):11-26. |                                                                                         |
|              | 62      |             |                      |                     |                                                                                                                                                                                                               |                                                                                         |
| 30           | 63      |             | 30,0                 | 5,1                 |                                                                                                                                                                                                               |                                                                                         |
|              | 64      |             |                      |                     |                                                                                                                                                                                                               |                                                                                         |
| 31           | 65      |             | 27,1                 | 2,0                 |                                                                                                                                                                                                               |                                                                                         |
|              | 66      |             |                      |                     |                                                                                                                                                                                                               |                                                                                         |
| 32           | 67      |             | 50,9                 | 26,1                |                                                                                                                                                                                                               |                                                                                         |
|              | 68      |             |                      |                     |                                                                                                                                                                                                               |                                                                                         |
| 33           | 69      |             | 29,5                 | 0,7                 | Guillemette T, et al. Genomic analysis of the secretion stress response in the enzyme-producing cell factory <i>Aspergillus niger</i> . BMC Genomics 2007                                                     |                                                                                         |
|              | 70      |             |                      |                     |                                                                                                                                                                                                               |                                                                                         |
| 33           | 71      |             | 29,5                 | 0,7                 |                                                                                                                                                                                                               |                                                                                         |
|              | 72      |             |                      |                     |                                                                                                                                                                                                               |                                                                                         |
| 33           | 73      |             | 29,5                 | 0,7                 |                                                                                                                                                                                                               |                                                                                         |
|              | 74      |             |                      |                     |                                                                                                                                                                                                               |                                                                                         |

|    |            |          |         |        |                                                                                                                                                                                                                                                      |                                                                                                                                                                                          |
|----|------------|----------|---------|--------|------------------------------------------------------------------------------------------------------------------------------------------------------------------------------------------------------------------------------------------------------|------------------------------------------------------------------------------------------------------------------------------------------------------------------------------------------|
| 34 | 75<br>76   |          | 31,1    | 1,7    | the enzyme producing cell factory, <i>Aspergillus niger</i> . BMC Genomics 2007, 8:158.                                                                                                                                                              |                                                                                                                                                                                          |
| 35 | 77<br>78   | GSE39559 | 4013,1  | 291,0  | Nitsche BM, et al. The carbon starvation response of <i>Aspergillus niger</i> during submerged cultivation: insights from the transcriptome and secretome. BMC Genomics 2012 Aug 8;13:380.                                                           |                                                                                                                                                                                          |
| 36 | 79<br>80   | GSE39559 | 2854,1  | 195,4  |                                                                                                                                                                                                                                                      |                                                                                                                                                                                          |
| 37 | 81<br>82   | GSE39559 | 912,4   | 89,2   |                                                                                                                                                                                                                                                      |                                                                                                                                                                                          |
| 38 | 83<br>84   |          | 30,1    | 2,6    |                                                                                                                                                                                                                                                      |                                                                                                                                                                                          |
| 39 | 85<br>86   |          | 16956,5 | 762,1  |                                                                                                                                                                                                                                                      |                                                                                                                                                                                          |
| 40 | 87<br>88   |          | 21320,8 | 152,2  | van Münster JM, et al. Systems approaches to predict the functions of glycoside hydrolases during the life cycle of <i>Aspergillus niger</i> using developmental mutants $\Delta$ brlA and $\Delta$ flbA. PLoS One. 2015 Jan 28;10(1):e0116269.      |                                                                                                                                                                                          |
| 41 | 89<br>90   |          | 20195,6 | 1007,9 |                                                                                                                                                                                                                                                      |                                                                                                                                                                                          |
| 42 | 91<br>92   |          | 752,4   | 15,4   |                                                                                                                                                                                                                                                      |                                                                                                                                                                                          |
| 43 | 93<br>94   |          | 660,5   | 171,5  |                                                                                                                                                                                                                                                      |                                                                                                                                                                                          |
| 44 | 95<br>96   |          | 5601,0  | 393,2  |                                                                                                                                                                                                                                                      |                                                                                                                                                                                          |
| 45 | 97<br>98   |          | 2571,6  | 443,1  |                                                                                                                                                                                                                                                      |                                                                                                                                                                                          |
| 46 | 99<br>100  | GSE21752 | 15300,4 | 1362,4 |                                                                                                                                                                                                                                                      | Jørgensen TR, et al. Transcriptomic insights into the physiology of <i>Aspergillus niger</i> approaching a specific growth rate of zero. Appl Environ Microbiol 2010 Aug;76(16):5344-55. |
| 47 | 101<br>102 | GSE21752 | 16471,3 | 2222,5 |                                                                                                                                                                                                                                                      |                                                                                                                                                                                          |
|    | 103<br>104 | GSE21752 |         |        |                                                                                                                                                                                                                                                      |                                                                                                                                                                                          |
| 48 | 105<br>106 |          | 28,2    | 0,9    |                                                                                                                                                                                                                                                      |                                                                                                                                                                                          |
| 49 | 107<br>108 |          | 28,3    | 2,0    |                                                                                                                                                                                                                                                      |                                                                                                                                                                                          |
| 50 | 109<br>110 |          | 24,5    | 2,1    | Own unpublished data; Secretion stress response to tunicamycin                                                                                                                                                                                       |                                                                                                                                                                                          |
| 51 | 111<br>112 |          | 24,5    | 2,1    |                                                                                                                                                                                                                                                      |                                                                                                                                                                                          |
|    | 113<br>114 |          | 22,8    | 5,0    |                                                                                                                                                                                                                                                      |                                                                                                                                                                                          |
|    | 115<br>116 |          |         |        |                                                                                                                                                                                                                                                      |                                                                                                                                                                                          |
| 52 | 117<br>118 | GSE39070 | 35,6    | 6,8    |                                                                                                                                                                                                                                                      |                                                                                                                                                                                          |
| 53 | 119<br>120 | GSE39070 | 28,5    | 0,3    |                                                                                                                                                                                                                                                      |                                                                                                                                                                                          |
|    | 121<br>122 | GSE39070 |         |        | Carvalho ND, et al. Genome-wide expression analysis upon constitutive activation of the HacA bZIP transcription factor in <i>Aspergillus niger</i> reveals a coordinated cellular response to counteract ER stress. BMC Genomics 2012 Jul 30;13:350. |                                                                                                                                                                                          |
| 54 | 123<br>124 | GSE39070 | 27,1    | 1,0    |                                                                                                                                                                                                                                                      |                                                                                                                                                                                          |
|    | 125<br>126 | GSE39070 |         |        |                                                                                                                                                                                                                                                      |                                                                                                                                                                                          |
| 55 | 127<br>128 | GSE39070 | 26,6    | 0,5    |                                                                                                                                                                                                                                                      |                                                                                                                                                                                          |
|    | 129<br>130 | GSE14285 | 31,7    |        |                                                                                                                                                                                                                                                      |                                                                                                                                                                                          |
| 56 | 131<br>132 | GSE14285 | 29,7    |        |                                                                                                                                                                                                                                                      |                                                                                                                                                                                          |
| 57 | 133<br>134 | GSE14285 | 38,2    |        |                                                                                                                                                                                                                                                      |                                                                                                                                                                                          |
| 58 | 135<br>136 | GSE14285 | 38,8    |        | van den Berg RA, et al. Identification of modules in <i>Aspergillus niger</i> by gene co-expression network analysis. Fungal Genet Biol 2010 Jun;47(6):539-50.                                                                                       |                                                                                                                                                                                          |
| 59 | 137<br>138 | GSE14285 | 50,4    |        |                                                                                                                                                                                                                                                      |                                                                                                                                                                                          |
| 60 | 139<br>140 | GSE14285 | 34,9    |        |                                                                                                                                                                                                                                                      |                                                                                                                                                                                          |
| 61 | 141<br>142 | GSE14285 | 33,3    |        |                                                                                                                                                                                                                                                      |                                                                                                                                                                                          |
| 62 | 143<br>144 | GSE14285 | 32,4    |        |                                                                                                                                                                                                                                                      |                                                                                                                                                                                          |
| 63 | 145<br>146 | GSE14285 | 31,6    |        |                                                                                                                                                                                                                                                      |                                                                                                                                                                                          |
| 64 | 147<br>148 | GSE14285 | 36,3    |        |                                                                                                                                                                                                                                                      |                                                                                                                                                                                          |
| 65 | 149<br>150 | GSE14285 | 33,1    |        |                                                                                                                                                                                                                                                      |                                                                                                                                                                                          |
| 66 | 151<br>152 | GSE14285 | 29,5    |        |                                                                                                                                                                                                                                                      |                                                                                                                                                                                          |
| 67 | 153<br>154 | GSE14285 | 29,4    |        |                                                                                                                                                                                                                                                      |                                                                                                                                                                                          |
| 68 | 155<br>156 | GSE14285 |         |        |                                                                                                                                                                                                                                                      |                                                                                                                                                                                          |
| 69 | 157<br>158 | GSE14285 |         |        |                                                                                                                                                                                                                                                      |                                                                                                                                                                                          |
| 70 | 159<br>160 | GSE14285 |         |        |                                                                                                                                                                                                                                                      |                                                                                                                                                                                          |
| 71 | 161<br>162 | GSE14285 |         |        |                                                                                                                                                                                                                                                      |                                                                                                                                                                                          |
| 72 | 145<br>146 | GSE11405 | 30,8    | 1,5    | van der Veen D, et al. Analysis of variance components reveals the contribution of sample processing to transcript variation. Appl Environ Microbiol 2009 Apr;75(8):2414-22.                                                                         |                                                                                                                                                                                          |
|    | 147<br>148 | GSE11405 |         |        |                                                                                                                                                                                                                                                      |                                                                                                                                                                                          |
|    | 149<br>150 | GSE11405 |         |        |                                                                                                                                                                                                                                                      |                                                                                                                                                                                          |
| 73 | 151<br>152 | GSE11405 | 31,8    | 0,9    |                                                                                                                                                                                                                                                      |                                                                                                                                                                                          |
|    | 153<br>154 | GSE11405 |         |        |                                                                                                                                                                                                                                                      |                                                                                                                                                                                          |

|     |     |          |         |        |                                                                                                                                                                                                                                                  |
|-----|-----|----------|---------|--------|--------------------------------------------------------------------------------------------------------------------------------------------------------------------------------------------------------------------------------------------------|
| 74  | 152 |          | 30,8    |        |                                                                                                                                                                                                                                                  |
| 75  | 153 |          | 36,7    |        |                                                                                                                                                                                                                                                  |
| 76  | 154 |          | 302,9   |        |                                                                                                                                                                                                                                                  |
| 77  | 155 |          | 3904,7  |        |                                                                                                                                                                                                                                                  |
| 78  | 156 |          | 144,7   |        |                                                                                                                                                                                                                                                  |
| 79  | 157 |          | 48,3    |        |                                                                                                                                                                                                                                                  |
| 80  | 158 |          | 29,2    |        |                                                                                                                                                                                                                                                  |
| 81  | 159 |          | 62,8    |        |                                                                                                                                                                                                                                                  |
| 82  | 160 |          | 79,7    |        |                                                                                                                                                                                                                                                  |
| 83  | 161 |          | 28,0    |        |                                                                                                                                                                                                                                                  |
| 84  | 162 |          | 30,5    |        |                                                                                                                                                                                                                                                  |
| 85  | 163 |          | 28,6    |        |                                                                                                                                                                                                                                                  |
| 86  | 164 |          | 32,8    |        |                                                                                                                                                                                                                                                  |
| 87  | 165 |          | 29,2    |        |                                                                                                                                                                                                                                                  |
| 88  | 166 |          | 34,1    |        |                                                                                                                                                                                                                                                  |
| 89  | 167 |          | 42,4    |        |                                                                                                                                                                                                                                                  |
| 90  | 168 |          | 3217,3  |        |                                                                                                                                                                                                                                                  |
| 91  | 169 |          | 61,2    |        |                                                                                                                                                                                                                                                  |
| 92  | 170 |          | 202,1   |        |                                                                                                                                                                                                                                                  |
| 93  | 171 |          | 164,5   |        |                                                                                                                                                                                                                                                  |
| 94  | 172 |          | 3518,0  |        |                                                                                                                                                                                                                                                  |
| 95  | 173 |          | 28,4    |        |                                                                                                                                                                                                                                                  |
| 96  | 174 |          | 25,9    |        |                                                                                                                                                                                                                                                  |
| 97  | 175 |          | 27,5    |        |                                                                                                                                                                                                                                                  |
| 98  | 176 |          | 531,0   |        |                                                                                                                                                                                                                                                  |
| 99  | 177 |          | 30,2    |        |                                                                                                                                                                                                                                                  |
| 100 | 178 |          | 32,0    |        |                                                                                                                                                                                                                                                  |
| 101 | 179 |          | 27,3    |        |                                                                                                                                                                                                                                                  |
| 102 | 180 |          | 5963,0  |        |                                                                                                                                                                                                                                                  |
| 103 | 181 | GSE17329 | 87,4    |        |                                                                                                                                                                                                                                                  |
| 104 | 182 | GSE17329 | 27,4    |        |                                                                                                                                                                                                                                                  |
| 105 | 183 | GSE17329 | 6391,4  |        |                                                                                                                                                                                                                                                  |
| 106 | 184 | GSE17329 | 120,5   |        |                                                                                                                                                                                                                                                  |
| 107 | 185 | GSE17329 | 7930,3  |        |                                                                                                                                                                                                                                                  |
| 108 | 186 | GSE17329 | 25,1    |        |                                                                                                                                                                                                                                                  |
| 109 | 187 | GSE17329 | 97,1    |        |                                                                                                                                                                                                                                                  |
| 110 | 188 | GSE17329 | 6077,7  |        |                                                                                                                                                                                                                                                  |
| 111 | 189 | GSE17329 | 7610,8  |        |                                                                                                                                                                                                                                                  |
| 112 | 190 | GSE17329 | 4735,2  |        |                                                                                                                                                                                                                                                  |
| 113 | 191 | GSE17329 | 9921,1  |        |                                                                                                                                                                                                                                                  |
| 114 | 192 | GSE17329 | 70,6    |        |                                                                                                                                                                                                                                                  |
| 115 | 193 | GSE17329 | 10266,5 |        |                                                                                                                                                                                                                                                  |
| 116 | 194 | GSE17329 | 5895,2  |        |                                                                                                                                                                                                                                                  |
| 117 | 195 | GSE17329 | 354,3   | 20,0   |                                                                                                                                                                                                                                                  |
|     | 196 | GSE17329 |         |        |                                                                                                                                                                                                                                                  |
| 118 | 197 | GSE17329 | 5512,7  | 336,7  |                                                                                                                                                                                                                                                  |
|     | 198 | GSE17329 |         |        |                                                                                                                                                                                                                                                  |
| 119 | 199 | GSE17329 | 79,8    |        |                                                                                                                                                                                                                                                  |
| 120 | 200 | GSE17329 | 44,0    |        |                                                                                                                                                                                                                                                  |
| 121 | 201 |          | 3051,0  | 409,7  |                                                                                                                                                                                                                                                  |
|     | 202 |          |         |        |                                                                                                                                                                                                                                                  |
|     | 203 |          |         |        |                                                                                                                                                                                                                                                  |
| 122 | 204 |          | 761,3   | 28,5   | Kwon MJ, et al. The transcriptomic fingerprint of glucoamylase over-expression in <i>Aspergillus niger</i> . BMC Genomics. 2012 Dec 13;13:701.                                                                                                   |
|     | 205 |          |         |        |                                                                                                                                                                                                                                                  |
|     | 206 |          |         |        |                                                                                                                                                                                                                                                  |
| 123 | 207 |          | 1520,6  | 364,1  |                                                                                                                                                                                                                                                  |
|     | 208 |          |         |        |                                                                                                                                                                                                                                                  |
| 124 | 209 |          | 741,6   | 116,3  | Ram et al., unpublished data; SCLA mutant analysis                                                                                                                                                                                               |
|     | 210 |          |         |        |                                                                                                                                                                                                                                                  |
| 125 | 211 | GSE50523 | 27,5    | 1,4    | Schachtschabel D, et al. The transcriptional repressor TupA in <i>Aspergillus niger</i> is involved in controlling gene expression related to cell wall biosynthesis, development, and nitrogen source availability. PLoS One 2013;8(10):e78102. |
|     | 212 | GSE50523 |         |        |                                                                                                                                                                                                                                                  |
| 126 | 213 | GSE50523 | 35,5    | 9,2    |                                                                                                                                                                                                                                                  |
|     | 214 | GSE50523 |         |        |                                                                                                                                                                                                                                                  |
| 127 | 215 | GSE25497 | 95,4    | 31,7   |                                                                                                                                                                                                                                                  |
|     | 216 | GSE25497 |         |        |                                                                                                                                                                                                                                                  |
|     | 217 | GSE25497 |         |        |                                                                                                                                                                                                                                                  |
|     | 218 | GSE25497 |         |        |                                                                                                                                                                                                                                                  |
|     | 219 | GSE25497 |         |        |                                                                                                                                                                                                                                                  |
| 128 | 220 | GSE32123 | 1944,1  | 37,4   |                                                                                                                                                                                                                                                  |
|     | 221 | GSE32123 |         |        |                                                                                                                                                                                                                                                  |
|     | 222 | GSE32123 |         |        |                                                                                                                                                                                                                                                  |
| 129 | 223 | GSE32123 | 7023,9  | 1206,9 | Bleichrodt R, et al. Cytosolic streaming in vegetative mycelium and aerial structures of <i>Aspergillus niger</i> . Stud Mycol 2013 Mar 15;74(1):31-46.                                                                                          |
|     | 224 | GSE32123 |         |        |                                                                                                                                                                                                                                                  |
|     | 225 | GSE32123 |         |        |                                                                                                                                                                                                                                                  |
| 130 | 226 | GSE36439 | 32,3    | 1,1    |                                                                                                                                                                                                                                                  |
|     | 227 | GSE36439 |         |        |                                                                                                                                                                                                                                                  |
|     | 228 | GSE36439 |         |        |                                                                                                                                                                                                                                                  |
| 131 | 229 | GSE36439 | 30,4    | 2,4    |                                                                                                                                                                                                                                                  |
|     | 230 | GSE36439 |         |        |                                                                                                                                                                                                                                                  |
|     | 231 | GSE36439 |         |        |                                                                                                                                                                                                                                                  |
| 132 | 232 | GSE36439 | 31,5    | 4,4    | van Leeuwen MR, et al. Germination of conidia of <i>Aspergillus niger</i> is                                                                                                                                                                     |

Martens-Uzunova ES, Schaap PJ. An evolutionary conserved d-galacturonic acid metabolic pathway operates across filamentous fungi capable of pectin degradation. Fungal Genet Biol 2008, 45(11):1449-1457.

van den Berg RA, et al. Identification of modules in *Aspergillus niger* by gene co-expression network analysis. Fungal Genet Biol 2010 Jun;47(6):539-50.

|     |     |          |         |        |                                                                                                                                                                                |
|-----|-----|----------|---------|--------|--------------------------------------------------------------------------------------------------------------------------------------------------------------------------------|
|     | 233 | GSE36439 |         |        | accompanied by major changes in RNA profiles. Stud Mycol 2013 Mar 15;74(1):59-70                                                                                               |
| 133 | 234 | GSE36439 | 29,3    | 0,7    |                                                                                                                                                                                |
|     | 235 | GSE36439 |         |        |                                                                                                                                                                                |
|     | 236 | GSE36439 |         |        |                                                                                                                                                                                |
|     | 237 | GSE36439 |         |        |                                                                                                                                                                                |
| 134 | 238 | GSE36439 | 28,0    | 3,9    |                                                                                                                                                                                |
|     | 239 | GSE36439 |         |        |                                                                                                                                                                                |
|     | 240 | GSE36439 |         |        |                                                                                                                                                                                |
| 135 | 241 | GSE36440 | 32,6    | 1,9    |                                                                                                                                                                                |
|     | 242 | GSE36440 |         |        |                                                                                                                                                                                |
|     | 243 | GSE36440 |         |        |                                                                                                                                                                                |
| 136 | 244 | GSE36440 | 27,3    | 1,8    |                                                                                                                                                                                |
|     | 245 | GSE36440 |         |        |                                                                                                                                                                                |
|     | 246 | GSE36440 |         |        | van Leeuwen MR, et al. The effect of natamycin on the transcriptome of conidia of <i>Aspergillus niger</i> . Stud Mycol 2013 Mar 15;74(1):71-85                                |
| 137 | 247 | GSE36440 | 34,8    | 1,7    |                                                                                                                                                                                |
|     | 248 | GSE36440 |         |        |                                                                                                                                                                                |
|     | 249 | GSE36440 |         |        |                                                                                                                                                                                |
| 138 | 250 | GSE36440 | 26,7    | 0,7    |                                                                                                                                                                                |
|     | 251 | GSE36440 |         |        |                                                                                                                                                                                |
|     | 252 | GSE36440 |         |        |                                                                                                                                                                                |
| 139 | 253 | GSE40219 | 722,9   | 585,8  |                                                                                                                                                                                |
|     | 254 | GSE40219 |         |        | Gruben BS, et al. GalX regulates the D-galactose oxido-reductive pathway in <i>Aspergillus niger</i> . FEBS Lett 2012 Nov 16;586(22):3980-5.                                   |
| 140 | 255 | GSE40219 | 259,3   | 208,8  |                                                                                                                                                                                |
|     | 256 | GSE40219 |         |        |                                                                                                                                                                                |
| 141 | 257 | GSE42480 | 34,0    |        |                                                                                                                                                                                |
| 142 | 258 | GSE42480 | 35,5    |        | Novodvorska M, et al. Transcriptional landscape of <i>Aspergillus niger</i> at breaking of conidial dormancy revealed by RNA-sequencing. BMC Genomics 2013 Apr 11;14:246.      |
| 143 | 259 | GSE42480 | 26,8    |        |                                                                                                                                                                                |
| 144 | 260 | GSE42480 | 23,8    |        |                                                                                                                                                                                |
| 145 | 261 | GSE42480 | 26,9    |        |                                                                                                                                                                                |
| 146 | 262 | GSE44391 | 13659,2 | 8655,3 |                                                                                                                                                                                |
|     | 263 | GSE44391 |         |        |                                                                                                                                                                                |
| 147 | 264 | GSE44391 | 9540,5  | 8403,3 |                                                                                                                                                                                |
|     | 265 | GSE44391 |         |        |                                                                                                                                                                                |
| 148 | 266 | GSE44391 | 3488,1  | 3407,0 | Krijgsheld P, Wosten HAB. Transcriptome Analysis of Zones of Colonies of the flbA strain of <i>Aspergillus niger</i> . Fungal Genom Biol 3:109. doi: 10.4172/2165-8056.1000109 |
|     | 267 | GSE44391 |         |        |                                                                                                                                                                                |
| 149 | 268 | GSE44391 | 14092,3 | 582,1  |                                                                                                                                                                                |
|     | 269 | GSE44391 |         |        |                                                                                                                                                                                |
| 150 | 270 | GSE44391 | 15759,2 | 1735,0 |                                                                                                                                                                                |
|     | 271 | GSE44391 |         |        |                                                                                                                                                                                |
| 151 | 272 | GSE44391 | 7312,6  | 920,7  |                                                                                                                                                                                |
|     | 273 | GSE44391 |         |        |                                                                                                                                                                                |
| 152 | 274 | GSE51023 | 1447,1  | 353,7  |                                                                                                                                                                                |
|     | 275 | GSE51023 |         |        | Gruben BS, et al. <i>Aspergillus niger</i> RhaR, a regulator involved in L-rhamnose release and catabolism. Appl Microbiol Biotechnol 2014 Jun;98(12):5531-40.                 |
| 153 | 276 | GSE51023 | 536,9   | 58,0   |                                                                                                                                                                                |
|     | 277 | GSE51023 |         |        |                                                                                                                                                                                |
| 154 | 278 | GSE46187 | 22,0    | 1,2    |                                                                                                                                                                                |
|     | 279 | GSE46187 |         |        |                                                                                                                                                                                |
|     | 280 | GSE46187 |         |        | Benoit I, et al. <i>Bacillus subtilis</i> attachment to <i>Aspergillus niger</i> hyphae results in mutually altered metabolism. Environ Microbiol 2015 Jun;17(6):2099-113.     |
| 155 | 281 | GSE46187 | 22,1    | 4,6    |                                                                                                                                                                                |
|     | 282 | GSE46187 |         |        |                                                                                                                                                                                |
|     | 283 | GSE46187 |         |        |                                                                                                                                                                                |

\*If made available by the authors
