# Supplementary material for: A Transcriptome Meta-Analysis Proposes Novel Biological Roles for the Antifungal Protein AnAFP in Aspergillus niger
Source: PubMed Central journal article supplement (PMC5106034; doi:10.1371/journal.pone.0165755), 2016-11-11
Supplement: pone.0165755.s007.pdf [file pone.0165755.s007.pdf]

S2 Table

| Gene ID    | Annotation                                                                                                        | Spearman coefficient |
|------------|-------------------------------------------------------------------------------------------------------------------|----------------------|
| An12g01300 | similarity to vegetative incompatibility protein tol - <i>Neurospora crassa</i>                                   | 0.75                 |
| An18g00980 | weak similarity to integral membrane protein PTH11 - <i>Magnaporthe grisea</i>                                    | 0.7                  |
| An18g00200 | hypothetical protein                                                                                              | 0.7                  |
| An13g01870 | similarity to hypothetical protein encoded by An04g06980 - <i>Aspergillus niger</i>                               | 0.7                  |
| An13g01860 | strong similarity to GABA permease gabA - <i>Aspergillus nidulans</i>                                             | 0.7                  |
| An12g09970 | similarity to hypothetical protein encoded by An12g02180 - <i>Aspergillus niger</i>                               | 0.7                  |
| An12g09270 | strong similarity to lactose permease Lac12 - <i>Kluyveromyces lactis</i>                                         | 0.7                  |
| An12g05370 | strong similarity to O-methyltransferase A omtA - <i>Aspergillus parasiticus</i>                                  | 0.7                  |
| An09g01810 | strong similarity to ketoreductase from patent EP918090-A - <i>Saccharomyces cerevisiae</i>                       | 0.7                  |
| An09g00960 | hypothetical protein                                                                                              | 0.7                  |
| An08g00850 | weak similarity to hypothetical protein encoded by An13g00450 - <i>Aspergillus niger</i>                          | 0.7                  |
| An07g05460 | strong similarity to hypothetical protein CAE47856.1 - <i>Aspergillus fumigatus</i>                               | 0.7                  |
| An07g03260 | similarity to hypothetical protein B15I20.50 - <i>Neurospora crassa</i>                                           | 0.7                  |
| An06g00170 | alpha-galactosidase aglA - <i>Aspergillus niger</i>                                                               | 0.7                  |
| An02g11180 | strong similarity to EST an_0208 - <i>Aspergillus niger</i>                                                       | 0.7                  |
| An02g03190 | similarity to monocarboxylate transporter MCT3 - <i>Rattus norvegicus</i>                                         | 0.7                  |
| An02g01030 | hypothetical protein                                                                                              | 0.7                  |
| An01g14000 | strong similarity to cyclohexanol dehydrogenase chnA - <i>Acinetobacter</i> sp.                                   | 0.7                  |
| An17g01450 | strong similarity to high-affinity nicotinic acid permease Tna1 - <i>Saccharomyces cerevisiae</i>                 | 0.65                 |
| An16g07260 | weak similarity to epithelial microtubule-associated protein E-MAP-115 - <i>Homo sapiens</i>                      | 0.65                 |
| An16g06270 | similarity to versicolorin reductase verA - <i>Aspergillus nidulans</i>                                           | 0.65                 |
| An16g05180 | hypothetical protein                                                                                              | 0.65                 |
| An16g01600 | similarity to monosaccharide transporter 1 pmt1 - <i>Petunia hybrida</i>                                          | 0.65                 |
| An15g06200 | similarity to transcriptional regulator molecule HTRM clone 693452 from patent WO9957144-A2 - <i>Homo sapiens</i> | 0.65                 |
| An15g02270 | hypothetical protein                                                                                              | 0.65                 |
| An15g02140 | weak similarity to dihydrofolate reductase dfr1p - <i>Schizosaccharomyces pombe</i>                               | 0.65                 |
| An15g02130 | strong similarity to lovastatin diketide synthase lovF - <i>Aspergillus terreus</i>                               | 0.65                 |
| An15g01900 | strong similarity to choline permease Hnm1 - <i>Saccharomyces cerevisiae</i>                                      | 0.65                 |
| An14g03850 | strong similarity to cytochrome P450 monooxygenase TRI4 - <i>Fusarium sporotrichioides</i>                        | 0.65                 |
| An14g02100 | strong similarity to cell wall antigen MP1 - <i>Penicillium marneffei</i>                                         | 0.65                 |
| An14g01370 | hypothetical protein                                                                                              | 0.65                 |
| An14g00600 | hypothetical protein                                                                                              | 0.65                 |
| An13g02730 | strong similarity to EST an_3461 - <i>Aspergillus niger</i>                                                       | 0.65                 |
| An13g00630 | similarity to protein CAP5 - <i>Colletotrichum gloeosporioides</i>                                                | 0.65                 |
| An12g10830 | similarity to hypothetical protein EAA74834.1 - <i>Gibberella zeae</i>                                            | 0.65                 |
| An12g05380 | strong similarity to cercosporin transporter CFP - <i>Cercospora kikuchii</i>                                     | 0.65                 |
| An12g02900 | similarity to heterokaryon incompatibility protein het-6 - <i>Neurospora crassa</i>                               | 0.65                 |
| An12g01820 | similarity to ubiquitin thiolesterase L3 - <i>Homo sapiens</i>                                                    | 0.65                 |
| An12g00710 | strong similarity to hypothetical protein CAD21276.1 - <i>Neurospora crassa</i>                                   | 0.65                 |
| An11g07040 | strong similarity to EST an_2779 - <i>Aspergillus niger</i>                                                       | 0.65                 |
| An11g06430 | similarity to integral membrane protein PTH11 - <i>Magnaporthe grisea</i>                                         | 0.65                 |
| An11g02980 | strong similarity to acetamidase amdS - <i>Aspergillus oryzae</i>                                                 | 0.65                 |
| An11g02950 | similarity to calpain nCL-3 from patent DE19650142-A1 - <i>Mus musculus</i>                                       | 0.65                 |
| An10g00560 | strong similarity to hypothetical protein binA - <i>Aspergillus nidulans</i>                                      | 0.65                 |
| An09g03010 | strong similarity to EST an_2241 - <i>Aspergillus niger</i>                                                       | 0.65                 |
| An09g02240 | strong similarity to beta-N-acetylhexosaminidase from patent WO9839459-A1 - <i>Penicillium chrysogenum</i>        | 0.65                 |
| An09g02180 | strong similarity to phospholipase A1 from patent JP10155493-A - <i>Aspergillus oryzae</i>                        | 0.65                 |

|            |                                                                                                            |      |
|------------|------------------------------------------------------------------------------------------------------------|------|
| An09g01880 | strong similarity to enoyl reductase of the lovastatin biosynthesis lovC - <i>Aspergillus terreus</i>      | 0.65 |
| An09g00160 | similarity to hypothetical protein Rv0839 - <i>Mycobacterium tuberculosis</i>                              | 0.65 |
| An08g10010 | hypothetical protein                                                                                       | 0.65 |
| An08g10000 | strong similarity to cytochrome b245 beta chain CYBB - <i>Homo sapiens</i> [putative frameshift]           | 0.65 |
| An08g08510 | strong similarity to aldehyde dehydrogenase ald3 - <i>Homo sapiens</i>                                     | 0.65 |
| An08g08480 | strong similarity to NADPH-dependent carbonyl reductase S1 - <i>Candida magnoliae</i>                      | 0.65 |
| An08g07920 | similarity to phenol 2-monooxygenase - <i>Trichosporon beigellii</i>                                       | 0.65 |
| An08g00170 | hypothetical protein                                                                                       | 0.65 |
| An07g07370 | weak similarity to PC-MYB2 - <i>Arabidopsis thaliana</i>                                                   | 0.65 |
| An07g04620 | strong similarity to hypothetical protein EAA60744.1 - <i>Aspergillus nidulans</i>                         | 0.65 |
| An07g04500 | hypothetical protein                                                                                       | 0.65 |
| An07g04350 | hypothetical protein                                                                                       | 0.65 |
| An07g04330 | similarity to heterokaryon incompatibility protein het-6 - <i>Neurospora crassa</i>                        | 0.65 |
| An07g03030 | strong similarity to EST SEQ ID NO:4127 from patent WO200056762-A2 - <i>Aspergillus niger</i>              | 0.65 |
| An07g00540 | similarity to hypothetical nucleoside-diphosphate-sugar epimerase AAM31397.1 - <i>Methanosarcina mazei</i> | 0.65 |
| An06g02120 | weak similarity to Tyk2 non-receptor tyrosine - <i>Mus musculus</i>                                        | 0.65 |
| An06g02110 | similarity to protein nompC - <i>Drosophila melanogaster</i>                                               | 0.65 |
| An06g00920 | hypothetical protein                                                                                       | 0.65 |
| An06g00620 | strong similarity to alpha-glucoside-hydrogen symporter Mal11 - <i>Saccharomyces cerevisiae</i>            | 0.65 |
| An06g00260 | strong similarity to hexose transporter Hxt5 - <i>Saccharomyces cerevisiae</i>                             | 0.65 |
| An05g01150 | hypothetical protein                                                                                       | 0.65 |
| An04g09490 | hypothetical protein                                                                                       | 0.65 |
| An04g03530 | strong similarity to NAD-dependent D-arabinitol dehydrogenase ard - <i>Candida tropicalis</i>              | 0.65 |
| An04g03340 | weak similarity to hypothetical syntaxin 8 related protein B13N20.240 - <i>Neurospora crassa</i>           | 0.65 |
| An03g05120 | strong similarity to sequence 247 from patent WO0100804 - <i>Corynebacterium glutamicum</i>                | 0.65 |
| An03g01220 | weak similarity to apyrase from patent GB2261878-A - <i>Shigella flexneri</i>                              | 0.65 |
| An02g13750 | strong similarity to glutaminase A gtaA - <i>Aspergillus oryzae</i>                                        | 0.65 |
| An02g11760 | strong similarity to EST SEQ ID NO:4214 from patent WO200056762-A2 - <i>Aspergillus niger</i>              | 0.65 |
| An02g10550 | strong similarity to endo-alpha-1,5-arabinanase abnA - <i>Aspergillus niger</i>                            | 0.65 |
| An02g10480 | similarity to chloride peroxidase cpo - <i>Leptoxylum fumago</i>                                           | 0.65 |
| An02g00590 | strong similarity to high-affinity glucose transporter HGT1 - <i>Kluyveromyces lactis</i>                  | 0.65 |
| An02g00580 | similarity to pyruvate dehydrogenase phosphatase PDPc - <i>Bos taurus</i>                                  | 0.65 |
| An02g00090 | strong similarity to prolidase - <i>Aureobacterium anophageum</i>                                          | 0.65 |
| An01g12550 | strong similarity to mannosyl-oligosaccharide 1,2-alpha-mannosidase msdS - <i>Aspergillus saitoi</i>       | 0.65 |
| An01g06780 | similarity to actVA-ORF4-like protein A-ORFP from patent WO9911793-A1 - <i>Homo sapiens</i>                | 0.65 |
| An01g05370 | similarity to hypothetical protein encoded by An09g04380 - <i>Aspergillus niger</i>                        | 0.65 |
| An01g04150 | strong similarity to hypothetical protein SPAC926.06c - <i>Schizosaccharomyces pombe</i>                   | 0.65 |
| An01g00510 | strong similarity to cytochrome P450 cyp52A3-a - <i>Candida maltosa</i>                                    | 0.65 |
| An16g07900 | strong similarity to choline permease Hnm1 - <i>Saccharomyces cerevisiae</i>                               | 0.65 |
| An14g02320 | weak similarity to splicing coactivator subunit SRm300 - <i>Homo sapiens</i>                               | 0.65 |
| An09g04850 | strong similarity to p-sulfobenzyl alcohol dehydrogenase TsaC - <i>Comamonas testosteroni</i>              | 0.65 |
| An04g08900 | strong similarity to hypothetical protein 68B2.50 - <i>Neurospora crassa</i>                               | 0.65 |
| An18g06780 | similarity to hypothetical protein B1O14.080 - <i>Neurospora crassa</i>                                    | 0.6  |
| An18g05100 | similarity to cytosine deaminase codA - <i>Escherichia coli</i>                                            | 0.6  |
| An18g03210 | strong similarity to quinone oxidoreductase P1 - <i>Arabidopsis thaliana</i>                               | 0.6  |

|            |                                                                                                                |     |
|------------|----------------------------------------------------------------------------------------------------------------|-----|
| An18g03040 | similarity to MAP kinase phosphatase XCL100(beta) - <i>Xenopus laevis</i>                                      | 0.6 |
| An18g01740 | strong similarity to aliphatic nitrilase - <i>Rhodococcus rhodochrous</i>                                      | 0.6 |
| An18g01180 | strong similarity to penicillin V amidohydrolase PVA from patent US5516679-A - <i>Fusarium oxysporum</i>       | 0.6 |
| An18g00960 | strong similarity to choline permease Hnm1 - <i>Saccharomyces cerevisiae</i>                                   | 0.6 |
| An18g00940 | strong similarity to FAD dependent L-sorbose dehydrogenase SDH - <i>Gluconobacter oxydans</i>                  | 0.6 |
| An18g00170 | weak similarity to kinesin - <i>Syncephalastrum racemosum</i>                                                  | 0.6 |
| An17g01070 | strong similarity to fluconazole resistance protein FLU1 - <i>Candida albicans</i> [putative frameshift]       | 0.6 |
| An16g09020 | strong similarity to hypothetical protein SPAC922.05c - <i>Schizosaccharomyces pombe</i>                       | 0.6 |
| An16g06100 | similarity to glutathione S-transferase GST1 - <i>Ascaris suum</i>                                             | 0.6 |
| An16g05550 | similarity to neutrophil oxidase factor - <i>Homo sapiens</i>                                                  | 0.6 |
| An16g03700 | strong similarity to phospholipase B from patent US6146869-A - <i>Aspergillus oryzae</i>                       | 0.6 |
| An16g03690 | strong similarity to iron and manganese transporter Ccc1 - <i>Saccharomyces cerevisiae</i>                     | 0.6 |
| An16g03290 | similarity to regulator protein Uga3 - <i>Saccharomyces cerevisiae</i>                                         | 0.6 |
| An16g02560 | strong similarity to hypothetical beta-lactamase XF1621 - <i>Xylella fastidiosa</i>                            | 0.6 |
| An16g02420 | weak similarity to hypothetical CG7701 - <i>Drosophila melanogaster</i>                                        | 0.6 |
| An16g01880 | strong similarity to lysophospholipase - <i>Aspergillus foetidus</i>                                           | 0.6 |
| An16g01610 | weak similarity to gamma-butyrobetaine hydroxylase BBH - <i>Rattus norvegicus</i>                              | 0.6 |
| An16g01220 | similarity to hypothetical protein CAD21096.1 - <i>Neurospora crassa</i>                                       | 0.6 |
| An15g07230 | similarity to mitochondrial thioredoxin from patent WO9832863-A2 - <i>Rattus sp.</i>                           | 0.6 |
| An15g06580 | uracil phosphoribosyltransferase furA - <i>Aspergillus niger</i>                                               | 0.6 |
| An15g05960 | weak similarity to hypothetical protein AAF54945.1 - <i>Drosophila melanogaster</i>                            | 0.6 |
| An15g03080 | similarity to BIR repeat containing ubiquitin-conjugating enzyme BRUCE - <i>Mus musculus</i>                   | 0.6 |
| An15g02150 | similarity to integral membrane protein PTH11 - <i>Magnaporthe grisea</i>                                      | 0.6 |
| An15g01200 | weak similarity to hypothetical protein PA3340 - <i>Pseudomonas aeruginosa</i>                                 | 0.6 |
| An14g06760 | similarity to hypothetical conserved protein SCIF3.07c - <i>Streptomyces coelicolor</i>                        | 0.6 |
| An14g06750 | strong similarity to hypothetical oxidoreductase PA0147 - <i>Pseudomonas aeruginosa</i>                        | 0.6 |
| An14g06630 | hypothetical protein                                                                                           | 0.6 |
| An14g05760 | strong similarity to cyclohexanol dehydrogenase chnA - <i>Acinetobacter sp.</i>                                | 0.6 |
| An14g05570 | similarity to EST an_3478 - <i>Aspergillus niger</i>                                                           | 0.6 |
| An14g03510 | strong similarity to sorbitol dehydrogenase SDH - <i>Rattus norvegicus</i>                                     | 0.6 |
| An14g03130 | hypothetical protein                                                                                           | 0.6 |
| An14g03110 | strong similarity to cytochrome P450 monooxygenase TRI4 - <i>Myrothecium roridum</i>                           | 0.6 |
| An13g01930 | strong similarity to succinate-semialdehyde dehydrogenase SSADH - <i>Rattus norvegicus</i>                     | 0.6 |
| An13g01800 | strong similarity to hypothetical protein encoded by An15g07140 - <i>Aspergillus niger</i>                     | 0.6 |
| An12g10840 | hypothetical protein                                                                                           | 0.6 |
| An12g07690 | similarity to transcription activator of lysine pathway Lys14 - <i>Saccharomyces cerevisiae</i>                | 0.6 |
| An12g05280 | weak similarity to esterase - <i>Boophilus microplus</i>                                                       | 0.6 |
| An11g09010 | weak similarity to choline kinase R2 CK-R2 - <i>Rattus norvegicus</i>                                          | 0.6 |
| An11g06450 | strong similarity to hypothetical protein encoded by An02g08300 - <i>Aspergillus niger</i>                     | 0.6 |
| An11g05400 | weak similarity to metacaspase casA - <i>Aspergillus nidulans</i>                                              | 0.6 |
| An11g05230 | similarity to hypothetical protein PA1213 - <i>Pseudomonas aeruginosa</i>                                      | 0.6 |
| An11g00210 | strong similarity to cyclohexanone monooxygenase chnB2 - <i>Brevibacterium sp.</i> [putative sequencing error] | 0.6 |
| An09g06000 | weak similarity to hypothetical membrane protein YJR151c - <i>Saccharomyces cerevisiae</i>                     | 0.6 |
| An09g04880 | hypothetical protein                                                                                           | 0.6 |

|            |                                                                                                                     |     |
|------------|---------------------------------------------------------------------------------------------------------------------|-----|
| An09g02760 | hypothetical protein                                                                                                | 0.6 |
| An08g11680 | strong similarity to 2,5-dichloro-2,5-cyclohexadiene-1,4-diol dehydrogenase linC - <i>Pseudomonas paucimobilis</i>  | 0.6 |
| An08g09970 | similarity to beta-transducin-like protein het-e - <i>Podospora anserina</i>                                        | 0.6 |
| An08g09840 | strong similarity to cysteine proteinase polypeptide from patent WO200268623-A2 - <i>Aspergillus niger</i>          | 0.6 |
| An08g09420 | strong similarity to protein 4MeS - <i>Metarhizium anisopliae</i>                                                   | 0.6 |
| An08g06430 | similarity to allantoate permease Dal5 - <i>Saccharomyces cerevisiae</i>                                            | 0.6 |
| An07g05830 | strong similarity to formamidase fmdS - <i>Aspergillus nidulans</i>                                                 | 0.6 |
| An07g05490 | strong similarity to stage V sporulation protein spoVK - <i>Bacillus subtilis</i>                                   | 0.6 |
| An07g04040 | similarity to hypothetical protein mlr7324 - <i>Mesorhizobium loti</i>                                              | 0.6 |
| An07g03110 | similarity to hypothetical protein CAD21104.1 - <i>Neurospora crassa</i>                                            | 0.6 |
| An07g02540 | similarity to carboxylic acid transport protein Jen1 - <i>Saccharomyces cerevisiae</i>                              | 0.6 |
| An07g01430 | strong similarity to hypothetical protein Rv1215c - <i>Mycobacterium tuberculosis</i>                               | 0.6 |
| An07g01340 | weak similarity to phosphoenolpyruvate carboxylase - <i>Escherichia coli</i>                                        | 0.6 |
| An07g01200 | strong similarity to enoyl reductase of the lovastatin biosynthesis lovC - <i>Aspergillus terreus</i>               | 0.6 |
| An06g02150 | similarity to hypothetical protein CAD70322.1 - <i>Neurospora crassa</i>                                            | 0.6 |
| An05g02210 | strong similarity to B-cell mitogen precursor PA45 - <i>Trypanosoma cruzi</i>                                       | 0.6 |
| An05g02050 | strong similarity to 3-oxoacyl-(acyl-carrier-protein) reductase srb - <i>Bacillus subtilis</i>                      | 0.6 |
| An05g01880 | strong similarity to hypothetical chloroperoxidase cpo - <i>Agaricus bisporus</i>                                   | 0.6 |
| An05g01720 | similarity to hypothetical protein CAD21295.1 - <i>Neurospora crassa</i>                                            | 0.6 |
| An05g00970 | hypothetical protein                                                                                                | 0.6 |
| An05g00480 | strong similarity to transcription factor involved in differentiation stuA - <i>Aspergillus nidulans</i>            | 0.6 |
| An04g10130 | 3-isopropylmalate dehydrogenase leu2B - <i>Aspergillus niger</i>                                                    | 0.6 |
| An04g10110 | similarity to hypothetical protein encoded by An11g00040 - <i>Aspergillus niger</i>                                 | 0.6 |
| An04g09990 | strong similarity to 2,5-dichloro-2,5-cyclohexadiene-1,4-diol dehydrogenase linC - <i>Sphingomonas paucimobilis</i> | 0.6 |
| An04g08890 | strong similarity to aryl-alcohol oxidase precursor aao - <i>Pleurotus eryngii</i>                                  | 0.6 |
| An04g08880 | similarity to hypothetical protein CAD60573.1 - <i>Podospora anserina</i>                                           | 0.6 |
| An04g08440 | strong similarity to cytochrome P450 monooxygenase TRI11 - <i>Fusarium sporotrichioides</i>                         | 0.6 |
| An04g07460 | strong similarity to ambiental pH regulatory system protein palFp - <i>Aspergillus nidulans</i>                     | 0.6 |
| An04g07430 | similarity to hypothetical protein encoded by An07g09430 - <i>Aspergillus niger</i>                                 | 0.6 |
| An04g07320 | similarity to dark repressor of conidiation velvet veA - <i>Aspergillus nidulans</i>                                | 0.6 |
| An04g04400 | similarity to tankyrase2 TANK2 from patent WO200100849-A1 - <i>Homo sapiens</i>                                     | 0.6 |
| An04g03180 | strong similarity to hypothetical protein EAA64005.1 - <i>Aspergillus nidulans</i>                                  | 0.6 |
| An04g00900 | weak similarity to beta transducin-like protein het-e1 - <i>Podospora anserina</i>                                  | 0.6 |
| An03g06480 | strong similarity to Steroid monooxygenase smo - <i>Rhodococcus rhodochrous</i>                                     | 0.6 |
| An03g05030 | hypothetical protein [truncated ORF]                                                                                | 0.6 |
| An03g01530 | strong similarity to xanthine dehydrogenase hxA - <i>Aspergillus nidulans</i>                                       | 0.6 |
| An03g01370 | strong similarity to hypothetical oxidoreductase of gene CC3685 - <i>Caulobacter crescentus</i>                     | 0.6 |
| An03g00970 | strong similarity to hypothetical protein encoded by An08g12110 - <i>Aspergillus niger</i>                          | 0.6 |
| An02g13240 | strong similarity to alpha-1-6-glucosidase glcA - <i>Aspergillus parasiticus</i>                                    | 0.6 |
| An02g12650 | hypothetical protein [truncated ORF]                                                                                | 0.6 |
| An02g08470 | similarity to hypothetical protein YGL079w - <i>Saccharomyces cerevisiae</i>                                        | 0.6 |
| An02g08230 | strong similarity to high affinity glucose transporter HGT1 - <i>Kluyveromyces lactis</i>                           | 0.6 |
| An02g07610 | strong similarity to mannitol transporter mat1 - <i>Apium graveolens</i>                                            | 0.6 |
| An02g05760 | weak similarity to glucan 1,4-alpha-glucosidase Muc1 - <i>Saccharomyces cerevisiae</i>                              | 0.6 |
| An02g04920 | similarity to hypothetical protein encoded by An09g02960 - <i>Aspergillus niger</i> [truncated ORF]                 | 0.6 |
| An02g02310 | similarity to bone sialoprotein precursor IBSP - <i>Homo sapiens</i>                                                | 0.6 |
| An01g12240 | strong similarity to hypothetical protein CAC28784.2 - <i>Neurospora crassa</i>                                     | 0.6 |

|            |                                                                                                                            |      |
|------------|----------------------------------------------------------------------------------------------------------------------------|------|
| An01g12170 | strong similarity to alcohol dehydrogenase alcB - <i>Aspergillus nidulans</i>                                              | 0.6  |
| An01g09020 | strong similarity to hypothetical protein ymaE - <i>Bacillus subtilis</i>                                                  | 0.6  |
| An01g06930 | strong similarity to polyketide synthase FUM5 - <i>Gibberella moniliformis</i>                                             | 0.6  |
| An01g06900 | weak similarity to transcription regulator of maltose utilization amyR - <i>Aspergillus oryzae</i>                         | 0.6  |
| An01g06890 | similarity to peptide synthase pesA - <i>Metarhizium anisopliae</i>                                                        | 0.6  |
| An01g06440 | similarity to hypothetical protein CAE28089.1/RPA2648 - <i>Rhodopseudomonas palustris</i>                                  | 0.6  |
| An01g04140 | similarity to EST an_2919 - <i>Aspergillus niger</i>                                                                       | 0.6  |
| An01g03330 | strong similarity to Pcl-like cyclin pclA - <i>Aspergillus nidulans</i>                                                    | 0.6  |
| An01g01950 | similarity to aluminium resistance protein Alr1 - <i>Saccharomyces cerevisiae</i>                                          | 0.6  |
| An01g01830 | strong similarity to catalase/peroxidase cpeB - <i>Streptomyces reticuli</i>                                               | 0.6  |
| An01g01720 | strong similarity to bleomycin hydrolase Blh1 - <i>Saccharomyces cerevisiae</i>                                            | 0.6  |
| An01g01030 | weak similarity to hypothetical protein encoded by An16g05360 - <i>Aspergillus niger</i>                                   | 0.6  |
| An15g04990 | similarity to EST an_2920 - <i>Aspergillus niger</i>                                                                       | 0.6  |
| An09g03470 | strong similarity to hypothetical verprolin related protein encoded by B24P7.40 - <i>Neurospora crassa</i>                 | 0.6  |
| An05g02260 | strong similarity to xylitol dehydrogenase xdh - <i>Galactocandida mastotermitis</i>                                       | 0.6  |
| An01g05100 | weak similarity to ribonucleoprotein B cp29B - <i>Nicotiana sylvestris</i>                                                 | 0.6  |
| An19g00290 | similarity to NAD+-dependent 15-hydroxyprostaglandin dehydrogenase PDGH - <i>Homo sapiens</i>                              | 0.55 |
| An18g06570 | strong similarity to hypothetical protein YGR266w - <i>Saccharomyces cerevisiae</i> [truncated ORF]                        | 0.55 |
| An18g05790 | hypothetical protein                                                                                                       | 0.55 |
| An18g05780 | similarity to lanthionine synthase C-like protein 1 LANCL1 - <i>Homo sapiens</i>                                           | 0.55 |
| An18g05500 | strong similarity to mitochondrial ceramidase AAF86240.1 - <i>Homo sapiens</i>                                             | 0.55 |
| An18g03630 | similarity to hypothetical protein encoded by An07g02000 - <i>Aspergillus niger</i>                                        | 0.55 |
| An18g03380 | strong similarity to mitochondrial thioredoxin Trx3 - <i>Saccharomyces cerevisiae</i>                                      | 0.55 |
| An18g02730 | similarity to transmembrane protein PTH11 - <i>Magnaporthe grisea</i>                                                      | 0.55 |
| An18g02510 | similarity to hypothetical protein SPAC31A2.16 - <i>Schizosaccharomyces pombe</i>                                          | 0.55 |
| An18g01200 | strong similarity to O-methylsterigmatocystin oxidoreductase ord1 - <i>Aspergillus flavus</i>                              | 0.55 |
| An17g02260 | similarity to hnf-3/forkhead transcription factor sep1p - <i>Schizosaccharomyces pombe</i> [deleted ORF]                   | 0.55 |
| An17g00550 | weak similarity to dTDP-glucose 4,6-dehydratase protein_id CAB05932.1 - <i>Streptococcus pneumoniae</i>                    | 0.55 |
| An16g09280 | weak similarity to hypothetical protein AAF79893.1 - <i>Arabidopsis thaliana</i>                                           | 0.55 |
| An16g09160 | strong similarity to EST AN05D03 - <i>Aspergillus niger</i>                                                                | 0.55 |
| An16g09010 | strong similarity to carboxypeptidase I protein from patent WO9814599-A1 - <i>Aspergillus oryzae</i> [putative frameshift] | 0.55 |
| An16g06830 | hypothetical protein                                                                                                       | 0.55 |
| An16g05640 | similarity to hypothetical protein encoded by An11g07160 - <i>Aspergillus niger</i>                                        | 0.55 |
| An16g04230 | strong similarity to general amino acid permease Gap1 - <i>Saccharomyces cerevisiae</i>                                    | 0.55 |
| An16g02820 | strong similarity to fatty acid omega-hydroxylase CYP505 - <i>Fusarium oxysporum</i>                                       | 0.55 |
| An16g02710 | hypothetical protein                                                                                                       | 0.55 |
| An16g02360 | strong similarity to pyridoxine 4-dehydrogenase PLR - <i>Schizosaccharomyces pombe</i>                                     | 0.55 |
| An16g02170 | epoxide hydrolase hyl1 - <i>Aspergillus niger</i>                                                                          | 0.55 |
| An16g01850 | similarity to blastomyces yeast phase-specific protein 1 bys1 - <i>Ajellomyces dermatitidis</i>                            | 0.55 |
| An16g00920 | strong similarity to peroxisomal membrane protein PMP20 - <i>Candida boidinii</i>                                          | 0.55 |
| An16g00750 | similarity to transcription activator Cha4 - <i>Saccharomyces cerevisiae</i>                                               | 0.55 |
| An15g04830 | similarity to vegetative incompatibility protein tol - <i>Neurospora crassa</i>                                            | 0.55 |
| An15g04220 | strong similarity to hypothetical protein EAA59582.1 - <i>Aspergillus nidulans</i>                                         | 0.55 |
| An15g04150 | strong similarity to oxidoreductase involved in actinorhodin production encoded by Orf11 - <i>Streptomyces lividans</i>    | 0.55 |
| An15g02930 | strong similarity to ABC transporter CDR4 - <i>Candida albicans</i>                                                        | 0.55 |

|            |                                                                                                                  |      |
|------------|------------------------------------------------------------------------------------------------------------------|------|
| An15g02470 | weak similarity to hypothetical variant surface glycoprotein MVAT5 homolog - Trypanosoma brucei                  | 0.55 |
| An15g01970 | similarity to unassigned homeobox protein Brn-3.2 - Mus sp.                                                      | 0.55 |
| An15g00120 | similarity to Wilms tumor susceptibility protein WT1 - Homo sapiens                                              | 0.55 |
| An14g06500 | strong similarity to glycerone kinase isoform I dak1p - Schizosaccharomyces pombe                                | 0.55 |
| An14g04910 | weak similarity to GABA-A receptor epsilon-like subunit epsilon - Rattus norvegicus                              | 0.55 |
| An14g04710 | aspartic proteinase aspergillopepsin I pepA - Aspergillus niger                                                  | 0.55 |
| An14g02090 | hypothetical protein                                                                                             | 0.55 |
| An14g00590 | similarity to tartrate transport protein ttuB - Agrobacterium vitis                                              | 0.55 |
| An14g00320 | hypothetical protein                                                                                             | 0.55 |
| An14g00170 | strong similarity to hypothetical Ca <sup>2+</sup> /H <sup>+</sup> antiporter YNL321w - Saccharomyces cerevisiae | 0.55 |
| An14g00160 | strong similarity to D-ribulokinase rbtK - Klebsiella pneumoniae                                                 | 0.55 |
| An13g03110 | strong similarity to high-affinity nicotinic acid permease Tna1 - Saccharomyces cerevisiae                       | 0.55 |
| An13g02780 | similarity to alpha-adducin alpha-ADD - Rattus norvegicus                                                        | 0.55 |
| An13g02090 | strong similarity to allantoin permease Dal5 - Saccharomyces cerevisiae                                          | 0.55 |
| An13g00980 | similarity to mucin-like protein Muc1 - Saccharomyces cerevisiae                                                 | 0.55 |
| An13g00320 | strong similarity to EST SEQ ID NO:4066 from patent WO200056762-A2 - Aspergillus niger                           | 0.55 |
| An12g09750 | strong similarity to hypothetical protein CAD70289.1 - Neurospora crassa                                         | 0.55 |
| An12g04460 | similarity to EST SEQ ID NO:4349 from patent WO200056762-A2 - Aspergillus niger                                  | 0.55 |
| An12g04090 | similarity to hypothetical protein encoded by An04g09490 - Aspergillus niger                                     | 0.55 |
| An12g02490 | weak similarity to aflatoxin biosynthesis regulator aflR - Aspergillus flavus                                    | 0.55 |
| An12g00010 | questionable ORF                                                                                                 | 0.55 |
| An11g10840 | strong similarity to GTPase Ras2p - Yarrowia lipolytica                                                          | 0.55 |
| An11g10260 | strong similarity to alphaN-acetylglucosamine transferase - Kluyveromyces lactis                                 | 0.55 |
| An11g09180 | similarity to mediator of mating-type-associated vegetative incompatibility tol - Neurospora crassa              | 0.55 |
| An11g07830 | strong similarity to hypothetical peptide transporter mtd1 - Schizophyllum commune                               | 0.55 |
| An11g07290 | similarity to spectinomycin adenylyltransferase spc - Staphylococcus aureus                                      | 0.55 |
| An11g06050 | hypothetical protein                                                                                             | 0.55 |
| An11g05110 | similarity to death-associated protein kinase DAPK1 - Homo sapiens                                               | 0.55 |
| An11g03120 | similarity to endo-1,4-beta-xylanase XynD - Bacillus polymyxa                                                    | 0.55 |
| An11g02570 | hypothetical protein [truncated ORF]                                                                             | 0.55 |
| An11g01550 | strong similarity to cytochrome P450 52A4 - Candida maltosa                                                      | 0.55 |
| An11g01220 | strong similarity to precursor of tannase - Aspergillus oryzae                                                   | 0.55 |
| An10g00350 | similarity to GTP cyclohydrolase II ribA - Actinobacillus pleuropneumoniae                                       | 0.55 |
| An09g06450 | strong similarity to hypothetical protein CAD71235.1 - Neurospora crassa [truncated ORF]                         | 0.55 |
| An09g06200 | strong similarity to transmembrane protein PTH11 - Magnaporthe grisea                                            | 0.55 |
| An09g04540 | strong similarity to hypothetical protein EAA63983.1 - Aspergillus nidulans [truncated ORF]                      | 0.55 |
| An09g03380 | similarity to hypothetical protein B24P7.110 - Neurospora crassa                                                 | 0.55 |
| An09g03330 | similarity to hypothetical protein encoded by SCE66.10c - Streptomyces coelicolor                                | 0.55 |
| An09g02830 | strong similarity to acylaminoacyl-peptidase DPP V - Aspergillus fumigatus                                       | 0.55 |
| An09g02560 | similarity to polyamine oxidase PAO - Zea mays                                                                   | 0.55 |
| An09g01190 | endo 1,5-alpha-arabinanase abnA - Aspergillus niger                                                              | 0.55 |
| An09g00710 | similarity to haloacetate dehalogenase H-1 - Moraxella sp.                                                       | 0.55 |
| An09g00680 | strong similarity to hypothetical protein SC9B2.03 - Streptomyces coelicolor                                     | 0.55 |
| An08g09940 | strong similarity to cytochrome P450 monooxygenase TRI11 - Fusarium sporotrichioides                             | 0.55 |
| An08g09780 | weak similarity to hypothetical protein SC8F4.26 - Streptomyces coelicolor                                       | 0.55 |
| An08g08930 | similarity to hypothetical protein CAE41807.1 - Bordetella pertussis                                             | 0.55 |

|            |                                                                                                       |      |
|------------|-------------------------------------------------------------------------------------------------------|------|
| An08g08440 | similarity to RNA-directed RNA polymerase RdRP - <i>Lycopersicon esculentum</i>                       | 0.55 |
| An08g08370 | similarity to alpha-1,2-mannosidase aman2 - <i>Bacillus</i> sp.                                       | 0.55 |
| An08g08250 | strong similarity to aryl-alcohol oxidase precursor aao - <i>Pleurotus pulmonarius</i>                | 0.55 |
| An08g05790 | strong similarity to glycogen phosphorylase Gph1 - <i>Saccharomyces cerevisiae</i>                    | 0.55 |
| An08g05350 | strong similarity to hypothetical protein encoded by An18g00300 - <i>Aspergillus niger</i>            | 0.55 |
| An08g05070 | similarity to hypothetical protein SCIF3.09c - <i>Streptomyces coelicolor</i>                         | 0.55 |
| An08g04490 | endoprotease Endo-Pro - <i>Aspergillus niger</i>                                                      | 0.55 |
| An08g04350 | similarity to chitin synthase III like Chs7 - <i>Saccharomyces cerevisiae</i>                         | 0.55 |
| An08g03060 | strong similarity to hypothetical protein CC0533 - <i>Caulobacter crescentus</i>                      | 0.55 |
| An08g02670 | strong similarity to EST an_3167 - <i>Aspergillus niger</i>                                           | 0.55 |
| An08g01950 | strong similarity to hypothetical 30.2 KD protein Y4OV - <i>Rhizobium</i> sp.                         | 0.55 |
| An07g09090 | weak similarity to hypothetical protein encoded by An18g02770 - <i>Aspergillus niger</i>              | 0.55 |
| An07g08980 | strong similarity to phosphatidylinositol 3-phosphate 5-kinase Fab1 - <i>Saccharomyces cerevisiae</i> | 0.55 |
| An07g08650 | hypothetical protein                                                                                  | 0.55 |
| An07g06480 | similarity to cytochrome 4F8 cyp4F8 - <i>Homo sapiens</i>                                             | 0.55 |
| An07g06310 | strong similarity to FAD dependent L-sorbose dehydrogenase SDH - <i>Gluconobacter oxydans</i>         | 0.55 |
| An07g06230 | hypothetical protein                                                                                  | 0.55 |
| An07g05970 | strong similarity to ankyrin Ank2 - <i>Homo sapiens</i>                                               | 0.55 |
| An07g04490 | weak similarity to trans-Golgi p230 - <i>Homo sapiens</i>                                             | 0.55 |
| An07g04480 | strong similarity to hypothetical protein EAA64298.1 - <i>Aspergillus nidulans</i>                    | 0.55 |
| An07g04120 | hypothetical protein                                                                                  | 0.55 |
| An07g04060 | strong similarity to EST SEQ ID NO:4312 from patent WO200056762-A2 - <i>Aspergillus niger</i>         | 0.55 |
| An07g03530 | hypothetical protein                                                                                  | 0.55 |
| An07g02060 | similarity to myo-inositol transporter 2 - <i>Schizosaccharomyces pombe</i>                           | 0.55 |
| An07g02050 | 2,3-dihydroxybenzoic acid decarboxylase dhbD - <i>Aspergillus niger</i>                               | 0.55 |
| An06g01050 | strong similarity to hypothetical protein SPAC17G6.02c - <i>Schizosaccharomyces pombe</i>             | 0.55 |
| An05g02410 | strong similarity to beta-glucuronidase GUSB - <i>Canis lupus</i>                                     | 0.55 |
| An05g01810 | strong similarity to 2-nitropropane dioxygenase precursor ncd-2 - <i>Neurospora crassa</i>            | 0.55 |
| An05g01490 | strong similarity to hypothetical protein PA3762 - <i>Pseudomonas aeruginosa</i>                      | 0.55 |
| An04g05880 | strong similarity to linoleate diol synthase - <i>Gaeumannomyces graminis</i>                         | 0.55 |
| An04g05780 | questionable ORF                                                                                      | 0.55 |
| An04g02700 | similarity to wheat raffinose synthase from patent WO200024915-A2 - <i>Triticum aestivum</i>          | 0.55 |
| An04g02670 | strong similarity to NADPH-dependent aldehyde reductase - <i>Sporobolomyces salmonicolor</i>          | 0.55 |
| An04g01430 | weak similarity to hypothetical protein encoded by B11A5.120 - <i>Neurospora crassa</i>               | 0.55 |
| An04g00340 | strong similarity to myo-inositol transport protein Itr2 - <i>Saccharomyces cerevisiae</i>            | 0.55 |
| An03g06670 | weak similarity to myosin-like protein Mlp1 - <i>Saccharomyces cerevisiae</i>                         | 0.55 |
| An03g06660 | strong similarity to peptide transporter PTR2 - <i>Arabidopsis thaliana</i>                           | 0.55 |
| An03g06330 | strong similarity to 2,3-dihydroxybiphenyl-1,2-dioxygenase bphC - <i>Pseudomonas stutzeri</i>         | 0.55 |
| An03g06140 | strong similarity to hypothetical protein encoded by 123A4.300 - <i>Neurospora crassa</i>             | 0.55 |
| An03g06090 | strong similarity to molasses resistency protein Rtm1 - <i>Saccharomyces cerevisiae</i>               | 0.55 |
| An03g05040 | similarity to EST an_2087 - <i>Aspergillus niger</i>                                                  | 0.55 |
| An03g04480 | hypothetical protein                                                                                  | 0.55 |
| An03g02800 | strong similarity to EST an_2890 - <i>Aspergillus niger</i>                                           | 0.55 |
| An03g02300 | strong similarity to metal-activated pyridoxal enzyme D-threonine aldolase - <i>Arthrobacter</i> sp.  | 0.55 |
| An03g01460 | strong similarity to gibberellin 7-oxidase - <i>Cucurbita maxima</i>                                  | 0.55 |

|            |                                                                                                                 |      |
|------------|-----------------------------------------------------------------------------------------------------------------|------|
| An03g00330 | hypothetical protein                                                                                            | 0.55 |
| An02g13980 | strong similarity to trichodiene oxygenase cytochrome P450 CYP58 - <i>Fusarium sporotrichioides</i>             | 0.55 |
| An02g13800 | strong similarity to hypothetical membrane protein YPR157w - <i>Saccharomyces cerevisiae</i>                    | 0.55 |
| An02g12600 | similarity to hypothetical hydrolase MJ0301 - <i>Methanococcus jannaschii</i>                                   | 0.55 |
| An02g11150 | alpha-galactosidase aglB - <i>Aspergillus niger</i>                                                             | 0.55 |
| An02g08570 | strong similarity to isopenicillin N acyltransferase aAT - <i>Aspergillus nidulans</i>                          | 0.55 |
| An02g07940 | strong similarity to hypothetical protein YEL023c - <i>Saccharomyces cerevisiae</i>                             | 0.55 |
| An02g07410 | hypothetical protein                                                                                            | 0.55 |
| An02g05240 | strong similarity to histone 4 from patent WO9919502-A1 - <i>Homo sapiens</i>                                   | 0.55 |
| An02g05120 | hypothetical protein                                                                                            | 0.55 |
| An02g04850 | similarity to protein SEQ ID NO:7804 from patent WO200253728-A2 - <i>Candida albicans</i>                       | 0.55 |
| An02g03740 | weak similarity to protein-tyrosine kinase erbB2 - <i>Homo sapiens</i>                                          | 0.55 |
| An02g03380 | strong similarity to hypothetical protein EAA61757.1 - <i>Aspergillus nidulans</i>                              | 0.55 |
| An02g01550 | strong similarity to secreted serine protease 19 kDa CS antigen CS-Ag - <i>Coccidioides immitis</i>             | 0.55 |
| An02g01260 | weak similarity to beta transducin-like protein het-e1 - <i>Podospora anserina</i>                              | 0.55 |
| An02g00080 | strong similarity to NAD-GSH-dependent formaldehyde dehydrogenase flhA - <i>Paracoccus denitrificans</i>        | 0.55 |
| An01g14940 | similarity to nonhemolytic phospholipase C PC-PLC - <i>Burkholderia pseudomallei</i>                            | 0.55 |
| An01g14520 | strong similarity to carbohydrate oxidase CHO from patent WO9931990-A1 - <i>Microdochium nivale</i>             | 0.55 |
| An01g13700 | similarity to calcineurin responsive zinc-finger transcription factor Crz1 - <i>Saccharomyces cerevisiae</i>    | 0.55 |
| An01g13000 | strong similarity to glu/asp-tRNA amidotransferase subunit A gatA - <i>Thermus thermophilus</i>                 | 0.55 |
| An01g12050 | similarity to 15-decalonectrin 15-O-acetyltransferase TRI3 - <i>Fusarium sporotrichioides</i>                   | 0.55 |
| An01g11580 | similarity to hypothetical protein encoded by An01g11570 - <i>Aspergillus niger</i>                             | 0.55 |
| An01g10930 | strong similarity to enzyme with sugar transferase activity from patent JP11009276-A - <i>Acremonium</i> sp.    | 0.55 |
| An01g10920 | strong similarity to sorbitol dehydrogenase SDH - <i>Rattus norvegicus</i>                                      | 0.55 |
| An01g07660 | similarity to hypothetical protein B7F18.80 - <i>Neurospora crassa</i>                                          | 0.55 |
| An01g06880 | similarity to dihydroflavonol 4-reductase BAA12723.1 - <i>Rosa</i> hybrid cultivar                              | 0.55 |
| An01g06710 | similarity to hypothetical phosphorylase AAM06921.1 - <i>Methanosarcina acetivorans</i>                         | 0.55 |
| An01g05600 | hypothetical protein                                                                                            | 0.55 |
| An01g05360 | strong similarity to 42 kDa endochitinase Tham-ch - <i>Trichoderma hamatum</i>                                  | 0.55 |
| An01g04530 | similarity to hypothetical MAP3K protein kinase-like protein MLD14.3 - <i>Arabidopsis thaliana</i>              | 0.55 |
| An01g01000 | similarity to hypothetical protein BAC11036.1 - <i>Homo sapiens</i>                                             | 0.55 |
| An18g01700 | strong similarity to quinate transport protein qutD - <i>Aspergillus nidulans</i>                               | 0.55 |
| An16g01930 | hypothetical protein                                                                                            | 0.55 |
| An16g01690 | similarity to X-linked PEST-containing monocarboxylate transporter XPCT - <i>Homo sapiens</i>                   | 0.55 |
| An15g06780 | similarity to vesicular acetylcholine transporter VAcHT - <i>Homo sapiens</i>                                   | 0.55 |
| An15g02280 | similarity to WW domain-containing oxidoreductase WOX1 - <i>Mus musculus</i>                                    | 0.55 |
| An11g06440 | strong similarity to enoyl reductase of the lovastatin biosynthesis lovC - <i>Aspergillus terreus</i>           | 0.55 |
| An04g00040 | strong similarity to S-malonyltransferase fabD - <i>Bacillus subtilis</i>                                       | 0.55 |
| An02g11720 | strong similarity to alpha-mannosidase msd2 - <i>Aspergillus nidulans</i>                                       | 0.55 |
| An02g02080 | hypothetical protein                                                                                            | 0.55 |
| An02g01330 | similarity to hypothetical nadh-dependent flavin oxidoreductase SPBC23G7.10c - <i>Schizosaccharomyces pombe</i> | 0.55 |
| An01g11780 | weak similarity to dATP pyrophosphohydrolase NMB0642 - <i>Neisseria meningitidis</i>                            | 0.55 |
| An19g00300 | strong similarity to kinesin light chain KLC - <i>Plectonema boryanum</i>                                       | 0.5  |



|            |                                                                                                                    |     |
|------------|--------------------------------------------------------------------------------------------------------------------|-----|
| An19g00210 | similarity to hemolysin ASP-HS - <i>Aspergillus fumigatus</i>                                                      | 0.5 |
| An18g06310 | strong similarity to L-fucose permease fucP - <i>Escherichia coli</i>                                              | 0.5 |
| An18g05210 | similarity to multifunctional beta-oxidation protein - <i>Neurospora crassa</i>                                    | 0.5 |
| An18g03170 | strong similarity to cyclin-dependent protein kinase Pho85 - <i>Saccharomyces cerevisiae</i>                       | 0.5 |
| An18g02770 | weak similarity to hypothetical protein encoded by An07g09090 - <i>Aspergillus niger</i>                           | 0.5 |
| An18g02600 | hypothetical protein                                                                                               | 0.5 |
| An18g02150 | similarity to hypothetical protein CAF05965.1 - <i>Neurospora crassa</i>                                           | 0.5 |
| An18g01010 | strong similarity to fluconazole resistance protein FLU1 - <i>Candida albicans</i>                                 | 0.5 |
| An18g01000 | strong similarity to EST an_2192 - <i>Aspergillus niger</i>                                                        | 0.5 |
| An18g00340 | hypothetical protein                                                                                               | 0.5 |
| An17g02370 | strong similarity to uracil phosphoribosyltransferase Fur1 - <i>Saccharomyces cerevisiae</i> [putative frameshift] | 0.5 |
| An17g00620 | hypothetical protein                                                                                               | 0.5 |
| An17g00180 | hypothetical protein                                                                                               | 0.5 |
| An16g07920 | strong similarity to hypothetical protein EAA64623.1 - <i>Aspergillus nidulans</i>                                 | 0.5 |
| An16g07710 | similarity to cocaine esterase cocE - <i>Rhodococcus</i> sp.                                                       | 0.5 |
| An16g07500 | strong similarity to acetamidase amdS - <i>Aspergillus nidulans</i>                                                | 0.5 |
| An16g07150 | strong similarity to soluble cytoplasmic fumarate reductase YEL047c - <i>Saccharomyces cerevisiae</i>              | 0.5 |
| An16g06740 | strong similarity to cadmium resistance protein Ycf1 - <i>Saccharomyces cerevisiae</i> [truncated ORF]             | 0.5 |
| An16g05340 | similarity to trans-2-enoyl-ACP reductase II fabK - <i>Streptococcus pneumoniae</i>                                | 0.5 |
| An16g04500 | strong similarity to meiosis control kinase ran1p - <i>Schizosaccharomyces pombe</i>                               | 0.5 |
| An16g04220 | similarity to 2-haloacid halidohydrolase IVa - <i>Pseudomonas cepacia</i>                                          | 0.5 |
| An16g04060 | similarity to hypothetical protein BAB55393.1 - <i>Homo sapiens</i>                                                | 0.5 |
| An16g04040 | weak similarity to membrane protein yeeO - <i>Escherichia coli</i>                                                 | 0.5 |
| An16g03270 | hypothetical protein                                                                                               | 0.5 |
| An16g03040 | strong similarity to hypothetical AMMECR1 - <i>Homo sapiens</i>                                                    | 0.5 |
| An16g02760 | strong similarity to hypothetical protein BH0842 - <i>Bacillus halodurans</i>                                      | 0.5 |
| An16g01680 | strong similarity to glutathione S-transferase III GST3 - <i>Zea mays</i>                                          | 0.5 |
| An16g01630 | strong similarity to enoyl reductase of the lovastatin biosynthesis lovC - <i>Aspergillus terreus</i>              | 0.5 |
| An16g01490 | similarity to ubiquitin carboxyl-terminal hydrolase uch2p - <i>Schizosaccharomyces pombe</i>                       | 0.5 |
| An16g01020 | similarity to hypothetical transcription regulator SPBC530.05 - <i>Schizosaccharomyces pombe</i>                   | 0.5 |
| An16g00830 | similarity to hypothetical protein encoded by An14g02830 - <i>Aspergillus niger</i>                                | 0.5 |
| An16g00810 | strong similarity to oligopeptide transporter Opt1 - <i>Saccharomyces cerevisiae</i>                               | 0.5 |
| An15g07200 | similarity to hypothetical transmembrane protein - <i>Erysiphe pisi</i>                                            | 0.5 |
| An15g07090 | strong similarity to hypothetical protein encoded by An12g10350 - <i>Aspergillus niger</i>                         | 0.5 |
| An15g06560 | weak similarity to hypothetical proline-rich protein T20D16.24 - <i>Arabidopsis thaliana</i>                       | 0.5 |
| An15g02590 | strong similarity to dimethylglycine dehydrogenase precursor DMGDH - <i>Homo sapiens</i>                           | 0.5 |
| An15g01580 | weak similarity to cell envelope protein 05ae20220orf32 from patent WO9640893-A1 - <i>Helicobacter pylori</i>      | 0.5 |
| An15g01220 | hypothetical protein                                                                                               | 0.5 |
| An15g00280 | strong similarity to hypothetical protein jhp0295 - <i>Helicobacter pylori</i>                                     | 0.5 |
| An14g07190 | similarity to hypothetical protein CAD21260.1 - <i>Neurospora crassa</i>                                           | 0.5 |
| An14g05840 | strong similarity to O-methyltransferase omtB - <i>Aspergillus flavus</i>                                          | 0.5 |
| An14g05480 | hypothetical protein                                                                                               | 0.5 |
| An14g05410 | strong similarity to hypothetical protein CAD21189.1 - <i>Neurospora crassa</i>                                    | 0.5 |
| An14g04550 | hypothetical protein                                                                                               | 0.5 |
| An14g04240 | strong similarity to hypothetical conserved protein CC0533 - <i>Caulobacter crescentus</i>                         | 0.5 |

|            |                                                                                                                               |     |
|------------|-------------------------------------------------------------------------------------------------------------------------------|-----|
| An14g04190 | strong similarity to 1,4-alpha-glucan branching enzyme Glc3 - <i>Saccharomyces cerevisiae</i>                                 | 0.5 |
| An14g03090 | strong similarity to glucose/galactose transporter gluP - <i>Brucella abortus</i>                                             | 0.5 |
| An14g02470 | strong similarity to protein PRO304 from patent WO200104311-A1 - <i>Homo sapiens</i>                                          | 0.5 |
| An14g02140 | weak similarity to Ca-dependent protein kinase CDPK1 - <i>Marchantia polymorpha</i>                                           | 0.5 |
| An14g02080 | strong similarity to prolidase - <i>Aureobacterium anophageum</i>                                                             | 0.5 |
| An14g01790 | hypothetical protein                                                                                                          | 0.5 |
| An14g01680 | similarity to monocarboxylate transporter MCT3 - <i>Rattus norvegicus</i>                                                     | 0.5 |
| An14g01660 | strong similarity to cyclohexanone monooxygenase chnB2 - <i>Brevibacterium sp.</i>                                            | 0.5 |
| An14g01520 | similarity to hypothetical protein encoded by An12g09920 - <i>Aspergillus niger</i>                                           | 0.5 |
| An14g00640 | strong similarity to hypothetical protein EAA61679.1 - <i>Aspergillus nidulans</i>                                            | 0.5 |
| An13g03600 | strong similarity to phosphatidylcholine-hydrolyzing phospholipase C PLCN - <i>Burkholderia pseudomallei</i>                  | 0.5 |
| An13g02410 | weak similarity to hypothetical cation transporter DRA0361 - <i>Deinococcus radiodurans</i>                                   | 0.5 |
| An13g02080 | strong similarity to ATP-hydrolyzing 5-oxoprolinase - <i>Rattus norvegicus</i>                                                | 0.5 |
| An13g00950 | strong similarity to alcohol dehydrogenase alcB - <i>Aspergillus nidulans</i>                                                 | 0.5 |
| An13g00130 | hypothetical protein                                                                                                          | 0.5 |
| An12g10630 | similarity to acid phosphatase aphA - <i>Aspergillus ficuum</i>                                                               | 0.5 |
| An12g10220 | similarity to leucoanthocyanidin dioxygenase LDOX - <i>Vitis vinifera</i>                                                     | 0.5 |
| An12g10030 | weak similarity to membrane protein YIL140w Rev7 - <i>Saccharomyces cerevisiae</i>                                            | 0.5 |
| An12g09190 | similarity to nucleic acid-binding protein NuABP-10 from patent WO200044900-A2 - <i>Homo sapiens</i>                          | 0.5 |
| An12g09180 | hypothetical protein                                                                                                          | 0.5 |
| An12g08620 | strong similarity to MFS drug transporter Bcmfs1 - <i>Botryotinia fuckeliana</i>                                              | 0.5 |
| An12g08270 | strong similarity to L-lactate 2-monooxygenase LA2M - <i>Mycobacterium smegmatis</i>                                          | 0.5 |
| An12g07860 | strong similarity to esterase P1-8LC from patent WO9730160-A1 - <i>Sulfolobus solfataricus</i>                                | 0.5 |
| An12g05360 | strong similarity to cholesterol 24-hydroxylase - <i>Mus musculus</i>                                                         | 0.5 |
| An12g05220 | similarity to transcription factor nft1p - <i>Schizosaccharomyces pombe</i>                                                   | 0.5 |
| An12g04990 | strong similarity to glucitol 6-phosphate dehydrogenase gutD - <i>Clostridium beijerinckii</i>                                | 0.5 |
| An12g03760 | similarity to hypothetical protein encoded by An12g03780 - <i>Aspergillus niger</i>                                           | 0.5 |
| An12g03500 | weak similarity to hypothetical protein CAD71089.1 - <i>Neurospora crassa</i>                                                 | 0.5 |
| An12g03460 | strong similarity to proline permease prnB - <i>Aspergillus nidulans</i>                                                      | 0.5 |
| An12g03280 | hypothetical protein                                                                                                          | 0.5 |
| An12g02180 | similarity to hypothetical protein encoded by An12g09970 - <i>Aspergillus niger</i>                                           | 0.5 |
| An12g01950 | strong similarity to hypothetical protein CAD60583.1 - <i>Podospira anserina</i>                                              | 0.5 |
| An12g01870 | similarity to positive regulator of the lactose-galactose regulon LAC9 - <i>Kluyveromyces fragilis</i>                        | 0.5 |
| An12g01850 | strong similarity to glycosidase from patent WO9824799-A1 - <i>Thermotoga maritima</i>                                        | 0.5 |
| An12g01540 | similarity to hypothetical protein dJ1042K10.5 - <i>Homo sapiens</i>                                                          | 0.5 |
| An12g00850 | similarity to beta transducin-like protein het-e1 - <i>Podospira anserina</i>                                                 | 0.5 |
| An12g00600 | similarity to monodehydroascorbate reductase MDA - <i>Cucumis sativus</i>                                                     | 0.5 |
| An11g11320 | strong similarity to protein involved in autophagy Aut2 - <i>Saccharomyces cerevisiae</i>                                     | 0.5 |
| An11g11220 | hypothetical protein                                                                                                          | 0.5 |
| An11g11130 | strong similarity to 26S proteasome-associated ubiquitin carboxyl-terminal hydrolase uch2p - <i>Schizosaccharomyces pombe</i> | 0.5 |
| An11g10780 | similarity to hypothetical conserved protein B8L3.060 - <i>Neurospora crassa</i> [truncated ORF]                              | 0.5 |
| An11g10160 | strong similarity to hypothetical oxetanocin A resistance protein oxrB - <i>Bacillus megaterium</i>                           | 0.5 |
| An11g09240 | similarity to Gpi-anchored aspartic protease Yps1 - <i>Saccharomyces cerevisiae</i>                                           | 0.5 |
| An11g07940 | hypothetical protein                                                                                                          | 0.5 |
| An11g07720 | hypothetical protein                                                                                                          | 0.5 |

|            |                                                                                                                   |     |
|------------|-------------------------------------------------------------------------------------------------------------------|-----|
| An11g07060 | weak similarity to actinomycin synthase III acmC - <i>Streptomyces chrysomallus</i>                               | 0.5 |
| An11g07030 | similarity to plasma membrane protein Pth11 - <i>Magnaporthe grisea</i>                                           | 0.5 |
| An11g03780 | strong similarity to hypothetical transcription regulator SPBC530.05 - <i>Schizosaccharomyces pombe</i>           | 0.5 |
| An11g03640 | strong similarity to transmembrane oligopeptide transporter OPT1 - <i>Candida albicans</i>                        | 0.5 |
| An11g03450 | strong similarity to hypothetical protein dag11 - <i>Agaricus bisporus</i>                                        | 0.5 |
| An11g03240 | strong similarity to NAD-dependent D-arabinitol dehydrogenase ard - <i>Candida tropicalis</i>                     | 0.5 |
| An11g03100 | strong similarity to cyclin-dependent protein kinase phoa - <i>Aspergillus nidulans</i>                           | 0.5 |
| An11g02700 | similarity to transcriptional activator Haa1 - <i>Saccharomyces cerevisiae</i>                                    | 0.5 |
| An11g02540 | strong similarity to mitochondrial 2-oxoglutarate/malate translocator clone OMT103 - <i>Panicum miliaceum</i>     | 0.5 |
| An11g01970 | similarity to pyroglutamyl-peptidase I PGPI - <i>Pyrococcus furiosus</i>                                          | 0.5 |
| An11g01720 | strong similarity to high-affinity nicotinic acid permease Tna1 - <i>Saccharomyces cerevisiae</i>                 | 0.5 |
| An11g01480 | weak similarity to hypothetical RNA polymerase - Pelargonium leaf curl virus                                      | 0.5 |
| An11g01250 | weak similarity to cyclin-dependent kinase Cdk8 - <i>Drosophila melanogaster</i>                                  | 0.5 |
| An11g01200 | similarity to hypothetical protein CAD21260.1 - <i>Neurospora crassa</i>                                          | 0.5 |
| An09g04360 | weak similarity to hypothetical protein SPy1903 - <i>Streptococcus pyogenes</i>                                   | 0.5 |
| An09g04010 | strong similarity to chitin synthase C chsC - <i>Aspergillus fumigatus</i>                                        | 0.5 |
| An09g03730 | strong similarity to acyl CoA dehydrogenase aidB - <i>Escherichia coli</i>                                        | 0.5 |
| An09g02090 | weak similarity to hypothetical protein encoded by An12g05320 - <i>Aspergillus niger</i>                          | 0.5 |
| An09g01820 | strong similarity to 4-coumarate-CoA ligase 4CL - <i>Arabidopsis thaliana</i>                                     | 0.5 |
| An09g01050 | similarity to platelet-activating factor-acetylhydrolase - <i>Cavia porcellus</i>                                 | 0.5 |
| An08g10210 | weak similarity to suppressor protein SEF1 - <i>Kluyveromyces lactis</i>                                          | 0.5 |
| An08g10190 | weak similarity to hypothetical protein VeA - <i>Neurospora crassa</i>                                            | 0.5 |
| An08g09850 | strong similarity to phosphate-repressible acid phosphatase precursor phoA - <i>Penicillium chrysogenum</i>       | 0.5 |
| An08g08910 | strong similarity to mitochondrial sulfite oxidase SUOX - <i>Homo sapiens</i>                                     | 0.5 |
| An08g08400 | strong similarity to toluenesulfonate zinc-independent alcohol dehydrogenase TsaC - <i>Comamonas testosteroni</i> | 0.5 |
| An08g07320 | strong similarity to hypothetical conserved protein SCD10.11 - <i>Streptomyces coelicolor</i>                     | 0.5 |
| An08g07280 | strong similarity to methicillin resistance gene HmrA - <i>Staphylococcus aureus</i>                              | 0.5 |
| An08g06730 | weak similarity to hypothetical protein CAD29600.1 - <i>Aspergillus fumigatus</i>                                 | 0.5 |
| An08g06250 | strong similarity to benzoate 4-monooxygenase cytochrome P450 53 bphA - <i>Aspergillus niger</i>                  | 0.5 |
| An08g05230 | strong similarity to hypothetical endoglucanase IV - <i>Trichoderma reesei</i>                                    | 0.5 |
| An08g04040 | strong similarity to quinate transport protein qutD - <i>Aspergillus nidulans</i>                                 | 0.5 |
| An08g03360 | strong similarity to protein kinase kin1p - <i>Schizosaccharomyces pombe</i>                                      | 0.5 |
| An08g02330 | strong similarity to multidrug resistance protein MLP-2 - <i>Rattus norvegicus</i>                                | 0.5 |
| An08g02090 | hypothetical protein                                                                                              | 0.5 |
| An08g01810 | similarity to S-layer protein - <i>Clostridium thermocellum</i> [truncated ORF]                                   | 0.5 |
| An08g01710 | strong similarity to alpha-L-arabinofuranosidase abfA - <i>Bacillus stearothermophilus</i>                        | 0.5 |
| An08g01500 | weak similarity to hypothetical protein T4D2.50 - <i>Arabidopsis thaliana</i>                                     | 0.5 |
| An08g00540 | strong similarity to EST SEQ ID NO:4140 from patent WO200056762-A2 - <i>Aspergillus niger</i>                     | 0.5 |
| An07g10020 | strong similarity to microtubule-associated protein Aut7 - <i>Saccharomyces cerevisiae</i>                        | 0.5 |
| An07g09590 | strong similarity to glutathione S-transferase GST from patent US5962229-A - <i>Zea mays</i>                      | 0.5 |
| An07g09060 | strong similarity to hypothetical protein CAE76244.1 - <i>Neurospora crassa</i>                                   | 0.5 |
| An07g08630 | strong similarity to hypothetical protein At2g25280 - <i>Arabidopsis thaliana</i>                                 | 0.5 |
| An07g08200 | weak similarity to secreted form of protein F - Human respiratory syncytial virus                                 | 0.5 |
| An07g07700 | similarity to hypothetical glycosyl hydrolase BAC68337.1 - <i>Streptomyces avermitilis</i>                        | 0.5 |

|            |                                                                                                                |     |
|------------|----------------------------------------------------------------------------------------------------------------|-----|
| An07g06780 | strong similarity to hypothetical phosphomannomutase homolog - Schizosaccharomyces pombe                       | 0.5 |
| An07g06400 | strong similarity to copper amine oxidase AO-I - Aspergillus niger                                             | 0.5 |
| An07g06150 | strong similarity to lanosterol synthase erg7p - Schizosaccharomyces pombe                                     | 0.5 |
| An07g05840 | strong similarity to multidrug resistance protein Hol1 - Saccharomyces cerevisiae                              | 0.5 |
| An07g05210 | strong similarity to long-chain-fatty-acid acyl-CoA ligase fenL - Bacillus subtilis                            | 0.5 |
| An07g05020 | weak similarity to regulator protein Uga3 - Saccharomyces cerevisiae                                           | 0.5 |
| An07g04650 | similarity to glucan 1,3-beta-glucosidase Bgl2 - Saccharomyces cerevisiae                                      | 0.5 |
| An07g04360 | hypothetical protein                                                                                           | 0.5 |
| An07g04320 | strong similarity to NAD-dependent D-arabinitol dehydrogenase ard - Candida tropicalis                         | 0.5 |
| An07g04160 | strong similarity to FLO11 gene expression regulator An34 from patent WO200257456-A2 - Unclassified organism   | 0.5 |
| An07g02950 | hypothetical protein                                                                                           | 0.5 |
| An07g02880 | strong similarity to hypothetical protein EAA57627.1 - Aspergillus nidulans                                    | 0.5 |
| An07g01690 | weak similarity to hypothetical protein CAC28841.2 - Neurospora crassa                                         | 0.5 |
| An07g01410 | hypothetical protein                                                                                           | 0.5 |
| An07g00150 | strong similarity to multidrug transporter bmr3 - Bacillus subtilis                                            | 0.5 |
| An06g01890 | similarity to histidine triad protein Hnt1 - Saccharomyces cerevisiae                                          | 0.5 |
| An06g01440 | similarity to heterogeneous nuclear ribonucleoprotein (hnRNP) Tom34 - Saccharomyces cerevisiae                 | 0.5 |
| An06g00930 | weak similarity to hypothetical protein CAD21295.1 - Neurospora crassa                                         | 0.5 |
| An06g00500 | hypothetical protein                                                                                           | 0.5 |
| An06g00200 | hypothetical protein                                                                                           | 0.5 |
| An05g02280 | similarity to esterase from patent WO9802556-A2 - Alcaligenes sp.                                              | 0.5 |
| An05g00390 | strong similarity to acetyl coenzyme A synthase - Tetrahymena pyriformis                                       | 0.5 |
| An05g00300 | similarity to microsomal cytochrome b5 cytb5 - Musca domestica                                                 | 0.5 |
| An05g00190 | similarity to cyclin like protein Pcl7 - Saccharomyces cerevisiae                                              | 0.5 |
| An05g00020 | weak similarity to transcription factor Ume6 - Saccharomyces cerevisiae                                        | 0.5 |
| An04g09900 | strong similarity to hypothetical protein encoded by An07g06270 - Aspergillus niger                            | 0.5 |
| An04g08730 | strong similarity to hypothetical conserved protein SPAC12B10.16c - Schizosaccharomyces pombe                  | 0.5 |
| An04g08620 | similarity to heme activator protein Hap1 - Saccharomyces cerevisiae                                           | 0.5 |
| An04g06000 | similarity to transcription activator Put3 - Saccharomyces cerevisiae                                          | 0.5 |
| An04g05280 | similarity to mucin-like protein Muc1 - Saccharomyces cerevisiae                                               | 0.5 |
| An04g05070 | hypothetical protein                                                                                           | 0.5 |
| An04g05060 | similarity to protein XFIN - Xenopus laevis                                                                    | 0.5 |
| An04g04340 | strong similarity to nonaketide synthase lovB - Aspergillus terreus                                            | 0.5 |
| An04g03440 | similarity to novel polypeptide sequence SEQ ID NO:1786 from patent WO2003029271-A2 - Homo sapiens             | 0.5 |
| An04g03290 | strong similarity to long-chain acyl-CoA dehydrogenase - Rattus norvegicus                                     | 0.5 |
| An04g02840 | strong similarity to flavocytochrome b2 L-lactate dehydrogenase CYB2 - Pichia anomala [putative frameshift]    | 0.5 |
| An04g02300 | similarity to trans-2-enoyl-ACP reductase II fabK - Streptococcus pneumoniae                                   | 0.5 |
| An04g00550 | strong similarity to EST an_1834 - Aspergillus niger                                                           | 0.5 |
| An03g06980 | similarity to hypothetical protein B24M22.160 - Neurospora crassa [truncated ORF]                              | 0.5 |
| An03g06460 | strong similarity to hypothetical sterigmatocystin biosynthesis p450 monooxygenase stcB - Aspergillus nidulans | 0.5 |
| An03g06390 | strong similarity to 3-(3-hydroxyphenyl)propionate hydroxylase MhpA - Comamonas testosteroni                   | 0.5 |
| An03g05110 | similarity to hypothetical protein BAB11562.1 - Arabidopsis thaliana                                           | 0.5 |
| An03g04840 | hypothetical protein                                                                                           | 0.5 |
| An03g04770 | similarity to hypothetical protein CAD11383.1 - Neurospora crassa                                              | 0.5 |
| An03g04690 | strong similarity to hypothetical osmosensor Sho1p - Candida utilis                                            | 0.5 |
| An03g03300 | similarity to almond N-glycosidase from patent EP676473-A2 - Prunus dulcis                                     | 0.5 |
| An03g03010 | similarity to hypothetical serine/threonine protein phosphatase topA - Fervidobacterium islandicum             | 0.5 |

|            |                                                                                                                |     |
|------------|----------------------------------------------------------------------------------------------------------------|-----|
| An03g02690 | strong similarity to hypothetical protein SCF91.02c - <i>Streptomyces coelicolor</i>                           | 0.5 |
| An03g01550 | similarity to gluconate:NADP 5-oxidoreductase GNO - <i>Gluconobacter oxydans</i><br>[truncated ORF]            | 0.5 |
| An03g01130 | strong similarity to hypothetical protein encoded by An07g06330 - <i>Aspergillus niger</i>                     | 0.5 |
| An03g00690 | hypothetical protein                                                                                           | 0.5 |
| An03g00640 | similarity to neutral amino acid permease mtr - <i>Neurospora crassa</i> [truncated ORF]                       | 0.5 |
| An02g14910 | similarity to human peptidase HPEP-14 from patent WO200042201-A2 - <i>Homo sapiens</i> [truncated orf]         | 0.5 |
| An02g13300 | similarity to hypothetical protein ID880 - <i>Bradyrhizobium japonicum</i>                                     | 0.5 |
| An02g13180 | strong similarity to beta-1,3-exoglucanase lam1.3 - <i>Trichoderma atroviride</i>                              | 0.5 |
| An02g12930 | similarity to tetracycline efflux pump tcrC - <i>Streptomyces aureofaciens</i>                                 | 0.5 |
| An02g11650 | hypothetical protein                                                                                           | 0.5 |
| An02g09810 | strong similarity to mitochondrial nicotinamide nucleotide transhydrogenase NNTM - <i>Bos taurus</i>           | 0.5 |
| An02g09090 | strong similarity to mutarotase enzyme from patent JP07039380-A - <i>Sus scrofa</i>                            | 0.5 |
| An02g08810 | hypothetical protein                                                                                           | 0.5 |
| An02g07930 | strong similarity to precursor of linoleate diol synthase - <i>Gaeumannomyces graminis</i>                     | 0.5 |
| An02g07340 | similarity to hypothetical protein CAE76294.1 - <i>Neurospora crassa</i>                                       | 0.5 |
| An02g07290 | weak similarity to hypothetical protein encoded by An11g05410 - <i>Aspergillus niger</i>                       | 0.5 |
| An02g05920 | strong similarity to GABA permease Uga4 - <i>Saccharomyces cerevisiae</i>                                      | 0.5 |
| An02g05330 | hypothetical protein                                                                                           | 0.5 |
| An02g04970 | hypothetical protein                                                                                           | 0.5 |
| An02g04910 | strong similarity to multidrug resistance ABC transporter bfr1p - <i>Schizosaccharomyces pombe</i>             | 0.5 |
| An02g04110 | similarity to phenylacetaldehyde dehydrogenase padA - <i>Escherichia coli</i>                                  | 0.5 |
| An02g03700 | weak similarity to nicotinic acetylcholine receptor alpha-4 chain ACh4 - <i>Rattus norvegicus</i>              | 0.5 |
| An02g03450 | weak similarity to hypothetical protein AAA72367.1 - <i>Homo sapiens</i>                                       | 0.5 |
| An02g02920 | strong similarity to triosephosphate isomerase tpiA - <i>Bacillus stearothermophilus</i>                       | 0.5 |
| An02g02870 | strong similarity to alcohol dehydrogenase adhIII - <i>Aspergillus nidulans</i>                                | 0.5 |
| An02g01410 | hypothetical protein                                                                                           | 0.5 |
| An01g14020 | similarity to sterigmatocystin synthesis transcription regulator aflR - <i>Aspergillus nidulans</i>            | 0.5 |
| An01g13500 | hypothetical protein                                                                                           | 0.5 |
| An01g13480 | strong similarity to protein SEQ ID NO:7805 from patent WO200253728-A2 - <i>Candida albicans</i>               | 0.5 |
| An01g10620 | hypothetical protein                                                                                           | 0.5 |
| An01g09980 | strong similarity to hemolysin Asp-HS - <i>Aspergillus fumigatus</i>                                           | 0.5 |
| An01g09460 | similarity to glucoamylase III Wsc2 - <i>Saccharomyces cerevisiae</i> [putative frameshift]                    | 0.5 |
| An01g08600 | similarity to hypothetical protein At2g26280 - <i>Arabidopsis thaliana</i>                                     | 0.5 |
| An01g06920 | strong similarity to multidrug resistance protein ABCC2 - <i>Homo sapiens</i>                                  | 0.5 |
| An01g06830 | similarity to 3-ketosphinganine reductase Tsc10 - <i>Saccharomyces cerevisiae</i>                              | 0.5 |
| An01g06120 | strong similarity to 4-alpha-glucanotransferase / amylo-1,6-glucosidase Gdb1 - <i>Saccharomyces cerevisiae</i> | 0.5 |
| An01g05960 | similarity to cyanovirin-N CV-N - <i>Nostoc ellipsosporum</i>                                                  | 0.5 |
| An01g05920 | strong similarity to hypothetical methyltransferase AAO34671.1 - <i>Gibberella zeae</i>                        | 0.5 |
| An01g04970 | strong similarity to lysosomal cystine transporter cystinosin CTNS - <i>Homo sapiens</i>                       | 0.5 |
| An01g04560 | strong similarity to mixed-linked glucanase precursor MLG1 - <i>Cochliobolus carbonum</i>                      | 0.5 |
| An01g03290 | weak similarity to hypothetical lipoprotein nlpD - <i>Synechocystis sp.</i> [truncated ORF]                    | 0.5 |
| An01g02240 | similarity to 1-aminocyclopropane-1-carboxylic acid oxidase - <i>Cucumis sativus</i>                           | 0.5 |
| An01g02110 | similarity to hypothetical protein CAD11409.1 - <i>Neurospora crassa</i>                                       | 0.5 |

|            |                                                                                                                         |     |
|------------|-------------------------------------------------------------------------------------------------------------------------|-----|
| An01g01990 | hypothetical protein                                                                                                    | 0.5 |
| An01g00680 | strong similarity to cytochrome P450 monooxygenase avnA - <i>Aspergillus parasiticus</i>                                | 0.5 |
| An01g00520 | hypothetical protein                                                                                                    | 0.5 |
| An16g04510 | strong similarity to EST an_0311 - <i>Aspergillus niger</i>                                                             | 0.5 |
| An16g02910 | strong similarity to hypothetical protein CC0533 - <i>Caulobacter crescentus</i>                                        | 0.5 |
| An16g01710 | strong similarity to L-iditol 2-dehydrogenase (sorbitol dehydrogenase) SORD - <i>Homo sapiens</i>                       | 0.5 |
| An15g00290 | strong similarity to acetamidase amdS - <i>Aspergillus nidulans</i>                                                     | 0.5 |
| An12g05550 | hypothetical protein                                                                                                    | 0.5 |
| An11g03380 | similarity to monoglyceride lipase mgll - <i>Mus musculus</i>                                                           | 0.5 |
| An08g10110 | strong similarity to lipid transfer protein POX18 - <i>Candida tropicalis</i>                                           | 0.5 |
| An08g09430 | similarity to notchless Nle - <i>Drosophila melanogaster</i>                                                            | 0.5 |
| An07g10320 | strong similarity to hypothetical conserved protein B13I18.30 - <i>Neurospora crassa</i>                                | 0.5 |
| An04g04170 | strong similarity to NAD-dependent D-arabinitol dehydrogenase ard - <i>Candida tropicalis</i>                           | 0.5 |
| An04g01600 | strong similarity to hypothetical protein B1D1.80 - <i>Neurospora crassa</i>                                            | 0.5 |
| An03g02500 | similarity to transmembrane protein from patent WO9927105-A2 - <i>Chlamydia pneumoniae</i>                              | 0.5 |
| An02g14850 | similarity to barley containing SNP protein fragment SEQ ID NO:660 from patent WO2003057877-A1 - <i>Hordeum vulgare</i> | 0.5 |
| An02g02340 | strong similarity to chitin synthase with a myosin motor-like domain csmA - <i>Aspergillus nidulans</i>                 | 0.5 |
| An01g06500 | strong similarity to filamentous growth protein Dfg5 - <i>Saccharomyces cerevisiae</i>                                  | 0.5 |
| An01g01660 | weak similarity to alkyl salicylate esterase salE - <i>Acinetobacter</i> sp.                                            | 0.5 |
