# Supplementary material for: A Transcriptome Meta-Analysis Proposes Novel Biological Roles for the Antifungal Protein AnAFP in Aspergillus niger
Source: PubMed Central journal article supplement (PMC5106034; doi:10.1371/journal.pone.0165755), 2016-11-11
Supplement: pone.0165755.s008.pdf [file pone.0165755.s008.pdf]

S3 Table

| Gene ID    | Annotation                                                                                                                    | Spearman coefficient |
|------------|-------------------------------------------------------------------------------------------------------------------------------|----------------------|
| An08g00760 | similarity to RNA helicase Prp22 - <i>Saccharomyces cerevisiae</i>                                                            | -0.75                |
| An16g02510 | strong similarity to alcohol dehydrogenase C ADHC - <i>Mycobacterium smegmatis</i>                                            | -0.65                |
| An15g01650 | similarity to tetracycline resistance protein TetH - <i>Pasteurella multocida</i>                                             | -0.65                |
| An12g08570 | similarity to type 2 peroxiredoxin PrxII - <i>Brassica napus</i>                                                              | -0.65                |
| An09g05010 | strong similarity to choline permease Hnm1 - <i>Saccharomyces cerevisiae</i>                                                  | -0.65                |
| An09g03110 | strong similarity to alpha-amylase precursor amy - <i>Bacillus amyloliquefaciens</i>                                          | -0.65                |
| An08g06370 | strong similarity to GTP-cyclohydrolase II RIB1 - <i>Pichia guilliermondii</i>                                                | -0.65                |
| An04g04970 | strong similarity to Yta11 - <i>Saccharomyces cerevisiae</i>                                                                  | -0.65                |
| An02g01730 | strong similarity to mitochondrial dicarboxylate transport protein Dtp - <i>Saccharomyces cerevisiae</i>                      | -0.65                |
| An01g11930 | strong similarity to histidinol-phosphate transaminase his3p - <i>Schizosaccharomyces pombe</i>                               | -0.65                |
| An18g06760 | strong similarity to NAD(+)-isocitrate dehydrogenase subunit I idh1 - <i>Ajellomyces capsulatus</i>                           | -0.6                 |
| An18g05880 | similarity to nucleolar protein Nulp1 - <i>Mus musculus</i>                                                                   | -0.6                 |
| An16g03130 | strong similarity to mitochondrial asparagine--tRNA ligase YCR024c - <i>Saccharomyces cerevisiae</i>                          | -0.6                 |
| An15g07500 | strong similarity to ribokinase rbsK - <i>Escherichia coli</i>                                                                | -0.6                 |
| An15g02360 | strong similarity to acetylornithine aminotransferase arg8 - <i>Kluyveromyces lactis</i>                                      | -0.6                 |
| An15g02320 | strong similarity to chaperone protein Atp11 - <i>Saccharomyces cerevisiae</i>                                                | -0.6                 |
| An14g04090 | strong similarity to hypothetical protein she9 - <i>Candida albicans</i>                                                      | -0.6                 |
| An13g01080 | strong similarity to ATP phosphoribosyltransferase his1p - <i>Schizosaccharomyces pombe</i> [putative sequencing error]       | -0.6                 |
| An12g04930 | strong similarity to hypothetical mitochondrial carrier protein SPBP23A10.06 - <i>Schizosaccharomyces pombe</i>               | -0.6                 |
| An12g03940 | strong similarity to hypothetical pyridoxine synthesis protein PDX2 - <i>Cercospora nicotianae</i>                            | -0.6                 |
| An11g02760 | strong similarity to protein involved in vesicle transport in the secretory pathway YAL048c - <i>Saccharomyces cerevisiae</i> | -0.6                 |
| An11g02650 | strong similarity to hypothetical gtpase activating protein SPAC824.09c - <i>Schizosaccharomyces pombe</i>                    | -0.6                 |
| An09g05860 | strong similarity to methylenetetrahydrofolate reductase (NADPH) Met12 - <i>Saccharomyces cerevisiae</i>                      | -0.6                 |
| An09g02530 | strong similarity to hypothetical protein EAA60542.1 - <i>Aspergillus nidulans</i>                                            | -0.6                 |
| An08g00670 | similarity to hypothetical membrane protein YGR101w - <i>Saccharomyces cerevisiae</i>                                         | -0.6                 |
| An07g09360 | strong similarity to maleylacetate reductase MacA - <i>Rhodococcus opacus</i>                                                 | -0.6                 |
| An06g01990 | weak similarity to integral membrane protein PTH11 - <i>Magnaporthe grisea</i>                                                | -0.6                 |
| An04g07060 | strong similarity to peptide ABC transporter protein Mdl1 - <i>Saccharomyces cerevisiae</i>                                   | -0.6                 |
| An04g06890 | similarity to 72-kD protein of the signal recognition particle SRP72 - <i>Canis lupus</i>                                     | -0.6                 |
| An04g00220 | strong similarity to methionine-N-acetyltransferase Nat2 - <i>Saccharomyces cerevisiae</i>                                    | -0.6                 |
| An02g08010 | similarity to hypothetical serine-rich protein SPBC215.13 - <i>Schizosaccharomyces pombe</i>                                  | -0.6                 |
| An02g07870 | similarity to prolyl-4-hydroxylase-alpha - <i>Drosophila melanogaster</i>                                                     | -0.6                 |
| An02g06860 | strong similarity to glutamate decarboxylase 1 - <i>Felis silvestris catus</i>                                                | -0.6                 |
| An02g06150 | strong similarity to branched-chain amino acid aminotransferase Bat2 - <i>Saccharomyces cerevisiae</i>                        | -0.6                 |
| An02g05180 | hypothetical protein                                                                                                          | -0.6                 |
| An02g01040 | similarity to hypothetical protein EAA71860.1 - <i>Gibberella zeae</i>                                                        | -0.6                 |
| An01g08570 | strong similarity to thioredoxin reductase TrxB - <i>Penicillium chrysogenum</i>                                              | -0.6                 |
| An08g04080 | strong similarity to mitochondrial processing peptidase alpha chain MPP - <i>Neurospora crassa</i>                            | -0.6                 |
| An18g05690 | strong similarity to hypothetical protein YDR372c - <i>Saccharomyces cerevisiae</i>                                           | -0.55                |
| An18g04400 | strong similarity to GTP-binding protein DRG - <i>Xenopus laevis</i>                                                          | -0.55                |

|            |                                                                                                                             |       |
|------------|-----------------------------------------------------------------------------------------------------------------------------|-------|
| An18g03580 | similarity to hypothetical protein SPBC543.08 - Schizosaccharomyces pombe                                                   | -0.55 |
| An18g03300 | strong similarity to cytosolic phenylalanine--tRNA ligase alpha subunit Frs1 - Saccharomyces cerevisiae                     | -0.55 |
| An17g01270 | strong similarity to mitochondrial ribosomal protein of the large subunit Mrp17 - Saccharomyces cerevisiae                  | -0.55 |
| An16g08850 | strong similarity to origin recognition complex associated protein p81 - Xenopus laevis                                     | -0.55 |
| An16g07840 | similarity to M protein emm55 - Streptococcus pyogenes                                                                      | -0.55 |
| An16g06120 | strong similarity to glycosylphosphatidylinositol-anchored beta(1-3)glucanoyltransferase gel3 - Aspergillus fumigatus       | -0.55 |
| An16g06010 | similarity to phosphoglycerate mutase pgm - Zymomonas mobilis                                                               | -0.55 |
| An16g05880 | strong similarity to neutral amino acid permease mtr - Neurospora crassa                                                    | -0.55 |
| An16g05470 | weak similarity to hypothetical RNA-binding protein - Schizosaccharomyces pombe                                             | -0.55 |
| An16g03870 | weak similarity to transcription termination factor Rho - Micrococcus luteus                                                | -0.55 |
| An16g02520 | strong similarity to threonine synthase Thr4 - Saccharomyces cerevisiae                                                     | -0.55 |
| An15g03220 | strong similarity to member of the subfamily of yeast glutaredoxins Grx4 - Saccharomyces cerevisiae                         | -0.55 |
| An15g02420 | similarity to eukaryotic translation initiation factor eIF2B subunit 3 - Homo sapiens                                       | -0.55 |
| An15g01020 | strong similarity to cardiolipin synthase Crd1 - Saccharomyces cerevisiae                                                   | -0.55 |
| An15g00930 | strong similarity to chaperone for ubiquinol-cytochrome c reductase Abc1 - Saccharomyces cerevisiae                         | -0.55 |
| An15g00550 | strong similarity to hypothetical protein YBR101c - Saccharomyces cerevisiae                                                | -0.55 |
| An15g00420 | strong similarity to mitochondrial leucine--tRNA ligase leu-5 - Neurospora crassa                                           | -0.55 |
| An14g07200 | strong similarity to catalase C catC - Aspergillus nidulans                                                                 | -0.55 |
| An14g07130 | strong similarity to neutral amino acid permease mtr - Neurospora crassa                                                    | -0.55 |
| An14g05750 | strong similarity to 12-oxo-phytodienoate reductase OPR3 - Arabidopsis thaliana                                             | -0.55 |
| An14g05000 | strong similarity to protein Ria1 - Saccharomyces cerevisiae                                                                | -0.55 |
| An14g03330 | similarity to hypothetical protein SCF12.05 - Streptomyces coelicolor                                                       | -0.55 |
| An14g00550 | strong similarity to hypothetical protein YBL036c - Saccharomyces cerevisiae                                                | -0.55 |
| An14g00310 | strong similarity to beta-succinyl CoA synthase precursor scsB - Neocallimastix frontalis                                   | -0.55 |
| An13g03510 | hypothetical protein                                                                                                        | -0.55 |
| An13g01000 | weak similarity to death associated protein DAP3 from patent WO9839429-A2 - Homo sapiens                                    | -0.55 |
| An13g00440 | strong similarity to uridine-monophosphate kinase Ura6 - Saccharomyces cerevisiae                                           | -0.55 |
| An12g07580 | strong similarity to acetylglutamate kinase/N-acetyl-gamma-glutamyl-phosphate reductase precursor arg-6 - Neurospora crassa | -0.55 |
| An12g04750 | strong similarity to prohibitin Phb2 - Saccharomyces cerevisiae                                                             | -0.55 |
| An12g04660 | strong similarity to thiamin-phosphate pyrophosphorylase/hydroxyethylthiazole kinase Thi6 - Saccharomyces cerevisiae        | -0.55 |
| An12g02520 | strong similarity to clavulanic acid dehydrogenase from patent WO9503416-A - Streptomyces clavuligerus                      | -0.55 |
| An12g00130 | strong similarity to mRNA processing protein of cytochrome c oxidase Mss51 - Saccharomyces cerevisiae                       | -0.55 |
| An11g09510 | strong similarity to aspartate-semialdehyde dehydrogenase Hom2 - Saccharomyces cerevisiae                                   | -0.55 |
| An11g06790 | weak similarity to DEAH-box RNA helicase Mut6 - Chlamydomonas reinhardtii                                                   | -0.55 |
| An11g04520 | strong similarity to hypothetical protein B23111.70 - Neurospora crassa                                                     | -0.55 |
| An11g03730 | weak similarity to integral membrane protein PTH11 from patent WO9913094-A2 - Magnaporthe grisea                            | -0.55 |
| An11g00090 | similarity to hypothetical membrane protein pth - Blumeria graminis                                                         | -0.55 |
| An10g00360 | strong similarity to nuclear pore-associated DEAD-box protein Dbp5 - Saccharomyces cerevisiae                               | -0.55 |
| An09g03500 | benzoate 4-monooxygenase cytochrome P450 53 bphA - Aspergillus niger                                                        | -0.55 |
| An09g03030 | strong similarity to glutathione synthase Gsh2 - Saccharomyces cerevisiae [putative sequencing error]                       | -0.55 |

|            |                                                                                                                              |       |
|------------|------------------------------------------------------------------------------------------------------------------------------|-------|
| An08g10340 | strong similarity to 3,4-dihydroxy-2-butanone 4-phosphate synthase Rib3 - <i>Saccharomyces cerevisiae</i>                    | -0.55 |
| An08g06080 | anthranilate synthase multifunctional protein trpC - <i>Aspergillus niger</i>                                                | -0.55 |
| An08g02800 | strong similarity to nuclear WD protein PRL1 - <i>Arabidopsis thaliana</i>                                                   | -0.55 |
| An07g09550 | strong similarity to mitochondrial ribosomal protein Nam9 - <i>Saccharomyces cerevisiae</i>                                  | -0.55 |
| An07g09120 | strong similarity to precursor of methionyl aminopeptidase Map1 - <i>Saccharomyces cerevisiae</i>                            | -0.55 |
| An07g07420 | strong similarity to splicing factor PRP8 - <i>Homo sapiens</i>                                                              | -0.55 |
| An07g07300 | strong similarity to prostaglandin f(2alpha) synthase TbPGFS - <i>Trypanosoma brucei</i>                                     | -0.55 |
| An07g05620 | strong similarity to transcription elongation factor Rtf1 - <i>Saccharomyces cerevisiae</i>                                  | -0.55 |
| An07g05510 | strong similarity to ferric reductase Fre2 - <i>Saccharomyces cerevisiae</i>                                                 | -0.55 |
| An07g02770 | strong similarity to hypothetical protein YKL195w - <i>Saccharomyces cerevisiae</i>                                          | -0.55 |
| An07g01580 | strong similarity to nuclear import protein Mtr10 - <i>Saccharomyces cerevisiae</i>                                          | -0.55 |
| An05g01290 | strong similarity to hexose transporter Hxt3 - <i>Saccharomyces cerevisiae</i>                                               | -0.55 |
| An04g07120 | similarity to protein FRM2 involved in fatty acid regulation - <i>Saccharomyces cerevisiae</i>                               | -0.55 |
| An04g07080 | similarity to hypothetical protein SPBC2G5.01 - <i>Schizosaccharomyces pombe</i>                                             | -0.55 |
| An04g06490 | strong similarity to 3,4-dihydroxy-5-hexaprenylbenzoate methyltransferase - <i>Rattus norvegicus</i>                         | -0.55 |
| An04g05650 | strong similarity to hypothetical protein SPBC1709.13c - <i>Schizosaccharomyces pombe</i>                                    | -0.55 |
| An04g03060 | strong similarity to mitochondrial tyrosine--tRNA ligase CYT-18 - <i>Neurospora crassa</i>                                   | -0.55 |
| An04g02690 | strong similarity to alcohol dehydrogenase ADH from patent EP0845532-A - Unclassified organism                               | -0.55 |
| An04g02580 | strong similarity to threonine deaminase ILV - <i>Arxula adenivorans</i>                                                     | -0.55 |
| An04g02460 | strong similarity to heart muscle protein mitofilin HMP - <i>Homo sapiens</i>                                                | -0.55 |
| An04g02320 | strong similarity to metalloprotease 1 MP1 - <i>Homo sapiens</i>                                                             | -0.55 |
| An04g01460 | strong similarity to acyl-CoA thioesterase act48.1 - <i>Mus musculus</i>                                                     | -0.55 |
| An04g01340 | strong similarity to asparagine synthase Asn1 - <i>Saccharomyces cerevisiae</i>                                              | -0.55 |
| An04g01160 | strong similarity to hypothetical ABC transporter SPBC15C4.02 - <i>Schizosaccharomyces pombe</i>                             | -0.55 |
| An03g03640 | strong similarity to mitochondrial sulfide dehydrogenase (coenzyme Q2) SPBC2G5.06c - <i>Schizosaccharomyces pombe</i>        | -0.55 |
| An03g03530 | similarity to protein fragment SEQ ID NO:9681 from patent EP1033405-A2 - <i>Arabidopsis thaliana</i>                         | -0.55 |
| An03g03500 | strong similarity to hypothetical protein CAD36989.1 - <i>Neurospora crassa</i>                                              | -0.55 |
| An03g03470 | similarity to deoxyribodipyrimidine photolyase phrA - <i>Escherichia coli</i>                                                | -0.55 |
| An03g03000 | similarity to molybdopterin-converting factor activator chlN - <i>Escherichia coli</i>                                       | -0.55 |
| An03g01310 | strong similarity to CTP synthase Ura7 - <i>Saccharomyces cerevisiae</i>                                                     | -0.55 |
| An02g12420 | strong similarity to trifunctional C1-tetrahydrofolate synthase Ade3 - <i>Saccharomyces cerevisiae</i> [putative frameshift] | -0.55 |
| An02g11970 | strong similarity to 4-nitrophenylphosphatase pho13p - <i>Schizosaccharomyces pombe</i>                                      | -0.55 |
| An02g11800 | strong similarity to hypothetical membrane protein YPR125w - <i>Saccharomyces cerevisiae</i>                                 | -0.55 |
| An02g07880 | strong similarity to quinate transport protein qutD - <i>Aspergillus nidulans</i>                                            | -0.55 |
| An02g06850 | similarity to hypothetical membrane protein YLR077w - <i>Saccharomyces cerevisiae</i>                                        | -0.55 |
| An02g04880 | strong similarity to arginine--tRNA ligase Msr1 - <i>Saccharomyces cerevisiae</i>                                            | -0.55 |
| An02g02380 | strong similarity to hypothetical suppressor of deletion of TFIIS Ssm1 - <i>Saccharomyces cerevisiae</i>                     | -0.55 |
| An02g01540 | strong similarity to ferredoxin-NADP+ reductase FNR - <i>Homo sapiens</i>                                                    | -0.55 |
| An01g13920 | strong similarity to adenylosuccinate synthase ade2p - <i>Schizosaccharomyces pombe</i>                                      | -0.55 |
| An01g13830 | strong similarity to GTP-binding protein cgtA - <i>Caulobacter crescentus</i>                                                | -0.55 |

|            |                                                                                                                            |       |
|------------|----------------------------------------------------------------------------------------------------------------------------|-------|
| An01g10990 | strong similarity to mitochondrial threonine--tRNA ligase Mst1 - <i>Saccharomyces cerevisiae</i>                           | -0.55 |
| An01g06110 | strong similarity to glycerol-3-phosphate dehydrogenase (NAD+) precursor Gpd1 - <i>Saccharomyces cerevisiae</i>            | -0.55 |
| An01g05400 | weak similarity to hypothetical protein 6R55.1 - <i>Caenorhabditis elegans</i>                                             | -0.55 |
| An01g00550 | strong similarity to allergen rAsp f 4 - <i>Aspergillus fumigatus</i>                                                      | -0.55 |
| An18g04570 | strong similarity to cleavage/polyadenylation factor IA subunit Clp1 - <i>Saccharomyces cerevisiae</i>                     | -0.55 |
| An16g08840 | strong similarity to hypothetical protein CAE76483.1 - <i>Neurospora crassa</i>                                            | -0.55 |
| An14g04260 | strong similarity to hypothetical protein PA4181 - <i>Pseudomonas aeruginosa</i>                                           | -0.55 |
| An14g00220 | strong similarity to hypothetical protein SPAC17C9.06 - <i>Schizosaccharomyces pombe</i>                                   | -0.55 |
| An12g09280 | similarity to hypothetical protein encoded by An01g02930 - <i>Aspergillus niger</i>                                        | -0.55 |
| An04g03120 | strong similarity to assembly factor of cytochrome c oxidase Cox10 - <i>Saccharomyces cerevisiae</i>                       | -0.55 |
| An02g05640 | strong similarity to hypothetical protein SPAC11D3.03c - <i>Schizosaccharomyces pombe</i>                                  | -0.55 |
| An02g03760 | strong similarity to precursor of endopeptidase La-like enzyme Pim1 - <i>Saccharomyces cerevisiae</i>                      | -0.55 |
| An01g08830 | similarity to hypothetical protein CAD70783.1 - <i>Neurospora crassa</i>                                                   | -0.55 |
| An01g03110 | similarity to ribosomal protein of the small subunit Rsm7 - <i>Saccharomyces cerevisiae</i>                                | -0.55 |
| An18g06260 | similarity to eukaryotic translation initiation factor eIF3 subunit p35 - <i>Homo sapiens</i>                              | -0.5  |
| An18g06010 | similarity to ribosomal protein of the large subunit Yml40 - <i>Saccharomyces cerevisiae</i>                               | -0.5  |
| An18g05740 | similarity to ARF binding protein GGA2 - <i>Homo sapiens</i>                                                               | -0.5  |
| An18g05120 | strong similarity to subunit of succinyl-CoA:benzylsuccinate CoA-transferase bbsF - <i>Thaueria aromatica</i>              | -0.5  |
| An18g04650 | strong similarity to guanine nucleotide exchange factor eIF-2B 34 kDa alpha subunit Gcn3 - <i>Saccharomyces cerevisiae</i> | -0.5  |
| An18g03770 | strong similarity to ATPase Mot1 - <i>Saccharomyces cerevisiae</i>                                                         | -0.5  |
| An18g03120 | strong similarity to ATP dependent RNA helicase and pre-mRNA splicing factor Prp43 - <i>Saccharomyces cerevisiae</i>       | -0.5  |
| An18g03060 | similarity to leucine carboxyl methyltransferase LCMT - <i>Homo sapiens</i>                                                | -0.5  |
| An18g02970 | strong similarity to hydroxymethylbilane synthase Hem3 - <i>Saccharomyces cerevisiae</i>                                   | -0.5  |
| An18g02850 | strong similarity to mtRNA splice defect-suppressing mitochondrial carrier Mrs3 - <i>Saccharomyces cerevisiae</i>          | -0.5  |
| An18g02350 | strong similarity to protein phosphatase X PPX - <i>Homo sapiens</i>                                                       | -0.5  |
| An18g02140 | strong similarity to spi1-GTPase binding protein sbp1p - <i>Schizosaccharomyces pombe</i>                                  | -0.5  |
| An18g01970 | strong similarity to pantoate--beta-alanine ligase panC - <i>Corynebacterium glutamicum</i>                                | -0.5  |
| An18g01610 | strong similarity to RNA polymerase II suppressor protein Srb4 - <i>Saccharomyces cerevisiae</i>                           | -0.5  |
| An18g01400 | strong similarity to monocarboxylate transporter 3 MCT3 - <i>Rattus norvegicus</i>                                         | -0.5  |
| An17g01950 |                                                                                                                            | -0.5  |
| An17g01890 |                                                                                                                            | -0.5  |
| An17g01080 | weak similarity to member of the trichothecene gene cluster TRI7 - <i>Fusarium sporotrichioides</i>                        | -0.5  |
| An17g00890 | strong similarity to phosphoprotein phosphatase PPT - <i>Rattus norvegicus</i>                                             | -0.5  |
| An17g00880 | strong similarity to endometrium tumour EST encoded protein 137 from patent DE19817948-A1 - <i>Homo sapiens</i>            | -0.5  |
| An17g00210 | strong similarity to hypothetical oxidoreductase CAB46711.1 - <i>Schizosaccharomyces pombe</i>                             | -0.5  |
| An16g08390 | similarity to sequence 4 from patent WO0063399 - <i>Aureobasidium pullulans</i>                                            | -0.5  |
| An16g08380 | strong similarity to U4/U6 snRNP 52kD protein Prp4 - <i>Saccharomyces cerevisiae</i>                                       | -0.5  |

|            |                                                                                                                        |      |
|------------|------------------------------------------------------------------------------------------------------------------------|------|
| An16g08020 | strong similarity to valine--tRNA ligase cyt-20 - <i>Neurospora crassa</i> [putative frameshift]                       | -0.5 |
| An16g07400 | strong similarity to NAD-dependent 5,10-methylenetetrahydrofolate dehydrogenase Mtd1 - <i>Saccharomyces cerevisiae</i> | -0.5 |
| An16g05430 | strong similarity to hypothetical protein EAA58013.1 - <i>Aspergillus nidulans</i>                                     | -0.5 |
| An16g05090 | strong similarity to endonuclease Scel 75 kDa subunit Ens1 - <i>Saccharomyces cerevisiae</i>                           | -0.5 |
| An16g03950 | strong similarity to amadoriase II - <i>Aspergillus fumigatus</i>                                                      | -0.5 |
| An16g03590 | strong similarity to phosphatidylinositol-phosphatidylcholine transfer protein Sec14 - <i>Saccharomyces cerevisiae</i> | -0.5 |
| An16g03100 | strong similarity to TCP-1-containing cytosolic chaperonin zeta subunit CctZ - <i>Mus musculus</i>                     | -0.5 |
| An16g02470 | strong similarity to FAD-linked sulfhydryl oxidase Erv1 - <i>Saccharomyces cerevisiae</i>                              | -0.5 |
| An16g02200 | similarity to hypothetical protein YBR246w - <i>Saccharomyces cerevisiae</i>                                           | -0.5 |
| An16g01560 | strong similarity to protein Gcd10 - <i>Saccharomyces cerevisiae</i>                                                   | -0.5 |
| An15g06360 | similarity to multifunctional glutamine-proline--tRNA ligase Aats-glupro - <i>Drosophila melanogaster</i>              | -0.5 |
| An15g03670 | similarity to hypothetical C2H2-type zinc-finger protein - <i>Schizosaccharomyces pombe</i>                            | -0.5 |
| An15g03200 | strong similarity to mitochondrial uncoupling protein MUP1 from patent WO200061614-A2 - <i>Homo sapiens</i>            | -0.5 |
| An15g02660 | strong similarity to essential protein SEQ ID NO:22 from patent WO2003076464-A2 - <i>Aspergillus fumigatus</i>         | -0.5 |
| An15g01290 | strong similarity to protein D123 - <i>Homo sapiens</i>                                                                | -0.5 |
| An15g00890 | strong similarity to hypothetical regulator protein Rms1 - <i>Saccharomyces cerevisiae</i>                             | -0.5 |
| An15g00770 | strong similarity to mitochondrial ribosomal protein of the small subunit S9 - <i>Saccharomyces cerevisiae</i>         | -0.5 |
| An15g00190 | strong similarity to mitochondrial import receptor MOM38 - <i>Neurospora crassa</i>                                    | -0.5 |
| An14g06980 | strong similarity to delta-12 fatty acid desaturase - <i>Mortierella alpina</i>                                        | -0.5 |
| An14g06780 | strong similarity to heat-shock protein Hsp40 - <i>Homo sapiens</i>                                                    | -0.5 |
| An14g06550 | strong similarity to hypothetical membrane protein YNL011c - <i>Saccharomyces cerevisiae</i>                           | -0.5 |
| An14g06320 | strong similarity to mitochondrial protease Imp1 - <i>Saccharomyces cerevisiae</i>                                     | -0.5 |
| An14g06310 | strong similarity to mitochondrial ribosomal protein of the large subunit Yml35 - <i>Saccharomyces cerevisiae</i>      | -0.5 |
| An14g06290 | strong similarity to 3-hydroxyisobutyryl-coenzyme A hydrolase from patent WO9851782-A2 - <i>Homo sapiens</i>           | -0.5 |
| An14g06190 | similarity to translation initiation factor eIF2B 71 kDa delta subunit Gcd2 - <i>Saccharomyces cerevisiae</i>          | -0.5 |
| An14g04980 | strong similarity to splicing protein Prp19 - <i>Saccharomyces cerevisiae</i>                                          | -0.5 |
| An14g04790 | strong similarity to peptidyl-prolyl cis-trans isomerase SPAC21E11.05C - <i>Schizosaccharomyces pombe</i>              | -0.5 |
| An14g04740 | weak similarity to hypothetical protein SPBC18H10.17c - <i>Schizosaccharomyces pombe</i>                               | -0.5 |
| An14g03780 | strong similarity to mitochondrial RNA helicase Suv3 - <i>Saccharomyces cerevisiae</i>                                 | -0.5 |
| An14g03740 | strong similarity to hypothetical protein SPCC14G10.02 - <i>Schizosaccharomyces pombe</i>                              | -0.5 |
| An14g03030 | similarity to spermidine/spermine N(1)-acetyltransferase SAT - <i>Homo sapiens</i> [putative frameshift]               | -0.5 |
| An14g01560 | strong similarity to zootin Zuo1 - <i>Saccharomyces cerevisiae</i>                                                     | -0.5 |
| An14g01030 | strong similarity to translation initiation factor eIF-3 subunit - <i>Homo sapiens</i> [truncated ORF]                 | -0.5 |
| An14g00630 | strong similarity to salt tolerance protein Met22 - <i>Saccharomyces cerevisiae</i>                                    | -0.5 |
| An13g02710 | weak similarity to hypothetical protein YIL064w - <i>Saccharomyces cerevisiae</i>                                      | -0.5 |
| An13g01530 | weak similarity to hypothetical protein ycnE - <i>Bacillus subtilis</i>                                                | -0.5 |

|            |                                                                                                          |      |
|------------|----------------------------------------------------------------------------------------------------------|------|
| An13g00600 | weak similarity to hypothetical protein Rv3439c - Mycobacterium tuberculosis [truncated ORF]             | -0.5 |
| An12g07950 | strong similarity to mitochondrial RNA splicing protein Mrs2 - Saccharomyces cerevisiae                  | -0.5 |
| An12g07870 | strong similarity to cytosolic aspartate transaminase Aat2 - Saccharomyces cerevisiae                    | -0.5 |
| An12g07100 | strong similarity to cucumopine synthase cus - Agrobacterium rhizogenes                                  | -0.5 |
| An12g05510 | strong similarity to triacetylfusarinine C transporter Taf1 - Saccharomyces cerevisiae                   | -0.5 |
| An12g03850 | similarity to DEAD box RNA helicase CHR1 - Candida albicans [putative frameshift]                        | -0.5 |
| An12g00760 | strong similarity to hypothetical nicotinate phosphoribosyltransferase Npt1 - Saccharomyces cerevisiae   | -0.5 |
| An11g10470 | strong similarity to glutaryl-CoA dehydrogenase GCHD - Homo sapiens                                      | -0.5 |
| An11g10370 | strong similarity to trans-pentaprenyltransferase Coq1 - Saccharomyces cerevisiae                        | -0.5 |
| An11g10140 | strong similarity to NADH:ubiquinone reductase intermediate-associated protein CIA30 - Neurospora crassa | -0.5 |
| An11g10070 | weak similarity to hypothetical protein SPAC13G7.11 - Schizosaccharomyces pombe                          | -0.5 |
| An11g09830 | weak similarity to hypothetical protein B0280.2 - Caenorhabditis elegans                                 | -0.5 |
| An11g09790 | strong similarity to sulfate adenylyltransferase sC - Aspergillus nidulans                               | -0.5 |
| An11g07970 | strong similarity to hypothetical protein SPBC16H5.12c - Schizosaccharomyces pombe                       | -0.5 |
| An11g07650 | strong similarity to antioxidant protein AOP2 - Mus musculus                                             | -0.5 |
| An11g06810 | strong similarity to mitochondrial ribosomal protein of the large subunit L6 - Saccharomyces cerevisiae  | -0.5 |
| An11g06230 | similarity to oxidoreductase from patent WO0100844 - Corynebacterium glutamicum                          | -0.5 |
| An11g05840 | strong similarity to hypothetical short chain dehydrogenase L3377.10 - Leishmania major                  | -0.5 |
| An11g05810 | similarity to 2,4-dihydroxyacetophenone dioxygenase dad - Alcaligenes sp.                                | -0.5 |
| An11g04850 | hypothetical protein                                                                                     | -0.5 |
| An11g03170 | similarity to hypothetical phosphoglycerate mutase SPAC5H10.03 - Schizosaccharomyces pombe               | -0.5 |
| An11g02830 | similarity to resistance to o-dinitrobenzene protein Rod1 - Saccharomyces cerevisiae [truncated ORF]     | -0.5 |
| An11g02670 | strong similarity to hypothetical protein SPBC1703.02 - Schizosaccharomyces pombe                        | -0.5 |
| An11g02400 | strong similarity to cytosolic lysine--tRNA ligase Krs1 - Saccharomyces cerevisiae                       | -0.5 |
| An11g02360 | strong similarity to T-complex protein 1 epsilon subunit CCT5 - Homo sapiens                             | -0.5 |
| An11g02030 | similarity to hypothetical protein T23E23.20 - Arabidopsis thaliana                                      | -0.5 |
| An11g01580 | similarity to protoporphyrinogen oxidase PPO - Mus musculus                                              | -0.5 |
| An11g00770 | strong similarity to SUMO-1 activating enzyme subunit 2 SAE2 - Homo sapiens                              | -0.5 |
| An11g00480 | strong similarity to spindle assembly checkpoint protein sldA - Aspergillus nidulans                     | -0.5 |
| An09g06680 | citrate synthase citA - Aspergillus niger                                                                | -0.5 |
| An09g06580 | strong similarity to ras-GTPase-activating protein SH3-domain binding protein G3BP - Mus musculus        | -0.5 |
| An09g06070 | strong similarity to subunit of transcription initiation factor TFIID p80 - Xenopus laevis               | -0.5 |
| An09g05980 | similarity to ribosomal protein of the large subunit L1 rplA - Escherichia coli                          | -0.5 |
| An09g05970 | strong similarity to cytosolic glutamate--tRNA ligase - Arabidopsis thaliana                             | -0.5 |
| An09g05840 | strong similarity to thymidylate kinase CDC8 - Homo sapiens                                              | -0.5 |
| An09g05100 | similarity to Impact - Mus musculus                                                                      | -0.5 |
| An09g03950 | strong similarity to cytosolic tryptophan--tRNA ligase Wrs1 - Saccharomyces cerevisiae                   | -0.5 |
| An08g10610 | strong similarity to hypothetical protein EAA59931.1 - Aspergillus nidulans                              | -0.5 |

|            |                                                                                                                                                   |      |
|------------|---------------------------------------------------------------------------------------------------------------------------------------------------|------|
| An08g10500 | strong similarity to hypothetical protein EAA62682.1 - <i>Aspergillus nidulans</i>                                                                | -0.5 |
| An08g07000 | similarity to hypothetical protein CAF32094.1/AfA19D12.030 - <i>Aspergillus fumigatus</i>                                                         | -0.5 |
| An08g06180 | similarity to 6-hydroxy-D-nicotine oxidase 6-HDNO - <i>Arthrobacter oxidans</i>                                                                   | -0.5 |
| An08g05580 | strong similarity to precursor of isocitrate dehydrogenase (NAD+) chain Idh2 - <i>Saccharomyces cerevisiae</i>                                    | -0.5 |
| An08g05500 | strong similarity to mitochondrial ribosomal protein of the large subunit Yml3 - <i>Saccharomyces cerevisiae</i>                                  | -0.5 |
| An08g05060 | strong similarity to hypothetical protein encoded by AfA14E5.29 - <i>Aspergillus fumigatus</i>                                                    | -0.5 |
| An08g04670 | strong similarity to hypothetical sugar transporter encoded by DRA0271 - <i>Deinococcus radiodurans</i>                                           | -0.5 |
| An08g04260 | similarity to hypothetical protein YNL191w - <i>Saccharomyces cerevisiae</i>                                                                      | -0.5 |
| An08g04240 | strong similarity to alternative NADH:ubiquinone reductase NDH2 - <i>Yarrowia lipolytica</i>                                                      | -0.5 |
| An08g03920 | strong similarity to hypothetical protein CAE47894.1 - <i>Aspergillus fumigatus</i>                                                               | -0.5 |
| An08g02990 | strong similarity to adenylylsulfate kinase Met14 - <i>Saccharomyces cerevisiae</i>                                                               | -0.5 |
| An08g01920 | similarity to acetate regulatory DNA binding protein facB - <i>Aspergillus nidulans</i>                                                           | -0.5 |
| An08g01790 | strong similarity to eukaryotic initiation factor 3H1 subunit TIF3H1 - <i>Arabidopsis thaliana</i>                                                | -0.5 |
| An08g01740 | strong similarity to uronate dehydrogenase from patent DE19604798-A1 - <i>Saccharomyces cerevisiae</i>                                            | -0.5 |
| An08g01650 | similarity to mitochondrial import protein Mpi1 - <i>Saccharomyces cerevisiae</i>                                                                 | -0.5 |
| An08g00980 | strong similarity to translation initiation factor eIF2B guanine nucleotide exchange factor 43 kDa subunit Gcd7 - <i>Saccharomyces cerevisiae</i> | -0.5 |
| An08g00730 | similarity to transitional endoplasmic reticulum ATPase - <i>Rattus norvegicus</i>                                                                | -0.5 |
| An08g00500 | similarity to hypothetical protein CAD70990.1 - <i>Neurospora crassa</i>                                                                          | -0.5 |
| An07g10040 | strong similarity to coproporphyrinogen oxidase III Hem13 - <i>Saccharomyces cerevisiae</i>                                                       | -0.5 |
| An07g10010 | strong similarity to mitochondrial carrier protein Yhm1 - <i>Saccharomyces cerevisiae</i>                                                         | -0.5 |
| An07g09340 | similarity to hypothetical protein YPR169w - <i>Saccharomyces cerevisiae</i>                                                                      | -0.5 |
| An07g09110 | similarity to monooxygenase VioC - <i>Chromobacterium violaceum</i>                                                                               | -0.5 |
| An07g08430 | strong similarity to mitochondrial preprotein import complex subunit metaxin MTX - <i>Homo sapiens</i> [truncated ORF]                            | -0.5 |
| An07g07880 | similarity to ORFX ORF2689 polypeptide sequence SEQ ID NO:5378 from patent WO200058473-A2 - <i>Homo sapiens</i>                                   | -0.5 |
| An07g07000 | strong similarity to mitochondrial m-AAA protease subunit Yta12 - <i>Saccharomyces cerevisiae</i>                                                 | -0.5 |
| An07g06630 | hypothetical protein                                                                                                                              | -0.5 |
| An07g06000 | strong similarity to cytosolic aspartate--tRNA ligase Dps1 - <i>Saccharomyces cerevisiae</i>                                                      | -0.5 |
| An07g05290 | similarity to hypothetical mitochondrial ribosomal protein - <i>Schizosaccharomyces pombe</i>                                                     | -0.5 |
| An07g03940 | strong similarity to zinc-finger transcription factor amdA - <i>Aspergillus nidulans</i>                                                          | -0.5 |
| An07g03150 | strong similarity to nuclear tRNA export receptor exportin-t - <i>Homo sapiens</i>                                                                | -0.5 |
| An07g03080 | hypothetical protein                                                                                                                              | -0.5 |
| An06g01820 | similarity to hypothetical ribosomal protein B13I18.70 - <i>Neurospora crassa</i>                                                                 | -0.5 |
| An06g01780 | strong similarity to (beta)-transducin like protein TBL1 - <i>Homo sapiens</i>                                                                    | -0.5 |
| An06g01540 | strong similarity to serine C-palmitoyltransferase chain Lcb1 - <i>Saccharomyces cerevisiae</i>                                                   | -0.5 |
| An06g01520 | similarity to hypothetical protein SPBC24C6.10c - <i>Schizosaccharomyces pombe</i>                                                                | -0.5 |
| An06g00280 | strong similarity to hypothetical protein YBR096w - <i>Saccharomyces cerevisiae</i>                                                               | -0.5 |
| An05g00220 | strong similarity to L-ornithine N5-hydroxylase psbA - <i>Pseudomonas</i> sp.                                                                     | -0.5 |
| An04g08210 | strong similarity to pyruvate water dikinase ppsA - <i>Escherichia coli</i> [putative sequencing error]                                           | -0.5 |
| An04g06210 | strong similarity to homocitrate synthase lys1 - <i>Penicillium chrysogenum</i>                                                                   | -0.5 |
| An04g05420 | strong similarity to alpha-aminoadipate reductase large subunit lys2 - <i>Penicillium chrysogenum</i>                                             | -0.5 |

|            |                                                                                                                                |      |
|------------|--------------------------------------------------------------------------------------------------------------------------------|------|
| An04g03110 | strong similarity to mitochondrial aspartate--tRNA ligase Msd1 - <i>Saccharomyces cerevisiae</i>                               | -0.5 |
| An04g02270 | strong similarity to hypothetical protein SPAC577.03c - <i>Schizosaccharomyces pombe</i>                                       | -0.5 |
| An04g02230 | strong similarity to mitochondrial methionine--tRNA ligase MetRS - <i>Candida albicans</i>                                     | -0.5 |
| An04g01940 | strong similarity to translation initiation factor eIF2 gamma chain Gcd11 - <i>Saccharomyces cerevisiae</i>                    | -0.5 |
| An04g01650 | strong similarity to hypothetical protein B23I11.250 - <i>Neurospora crassa</i>                                                | -0.5 |
| An04g01620 | similarity to transcription factor ZFM1 - <i>Homo sapiens</i>                                                                  | -0.5 |
| An04g00490 | strong similarity to regulator subunit of the casein kinase II Ckb1 - <i>Saccharomyces cerevisiae</i>                          | -0.5 |
| An04g00390 | strong similarity to chromatin-remodeling complex protein Sfh1 - <i>Saccharomyces cerevisiae</i>                               | -0.5 |
| An04g00210 | strong similarity to ribosomal protein of the large subunit Yml9 - <i>Saccharomyces cerevisiae</i>                             | -0.5 |
| An04g00200 | strong similarity to hypothetical membrane protein YIL157c - <i>Saccharomyces cerevisiae</i>                                   | -0.5 |
| An03g05170 | similarity to sterol regulatory element binding protein-1 srebp-1 - <i>Homo sapiens</i>                                        | -0.5 |
| An03g05080 | similarity to hypothetical protein YKL069w - <i>Saccharomyces cerevisiae</i>                                                   | -0.5 |
| An03g04790 | strong similarity to mitochondrial outer membrane protein Tom70 - <i>Podospora anserina</i>                                    | -0.5 |
| An03g04660 | weak similarity to hypothetical protein YGR165w - <i>Saccharomyces cerevisiae</i>                                              | -0.5 |
| An03g04330 | strong similarity to glutamate N-acetyltransferase Arg7 - <i>Saccharomyces cerevisiae</i>                                      | -0.5 |
| An03g04280 | strong similarity to pyridoxine synthesis component pyroA - <i>Aspergillus nidulans</i>                                        | -0.5 |
| An03g03710 | strong similarity to quinate 5-dehydrogenase qutB - <i>Aspergillus nidulans</i>                                                | -0.5 |
| An03g03660 | strong similarity to glutathione reductase Glr1 - <i>Saccharomyces cerevisiae</i>                                              | -0.5 |
| An03g03460 | strong similarity to L-galactonolactone oxidase Alo - <i>Saccharomyces cerevisiae</i>                                          | -0.5 |
| An03g02810 | hypothetical protein                                                                                                           | -0.5 |
| An03g02620 | strong similarity to protein fragment SEQ ID NO:34719 from patent EP1033405-A2 - <i>Arabidopsis thaliana</i>                   | -0.5 |
| An02g14750 | strong similarity to actin-related protein - <i>Homo sapiens</i>                                                               | -0.5 |
| An02g14240 | strong similarity to mRNA guanylyltransferase - <i>Saccharomyces cerevisiae</i>                                                | -0.5 |
| An02g14080 | strong similarity to asparagine--tRNA ligase ASNS - <i>Thermus aquaticus</i>                                                   | -0.5 |
| An02g13360 | strong similarity to assembly factor of cytochrome c oxidase Sco1 - <i>Saccharomyces cerevisiae</i>                            | -0.5 |
| An02g12920 | strong similarity to hypothetical protein SPAC10F6.14c - <i>Schizosaccharomyces pombe</i>                                      | -0.5 |
| An02g12870 | hypothetical protein                                                                                                           | -0.5 |
| An02g12750 | strong similarity to cytoskeleton specific chaperonin subunit Cct4 - <i>Saccharomyces cerevisiae</i>                           | -0.5 |
| An02g12620 | strong similarity to copper metallochaperone Cox17 - <i>Saccharomyces cerevisiae</i><br>[putative sequencing error]            | -0.5 |
| An02g12610 | strong similarity to Ran-GTPase-activating protein 1 rna1p - <i>Schizosaccharomyces pombe</i>                                  | -0.5 |
| An02g12320 | strong similarity to translation initiation factor eIF-2 beta chain Sui3 - <i>Saccharomyces cerevisiae</i>                     | -0.5 |
| An02g11570 | similarity to mitochondrial ribosomal protein of the large subunit Yml49 - <i>Saccharomyces cerevisiae</i>                     | -0.5 |
| An02g11300 | similarity to mitochondrial ribosomal protein of the large subunit Yml37 - <i>Saccharomyces cerevisiae</i>                     | -0.5 |
| An02g10670 | strong similarity to protein D-lactate dehydrogenase YEL071w - <i>Saccharomyces cerevisiae</i>                                 | -0.5 |
| An02g10450 | strong similarity to GTP-binding protein Vps1 - <i>Saccharomyces cerevisiae</i>                                                | -0.5 |
| An02g10390 | strong similarity to eukaryotic translation initiation factor eIF-4A II - <i>Mus musculus</i>                                  | -0.5 |
| An02g09470 | strong similarity to hypothetical Ca <sup>2+</sup> -transporting ATPase Spf1 - <i>Saccharomyces cerevisiae</i> [truncated ORF] | -0.5 |



|            |                                                                                                                         |      |
|------------|-------------------------------------------------------------------------------------------------------------------------|------|
| An02g09370 | similarity to translation initiation factor eIF-2 alpha chain EIF2A - Homo sapiens [truncated ORF]                      | -0.5 |
| An02g09190 | strong similarity to mitochondrial ribosomal protein of the small subunit S15 - Saccharomyces cerevisiae                | -0.5 |
| An02g08920 | strong similarity to TCP1-related protein Cct3 - Saccharomyces cerevisiae                                               | -0.5 |
| An02g08820 | strong similarity to hypothetical protein SPBC31F10.16 - Schizosaccharomyces pombe                                      | -0.5 |
| An02g07430 | strong similarity to homoserine dehydrogenase YJR139c - Saccharomyces cerevisiae                                        | -0.5 |
| An02g07120 | strong similarity to viral integration site protein int-6/EIF-3 P48 - Mus musculus                                      | -0.5 |
| An02g06530 | strong similarity to protein required for dispersion of mitochondria cluA - Dictyostelium discoideum                    | -0.5 |
| An02g06390 | strong similarity to cytoplasmic ribosomal protein of the small subunit Rp30 - Saccharomyces cerevisiae                 | -0.5 |
| An02g05880 | strong similarity to 29.9 kD subunit of NADH:ubiquinone reductase - Neurospora crassa                                   | -0.5 |
| An02g05870 | strong similarity to coatomer beta subunit copB2 - Homo sapiens [putative frameshift]                                   | -0.5 |
| An02g04830 | strong similarity to extragenic suppressor of the bimD6 mutation sudD - Aspergillus nidulans                            | -0.5 |
| An02g03850 | similarity to small nuclear ribonucleoprotein G snRPG - Homo sapiens                                                    | -0.5 |
| An02g03620 | strong similarity to protein involved in cephalosporin C biosynthesis from patent JP09009966-A - Acremonium chrysogenum | -0.5 |
| An02g03510 | similarity to arylalkylamine N-acetyltransferase AANAT1 - Esox lucius                                                   | -0.5 |
| An02g03290 | strong similarity to hypothetical protein SPCC4G3.11 - Schizosaccharomyces pombe                                        | -0.5 |
| An02g03180 | strong similarity to DNA-directed RNA polymerase II accessory protein Cdc73 - Saccharomyces cerevisiae                  | -0.5 |
| An02g02980 | strong similarity to protein influencing Itr1 expression Die2 - Saccharomyces cerevisiae                                | -0.5 |
| An02g02910 | strong similarity to orotate reductase pyrE - Aspergillus nidulans                                                      | -0.5 |
| An02g02900 | strong similarity to RNA polymerase II-associated factor Paf1 - Saccharomyces cerevisiae                                | -0.5 |
| An02g02320 | similarity to RNA polymerase II transcription factor Upc2 - Saccharomyces cerevisiae                                    | -0.5 |
| An02g02170 | strong similarity to tryptophan synthase Trp5 - Saccharomyces cerevisiae                                                | -0.5 |
| An02g01740 | strong similarity to mitochondrial phenylalanine--tRNA ligase alpha subunit Msf1 - Saccharomyces cerevisiae             | -0.5 |
| An02g01630 | similarity to spastin protein Spast - Homo sapiens                                                                      | -0.5 |
| An02g00890 | strong similarity to phosphoserine transaminase Ser1 - Saccharomyces cerevisiae                                         | -0.5 |
| An01g14680 | similarity to hypothetical protein SPCC576.01c - Schizosaccharomyces pombe                                              | -0.5 |
| An01g14110 | strong similarity to phosphatidylserine decarboxylase 1 Psd1 - Saccharomyces cerevisiae                                 | -0.5 |
| An01g12180 | strong similarity to tRNA (cytosine-5-)-methyltransferase Ncl1 - Saccharomyces cerevisiae                               | -0.5 |
| An01g12020 | strong similarity to hypothetical protein encoded by An04g09400 - Aspergillus niger                                     | -0.5 |
| An01g11960 | similarity to brefeldin A resistance protein Bfr1 - Saccharomyces cerevisiae                                            | -0.5 |
| An01g11920 | similarity to hypothetical protein SPBC1A4.06c - Schizosaccharomyces pombe                                              | -0.5 |
| An01g11650 | strong similarity to formyltetrahydrofolate deformylase purU - Corynebacterium sp.                                      | -0.5 |
| An01g10900 | similarity to hypothetical la costa protein lcs - Drosophila melanogaster                                               | -0.5 |
| An01g10570 | similarity to hypothetical protein EAA65998.1 - Aspergillus nidulans                                                    | -0.5 |
| An01g10340 | similarity to hypothetical fatty acid elongation protein Sur4 - Saccharomyces cerevisiae                                | -0.5 |
| An01g10070 | strong similarity to signal recognition particle chain Sec65 - Saccharomyces cerevisiae                                 | -0.5 |

|            |                                                                                                                           |      |
|------------|---------------------------------------------------------------------------------------------------------------------------|------|
| An01g09910 | strong similarity to GPI-anchor biosynthesis protein Pig-a - <i>Saccharomyces cerevisiae</i>                              | -0.5 |
| An01g09550 | similarity to hypothetical dihydrolipoamide dehydrogenase Rv2713 - <i>Mycobacterium tuberculosis</i>                      | -0.5 |
| An01g09500 | strong similarity to cytosolic threonine--tRNA ligase Ths1 - <i>Saccharomyces cerevisiae</i>                              | -0.5 |
| An01g09100 | strong similarity to actin-related protein arpA - <i>Aspergillus oryzae</i>                                               | -0.5 |
| An01g08860 | strong similarity to hypothetical protein 12F11.240 - <i>Neurospora crassa</i>                                            | -0.5 |
| An01g08490 | strong similarity to histidine--tRNA ligase Hts1 - <i>Saccharomyces cerevisiae</i>                                        | -0.5 |
| An01g08280 | strong similarity to hypothetical protein CAC28582.1 - <i>Neurospora crassa</i>                                           | -0.5 |
| An01g08090 | strong similarity to aminoimidazole ribonucleotide carboxylase ADE2 - <i>Candida glabrata</i>                             | -0.5 |
| An01g07500 | strong similarity to hypothetical protein CAF06125.1 - <i>Neurospora crassa</i>                                           | -0.5 |
| An01g07460 | similarity to beta transducin-like protein het-e1 - <i>Podospora anserina</i>                                             | -0.5 |
| An01g07430 | strong similarity to mitochondrial ribosomal protein of the large subunit L2 - <i>Saccharomyces cerevisiae</i>            | -0.5 |
| An01g07200 | similarity to N-acetylglucosaminyltransferases chain p110 - <i>Rattus norvegicus</i>                                      | -0.5 |
| An01g07190 | strong similarity to component of the translocase of mitochondrial inner membrane Tim54 - <i>Saccharomyces cerevisiae</i> | -0.5 |
| An01g06250 | strong similarity to hypothetical zinc-finger protein SPCC1223.01 - <i>Schizosaccharomyces pombe</i>                      | -0.5 |
| An01g06230 | strong similarity to translation initiation factor 3 subunit eIF3 beta - <i>Homo sapiens</i>                              | -0.5 |
| An01g06210 | strong similarity to F-box protein Rcy1 - <i>Saccharomyces cerevisiae</i>                                                 | -0.5 |
| An01g05820 | strong similarity to homoprotocatechuate operon enzyme hpcE - <i>Escherichia coli</i>                                     | -0.5 |
| An01g05760 | strong similarity to ubiquitin fusion degradation protein Ufd1 - <i>Saccharomyces cerevisiae</i>                          | -0.5 |
| An01g05050 | strong similarity to pyridoxal kinase PKH - <i>Homo sapiens</i>                                                           | -0.5 |
| An01g04900 | strong similarity to hypothetical protein CAC18296.1 - <i>Neurospora crassa</i>                                           | -0.5 |
| An01g04410 | strong similarity to N-acetyl transferase NACTH from patent US6017744-A - <i>Homo sapiens</i>                             | -0.5 |
| An01g04230 | strong similarity to hypothetical WD-repeat transcription regulation protein SPCC18.13 - <i>Schizosaccharomyces pombe</i> | -0.5 |
| An01g02800 | strong similarity to signal recognition particle 68K protein SRP68 - <i>Canis lupus</i>                                   | -0.5 |
| An01g02000 | similarity to aromatic-L-amino-acid decarboxylase DDC - <i>Rattus norvegicus</i>                                          | -0.5 |
| An01g01390 | similarity to chromatin remodeling Snf/Swi complex subunit Arp9 - <i>Saccharomyces cerevisiae</i>                         | -0.5 |
| An18g03560 | weak similarity to human protein MLN 51 from patent WO9706256-A2 - <i>Homo sapiens</i>                                    | -0.5 |
| An17g02280 | strong similarity to aspartate kinase Hom3 - <i>Saccharomyces cerevisiae</i>                                              | -0.5 |
| An16g04700 | similarity to mitochondrial ribosomal protein of the small subunit Mrp51 - <i>Saccharomyces cerevisiae</i>                | -0.5 |
| An15g02670 | strong similarity to essential protein #22 from patent WO2003076464-A2 - <i>Aspergillus fumigatus</i> [truncated ORF]     | -0.5 |
| An15g00600 | weak similarity to hypothetical protein CAD11363.1 - <i>Neurospora crassa</i>                                             | -0.5 |
| An14g07060 | strong similarity to fatty acid regulation protein Frm2 - <i>Saccharomyces cerevisiae</i>                                 | -0.5 |
| An13g00090 | strong similarity to eburicol 14 alpha-demethylase cyp51 - <i>Uncinula necator</i>                                        | -0.5 |
| An12g04940 | strong similarity to mitochondrial heat shock protein Hsp60 - <i>Saccharomyces cerevisiae</i>                             | -0.5 |
| An08g06400 | strong similarity to actin-related protein arp2p - <i>Schizosaccharomyces pombe</i> [truncated ORF]                       | -0.5 |
| An08g04590 | similarity to hypothetical scaffold protein CG6385 - <i>Drosophila melanogaster</i>                                       | -0.5 |
| An08g01190 | strong similarity to subunit of the major N alpha-acetyltransferase Ard1 - <i>Saccharomyces cerevisiae</i>                | -0.5 |
| An04g07340 | strong similarity to hypothetical cytoskeleton specific chaperonin subunit Cct8 - <i>Saccharomyces cerevisiae</i>         | -0.5 |
| An02g03770 | strong similarity to precursor of heat shock protein Mdj1 - <i>Saccharomyces cerevisiae</i>                               | -0.5 |
