# Supplementary material for: A Transcriptome Meta-Analysis Proposes Novel Biological Roles for the Antifungal Protein AnAFP in Aspergillus niger
Source: PubMed Central journal article supplement (PMC5106034; doi:10.1371/journal.pone.0165755), 2016-11-11
Supplement: pone.0165755.s009.pdf [file pone.0165755.s009.pdf]

S4 Table

| Motif     | Consensus        | TF          | Publication                                    |
|-----------|------------------|-------------|------------------------------------------------|
| AbaA      | CATTCT           | AbaA        | Andrianopoulos and Timberlake, 1994            |
| AmyR      | CGGNNNNNNNMGG    | AmyR        | Petersen KL, et al. 1999                       |
| AreA      | HGATAR           | AreA        | Peters and Caddick, 1994                       |
| AtfB      | AGCCS            | AtfB        | Roze LV, et al. 2011                           |
| BRE       | MRAGGGR          | BrlA        | Chang and Timberlake, 1998                     |
| Cbf1-A    | TCACGTG          | Cbf1        | Caruso ML, et al. 2002                         |
| Cbf1-B    | RTCACRTGA        | Cbf1        | Caruso ML, et al. 2002                         |
| CDRE-A    | GAGGCTG          | CrzA        | Yoshimoto, et al. 2002                         |
| CDRE-B    | GTGGCTG          | CrzA        | Stathopoulos and Cyert, 1997                   |
| CDRE-C    | GAGGCTC          | CrzA        | Spielvogel, et al. 2008                        |
| CpcA-A    | TTGACTCT         | CpcA        | Hoffmann, et al. 2001                          |
| CpcA-B    | ATGACTCA         | CpcA        | Hoffmann, et al. 2001                          |
| CreA      | SYGGRG           | CreA        | Kulmburg P, et al. 1994                        |
| FarA/FarB | CCTCGG           | FarA/FarB   | Vogsangnak W, et al. 2010                      |
| Fkh1-A    | GTAACAA          | AcFKH1      | Schmitt EK, et al. 2004                        |
| Fkh1-B    | GGTAAACAA        | AcFKH1      | Schmitt EK, et al. 2004                        |
| Fkh2-A    | GTAACAA          | AcFKH1      | Schmitt EK, et al. 2004                        |
| Fkh2-B    | GGTAAACAA        | AcFKH1      | Schmitt EK, et al. 2004                        |
| Flo8p     | TTTGCNGCAAA      | SomA        | Lin CJ, et al. 2015                            |
| GARE      | CCTCGG           | GARE        | Niu J, et al. 2015                             |
| Gcn4p-A   | TGASTCA          | CpcA        | Wanke C, et al. 1997                           |
| Gcn4p-B   | ARTGACTCW        | CpcA        | Wanke C, et al. 1997                           |
| HacA-A    | CANRNTGKCCT      | HacA        | Mulder, et al. 2006                            |
| HacA-B    | CANNTGKCCT       | HacA        | Mulder, et al. 2006                            |
| HAP       | CCAAT            | HAP         | Kato, et al. 1998                              |
| LeuB      | CCGNNNNCGG       | LeuB        | Downes DJ, et al. 2013                         |
| MARE-A    | TGCTGAC          | L-Maf       | Yoshida, et al. 2005                           |
| MARE-B    | TGCTGACNTCAGCA   | L-Maf       | Yoshida, et al. 2005                           |
| MeaB      | TTGACCCAT        | MeaB        | Wong KH, et al. 2007                           |
| PacC      | GCCARG           | PacC        | Espeso and Penalva, 1996                       |
| PecR      | CCCTGA           | PecR        | Niu J, et al. 2015                             |
| RhaR      | CGGXXXXXXXXXXCCG | RhaR        | Pardo E, et al. 2014                           |
| Rlm1p-A   | CTAWWWWTAG       | Rlm1p       | Jung and Levin 1999                            |
| Rlm1p-B   | TAWWWWTAG        | Rlm1p       | Jung and Levin 1999                            |
| Rlm1p-C   | CTAWWWWTAR       | Rlm1p       | Jung and Levin 2002                            |
| RsmA      | TGACACA          | RsmA        | Yin WB, et al. 2012                            |
| SltA      | CAGGCAT          | SltA        | Spielvogel, et al. 2008                        |
| STRE-A    | AAGGGG           | Msn2p/Msn4p | Peterbauer CK, et al. 2002                     |
| StuA      | NWWCGCGWNM       | StuA        | Dutton, et al. 1997                            |
| Swi5      | KGCTGR           | AcFKH1      | Schmitt EK, et al. 2004                        |
| TamA      | CCCGAASTTCGG     | TamA        | Downes DJ, et al. 2014                         |
| Tec1p-A   | CATTCC           | AbaA        | Gavrias V, et al. 1996                         |
| Tec1p-B   | CATTCT           | AbaA        | Gavrias V, et al. 1996                         |
| Tec1p-C   | CATTCT           | AbaA        | Gavrias V, et al. 1996                         |
| TerR      | TCGGHHWYHCGGH    | TerR        | Gressler M, et al. 2015                        |
| XlnR      | GGNTAAA          | XlnR        | Andersen MR, et al. 2008                       |
| Yap1p-A   | TTASTMA          | Afyap1      | Qiao J, et al. 2008 and Lessing F, et al. 2007 |
| Yap1p-B   | TTACTAA          | Afyap1      | Qiao J, et al. 2008 and Lessing F, et al. 2007 |

|         |               |        |                                                   |
|---------|---------------|--------|---------------------------------------------------|
| Yap1p-C | TTAGTMAGC     | Afyap1 | Qiao J, et al. 2008 and<br>Lessing F, et al. 2007 |
| Yap1p-D | MTKASTMA      | Afyap1 | Qiao J, et al. 2008 and<br>Lessing F, et al. 2007 |
| Zap1p-A | ACCYNAAGGT    | ZafA   | Moreno MA, et al. 2007                            |
| Zap1p-B | ACCCTMAAGGYRT | ZafA   | Moreno MA, et al. 2007                            |
| Zap1p-C | ACCCTAAAGGT   | ZafA   | Moreno MA, et al. 2007                            |

---
